# Supplementary material for: Comparative genomics of Agaricales reveals substrate-driven adaptive radiation and genomic innovations in the subterranean mushroom Agaricus sinodeliciosus
Source: Research Square preprint supplement (doi:10.21203/rs.3.rs-8432113/v1), 2026-02-03
Supplement: Supplementary file 1 [file Table S1 - Genome features of A.sinodeliciosus.xlsx]

## Sheet: Sheet1
Table S1 General features of the A. sinodeliciosus genome
Feature	A. bisporus ARP23	A. bisporus	A. bisporus	A. sinodeliciosus	ZRL- A. sinodeliciosus
		H97	JB137-S8
Number of Scaffolds	169	29	2016	106	58
Total Size of Scaffolds (Mb)	33.49	30.23	31.2	36.37	32.37
N50	350711	2334609	1225131	2869033	1, 460,65
GC content (%)	46.33	46.48	46.59	45.6	45.91
Number of Introns	70261	50356	53337	52966
Complete BUSCOs (C)	0.876	0.878	0.883	0.9128	93.1 %
protein coding genes	13030	10863	11289	9466	9086
Number of tRNA	200	160	215	297	123
Number of rRNA	10	22	3	358	14
Number of sRNA	93	90	87	11	0
Repetitive regions (%)	0.79	11.2	11.2	29.12	23.36
Anti-SMASH secondary metabolite regions				18	17
