# Supplementary material for: Comparative genomics of Agaricales reveals substrate-driven adaptive radiation and genomic innovations in the subterranean mushroom Agaricus sinodeliciosus
Source: Research Square preprint supplement (doi:10.21203/rs.3.rs-8432113/v1), 2026-02-03
Supplement: Supplementary file 2 [file Table S10 - CAZyme expression substrate degradation at developmental stage.xlsx]

## Sheet: Sheet1
Table S10 Analysis of gene expression levels of carbohydrate enzyme families involved in substrate degradation at different developmental stages
CAZymes	Activity related to PCW degradation	Substrate(s)		Gene id		M (TPM)	P (TPM)		CFB (TPM)
AA2	Class II peroxidases (POD)		Lignin	EVM0001938		48.58	19.23
AA2	Class II peroxidases (POD)		Lignin	EVM0002724		0.106667	6.60333
AA2	Class II peroxidases (POD)		Lignin	EVM0004422		245.163	14.0867
AA2	Class II peroxidases (POD)		Lignin	EVM0006668		619.077	110.677
AA2	Class II peroxidases (POD)		Lignin	EVM0001927		25.8233	11.04
AA2	Class II peroxidases (POD)		Lignin	EVM0004700		11.2033	0.39
AA2	Class II peroxidases (POD)		Lignin	EVM0005333		4.60667	17.01
AA2	Class II peroxidases (POD)		Lignin	EVM0007311		5.85333	110.607
AA2	Class II peroxidases (POD)		Lignin	EVM0006002		1.33667	10.3567
AA2	Class II peroxidases (POD)		Lignin	EVM0005718		3.99	15.96
AA2	Class II peroxidases (POD)		Lignin	EVM0002697		33.79	8.00333
AA1	Laccase-like multicopper oxidase		Lignin	EVM0002302		3.80667	11.0433
AA1	Laccase-like multicopper oxidase		Lignin	EVM0007055		8.55667	60.6433
AA1	Laccase-like multicopper oxidase		Lignin	EVM0006850		2.24	13.97
AA1	Laccase-like multicopper oxidase		Lignin	EVM0002429		s·	35.9567
AA1	Laccase-like multicopper oxidase		Lignin	EVM0007638		4.07333	12.3167
AA3	Cellobiose dehydrogenases (CDH)		Cellulose	EVM0002291		3.226	7.106
AA9	Copper-dependent lytic polysaccharide monooxygenase (LPMOs)		Cellulose	EVM0002342		243.78	77
AA9	Copper-dependent lytic polysaccharide monooxygenases (LPMOs)		Cellulose	EVM0006953		10.78	48.72
CE12	Pectin acetylesterase; rhamnogalacturonan acetylesterase; acetyl xylan esterase		Hemicellulose / pectin	EVM0004655		14.7133	37.58
GH 12	Xyloglucan-specific endo-beta-1,4-glucanase		Cellulose, Hemicellulose	EVM0005951		0.31	8.63333
GH 12	Xyloglucan-specific endo-beta-1,4-glucanase		Cellulose, Hemicellulose	EVM0000448		10.0133	4.96667
GH 16	Glycosidase		Hemicellulose	EVM0005778		82.9733	0.806667		13.98
GH 16	Endo-1,3-β-glucanase		Hemicellulose	EVM000697		24.41	92.27
GH 16	Endo-beta-1,3-galactanase		Hemicellulose	EVM0006051		1.77	6.80333
GH 16	Glycosidase		Hemicellulose	EVM0003390		379.647	61.9467
GH 16	Glycosidase		Hemicellulose	EVM0000819		10.18	192.523
GH 16	Endo-beta-1,3-galactanase		Hemicellulose	EVM0004421		21.83	238.087
GH 1	β-mannosidase/β-glucosidase		Cellulose, Hemicellulose (xyloglucans), Pectin	EVM0001415		10.03	79.22
GH 28	Exo-polygalacturonase; exo-polygalacturonosidase; rhamnogalacturonase; rhamnogalacturonan α-1,2-galacturonohydrolase ; endo-xylogalacturonan hydrolase		Pectin (HG)	EVM0007972		12.3467	27.1633
GH 28	exo-polygalacturonase; exo-polygalacturonosidase; rhamnogalacturonase; rhamnogalacturonan α-1,2-galacturonohydrolase; endo-xylogalacturonan hydrolase		Pectin (HG)	EVM0009028		1.09	58.58
GH 2	α-L-arabinofuranosidase; mannosylglycoprotein endo-β-mannosidase; exo-β-glucosaminidase; α-L-arabinopyranosidase; β-galacturonidase		Hemicellulose	EVM0004106		13.2933	63.5967
GH 30, 59	Endo-β-1,4-xylanase; β-glucosidase; β-glucuronidase; β-xylosidase; β-fucosidase		Cellulose, Hemicellulose, Pectin, AGP	EVM0003695		15.7467	52.6233
GH 35	β-galactosidase		Hemicellulose, Pectin, AGPs	EVM0006897		24.5467	77.7633
GH 3	β-glucosidase/β-xylosidase		Cellulose, Pectin (RGI), Hemicellulose	EVM0002759		106.21	371.14
GH 3	Exo-1,4-β-xylosidase		Cellulose, Pectin (RGI), Hemicellulose	EVM0003997		7.58667	16.85
GH 3	β-glucosidase		Cellulose, Pectin (RGI), Hemicellulose	EVM0000697		13.2967	121.487
GH 43	Endo-1,5-α-L-arabinosidase		Hemicellulose, Pectin,	EVM0001090		5.74	31.1833
GH 47	1,2-β-mannosidase		Hemicellulose	EVM0002047		52.7333	18.43
GH 47	1,2-α-mannosidase		Hemicellulose	EVM0005015		12.4867	40.51
GH 47	1,2-α-mannosidase		Hemicellulose	EVM0004322		10.1867	48.3833
GH 53	Endo-β-1,4-galactanase		Pectin (RGI)	EVM0007531		16.7333	41.4433
GH 5	Ergosteryl-β-glucosidase		Cellulose, Hemicellulsoe	EVM0005634		105.85	46.6333
GH 88	D-4,5-unsaturated β-glucuronyl hydrolase		Polysaccharides	EVM0005011		31.73	464.253
GH 88	Unsaturated rhamnogalacturonyl hydrolase		Polysaccharides	EVM0004315		8.39667	49.1867
GH 18	Chitinase		Chitinase	EVM0005409		33.1367	323.237
GH 18	Chitinase		Chitinase	EVM0003094		130.523	20.97
GH 18	Chitinase		Chitinase	EVM0005669		9.11	564.647
GH 18	Chitinase		Chitinase	EVM0001587		20.0733	109.637
GH 18	Chitinase		Chitinase	EVM0006360		4.47667	9.95
GH 18	Chitinase		Chitinase	EVM0005311		10.9167	192.113
GH 18	Chitinase		Chitinase	EVM0005482		52.5733	27.46
GH 18	Chitinase		Chitinase	EVM0004136		5.57667	22.0967
GH 18	Chitinase		Chitinase	EVM0003904		17.47	136.687
PL 1	Pectate lyase; exo-pectate lyase; pectin lyase		Pectin	EVM0009379		69.8267	315.587
PL 2	Pectate lyase; exo-polygalacturonate lyase		Pectin	EVM0005509		1.62667	4.82667
PL 3	Pectate lyase		Pectin	EVM0000015		21.5067	274.49
PL 4	Rhamnogalacturonan endolyase		Pectin	EVM0003367		8.28667	23.39
PL 5	Endo-β-1,4-glucuronan lyase		Pectin	EVM0007903		8.27667	30.3467
