# Supplementary material for: Comparative genomics of Agaricales reveals substrate-driven adaptive radiation and genomic innovations in the subterranean mushroom Agaricus sinodeliciosus
Source: Research Square preprint supplement (doi:10.21203/rs.3.rs-8432113/v1), 2026-02-03
Supplement: Supplementary file 3 [file Table S11 - 122 GenomeList v3.1 SM 17Oct25.xlsx]

## Sheet: Table S11 - 122_Agaricales list
Table S11 - Genome list
JGI.fungal.ID	TreeOrd	Ecology	Phylum	Class	Order	Family	Genus	SpeciesID	GenomeID	JGI.link	Ecology.details	Pubished	Bioproject	Biosample
Phocon1	1	Wood saprotroph	Basidiomycota	Agaricomycetes	Agaricales	Strophariaceae	Pholiota	Pholiota conissans	Pholiota conissans CIRM-BRFM 674 v1.0	https://mycocosm.jgi.doe.gov/Phocon1/Phocon1.home.html	wood or litter_saprotroph	Ruiz-Dueas FJ et al., 2021
Phosp1	2	Wood saprotroph	Basidiomycota	Agaricomycetes	Agaricales	Strophariaceae	Pholiota	Pholiota sp.	Pholiota sp. NL-8118 v1.0	https://mycocosm.jgi.doe.gov/Phosp1/Phosp1.home.html	wood_saprotroph (white-rot)		PRJNA1080876	SAMN40217793
Phohig1	3	Soil saprotroph	Basidiomycota	Agaricomycetes	Agaricales	Strophariaceae	Pholiota	Pholiota molesta	Pholiota molesta CBS 144467 v1.0	https://mycocosm.jgi.doe.gov/Phohig1/Phohig1.home.html	soil_saprotroph	Steindorff AS et al., 2021
Hypsu1	4	Wood saprotroph	Basidiomycota	Agaricomycetes	Agaricales	Strophariaceae	Hypholoma	Hypholoma sublateritium	Hypholoma sublateritium v1.0	https://mycocosm.jgi.doe.gov/Hypsu1/Hypsu1.home.html	wood_saprotroph	Kohler A et al., 2015
Phoaln1	5	Soil saprotroph	Basidiomycota	Agaricomycetes	Agaricales	Strophariaceae	Flammula	Pholiota alnicola	Pholiota alnicola AH 47727 v1.0	https://mycocosm.jgi.doe.gov/Phoaln1/Phoaln1.home.html	soil_saprotroph	Ruiz-Dueas FJ et al., 2021
Hebvel2	6	Ectomycorrhiza	Basidiomycota	Agaricomycetes	Agaricales	Hymenogastraceae	Hebeloma	Hebeloma brunneifolium	Hebeloma brunneifolium PMI1Jessy v2.0	https://mycocosm.jgi.doe.gov/Hebvel2/Hebvel2.home.html	ectomycorrhizal		PRJNA677736	SAMN16773327
Hebcy2	7	Ectomycorrhiza	Basidiomycota	Agaricomycetes	Agaricales	Hymenogastraceae	Hebeloma	Hebeloma cylindrosporum	Hebeloma cylindrosporum h7 v2.0	https://mycocosm.jgi.doe.gov/Hebcy2/Hebcy2.home.html	ectomycorrhizal	Kohler A et al., 2015
Psicub1_1	8	Grass saprotroph	Basidiomycota	Agaricomycetes	Agaricales	Strophariaceae	Psilocybe	Psilocybe cubensis	Psilocybe cubensis v1.0	https://mycocosm.jgi.doe.gov/Psicub1_1/Psicub1_1.home.html	grass-saprotroph	Fricke J et al., 2017
Psiser1	9	Litter saprotroph	Basidiomycota	Agaricomycetes	Agaricales	Strophariaceae	Psilocybe	Psilocybe serbica	Psilocybe serbica v1.0	https://mycocosm.jgi.doe.gov/Psiser1/Psiser1.home.html	litter_saprotroph (forest litter)	Fricke J et al., 2017
Agrped1	10	Grass saprotroph	Basidiomycota	Agaricomycetes	Agaricales	Strophariaceae	Agrocybe	Agrocybe pediades	Agrocybe pediades AH 40210 v1.0	https://mycocosm.jgi.doe.gov/Agrped1/Agrped1.home.html	grass-saprotroph	Ruiz-Dueas FJ et al., 2021
Agrpra2	11	Litter saprotroph	Basidiomycota	Agaricomycetes	Agaricales	Strophariaceae	Agrocybe	Agrocybe praecox	Agrocybe praecox OKM6292 v1.0	https://mycocosm.jgi.doe.gov/Agrpra2/Agrpra2.home.html	litter_saprotroph		PRJNA368367	SAMN06266818
Gymch1	12	Wood saprotroph	Basidiomycota	Agaricomycetes	Agaricales	Hymenogastraceae	Gymnopilus	Gymnopilus chrysopellus	Gymnopilus chrysopellus PR-1187 v1.0	https://mycocosm.jgi.doe.gov/Gymch1/Gymch1.home.html	wood_saprotroph		PRJNA196058	SAMN02745969
Gymjun1	13	Wood saprotroph	Basidiomycota	Agaricomycetes	Agaricales	Hymenogastraceae	Gymnopilus	Gymnopilus junonius	Gymnopilus junonius AH 44721 v1.0	https://mycocosm.jgi.doe.gov/Gymjun1/Gymjun1.home.html	wood_saprotroph (white_rot)	Ruiz-Dueas FJ et al., 2021
Galma1	14	Wood saprotroph	Basidiomycota	Agaricomycetes	Agaricales	Strophariaceae	Galerina	Galerina marginata	Galerina marginata v1.0	https://mycocosm.jgi.doe.gov/Galma1/Galma1.home.html	wood_saprotroph (white_rot)	Riley R et al., 2014
Crafun1	15	Soil saprotroph	Basidiomycota	Agaricomycetes	Agaricales	Crassisporiaceae	Crassisporium	Crassisporium funariophilum	Crassisporium funariophilum CBS 144457 v1.0	https://mycocosm.jgi.doe.gov/Crafun1/Crafun1.home.html	soil_saprotroph	Steindorff AS et al., 2021
Corgl3	16	Ectomycorrhiza	Basidiomycota	Agaricomycetes	Agaricales	Cortinariaceae	Phlegmacium	Phlegmacium glaucopus	Phlegmacium glaucopus AT 2004 276 v2.0	https://mycocosm.jgi.doe.gov/Corgl3/Corgl3.home.html	ectomycorrhizal	Miyauchi S et al., 2020
Crevar1	17	Wood saprotroph	Basidiomycota	Agaricomycetes	Agaricales	Crepidotaceae	Crepidotus	Crepidotus variabilis	Crepidotus variabilis CBS 506.95 v1.0	https://mycocosm.jgi.doe.gov/Crevar1/Crevar1.home.html	wood_saprotroph	Ruiz-Dueas FJ et al., 2021
Creces1	18	Wood saprotroph	Basidiomycota	Agaricomycetes	Agaricales	Crepidotaceae	Crepidotus	Crepidotus cesatii	Crepidotus cesatii CBS 511.95 v1.0	https://mycocosm.jgi.doe.gov/Creces1/Creces1.home.html	wood_saprotroph		PRJNA363660	SAMN06265513
Inolan1	19	Wood saprotroph	Basidiomycota	Agaricomycetes	Agaricales	Inocybaceae	Inosperma	Inosperma lanatodiscum	Inosperma lanatodiscum 2018PMI007 v1.0	https://mycocosm.jgi.doe.gov/Inolan1/Inolan1.home.html	wood_saprotroph		PRJNA1080749	SAMN40207299
Phapla1	20	Wood saprotroph	Basidiomycota	Agaricomycetes	Agaricales	Chromocyphellaceae	Phaeosolenia	Phaeosolenia platensis	Phaeosolenia platensis CBS 268.64 v1.0	https://mycocosm.jgi.doe.gov/Phapla1/Phapla1.home.html	wood_saprotroph		PRJNA368366	SAMN06266788
Panpap1	21	Grass saprotroph	Basidiomycota	Agaricomycetes	Agaricales	Galeropsidaceae	Panaeolus	Panaeolus papilionaceus	Panaeolus papilionaceus CIRM-BRFM 715 v1.0	https://mycocosm.jgi.doe.gov/Panpap1/Panpap1.home.html	grass-saprotroph	Ruiz-Dueas FJ et al., 2021
Conapa1	22	Grass saprotroph	Basidiomycota	Agaricomycetes	Agaricales	Bolbitiaceae	Conocybe	Conocybe apala	Conocybe apala SZMC-NL-8967 v1.0	https://mycocosm.jgi.doe.gov/Conapa1/Conapa1.home.html	grass-saprotroph		PRJNA519864	SAMN10865785
Bolvit1	23	Grass saprotroph	Basidiomycota	Agaricomycetes	Agaricales	Bolbitiaceae	Bolbitius	Bolbitius vitellinus	Bolbitius vitellinus SZMC-NL-1974 v1.0	https://mycocosm.jgi.doe.gov/Bolvit1/Bolvit1.home.html	grass-saprotroph		PRJNA334996	SAMN05444727
Copci1	24	Litter saprotroph	Basidiomycota	Agaricomycetes	Agaricales	Psathyrellaceae	Coprinopsis	Coprinopsis cinerea	Coprinopsis cinerea	https://mycocosm.jgi.doe.gov/Copci1/Copci1.home.html	litter_saprotroph (forest litter)	Stajich JE et al., 2010
Copscl1	25	Grass saprotroph	Basidiomycota	Agaricomycetes	Agaricales	Psathyrellaceae	Coprinopsis	Coprinopsis sclerotiger	Coprinopsis sclerotiger v1.0	https://mycocosm.jgi.doe.gov/Copscl1/Copscl1.home.html	grass-saprotroph
Copmar1	26	Grass saprotroph	Basidiomycota	Agaricomycetes	Agaricales	Psathyrellaceae	Coprinopsis	Coprinopsis marcescibilis	Coprinopsis marcescibilis CBS121175 v1.0	https://mycocosm.jgi.doe.gov/Copmar1/Copmar1.home.html	grass-saprotroph	Varga T et al., 2019
Coppel1	27	Grass saprotroph	Basidiomycota	Agaricomycetes	Agaricales	Psathyrellaceae	Coprinellus	Coprinellus pellucidus	Coprinellus pellucidus v1.0	https://mycocosm.jgi.doe.gov/Coppel1/Coppel1.home.html	grass-saprotroph
Copang1	28	Litter saprotroph	Basidiomycota	Agaricomycetes	Agaricales	Psathyrellaceae	Tulosesus	Coprinellus angulatus	Coprinellus angulatus CBS 144469 v1.0	https://mycocosm.jgi.doe.gov/Copang1/Copang1.home.html	litter_saprotroph (wood litter)	Steindorff AS et al., 2021
Copmic2	29	Litter saprotroph	Basidiomycota	Agaricomycetes	Agaricales	Psathyrellaceae	Coprinellus	Coprinellus micaceus	Coprinellus micaceus FP101781 v2.0	https://mycocosm.jgi.doe.gov/Copmic2/Copmic2.home.html	litter_saprotroph	Varga T et al., 2019
Lacbi2	30	Ectomycorrhiza	Basidiomycota	Agaricomycetes	Agaricales	Hydnangiaceae	Laccaria	Laccaria bicolor	Laccaria bicolor v2.0	https://mycocosm.jgi.doe.gov/Lacbi2/Lacbi2.home.html	ectomycorrhizal	Martin F et al., 2008
Lacam2	31	Ectomycorrhiza	Basidiomycota	Agaricomycetes	Agaricales	Hydnangiaceae	Laccaria	Laccaria amethystina	Laccaria amethystina LaAM-08-1 v2.0	https://mycocosm.jgi.doe.gov/Lacam2/Lacam2.home.html	ectomycorrhizal	Kohler A et al., 2015
Cyapal1	32	Wood saprotroph	Basidiomycota	Agaricomycetes	Agaricales	Nidulariaceae	Cyathus	Cyathus pallidus	Cyathus pallidus NK-01 v1.0	https://mycocosm.jgi.doe.gov/Cyapal1/Cyapal1.home.html	wood_saprotroph	Kraisitudomsook et al. 2024
Cyaste1	33	Grass saprotroph	Basidiomycota	Agaricomycetes	Agaricales	Nidulariaceae	Cyathus	Cyathus stercoreus	Cyathus stercoreus NK-82 v1.0	https://mycocosm.jgi.doe.gov/Cyaste1/Cyaste1.home.html	grass-saprotroph	Kraisitudomsook et al. 2024
Cyastr2	34	Wood saprotroph	Basidiomycota	Agaricomycetes	Agaricales	Nidulariaceae	Cyathus	Cyathus striatus	Cyathus striatus AH 40144 v1.0	https://mycocosm.jgi.doe.gov/Cyastr2/Cyastr2.home.html	wood_saprotroph	Ruiz-Due√±as FJ et al., 2021
Mycden1	35	Wood saprotroph	Basidiomycota	Agaricomycetes	Agaricales	Nidulariaceae	Mycocalia	Mycocalia denudata	Mycocalia denudata CBS 494.85 v1.0	https://mycocosm.jgi.doe.gov/Mycden1/Mycden1.home.html	wood_saprotroph (white_rot)	Kraisitudomsook et al. 2024
Nidsp1	36	Wood saprotroph	Basidiomycota	Agaricomycetes	Agaricales	Nidulariaceae	Nidula	Nidula sp.	Nidula sp. CBS 380.80 v1.0	https://mycocosm.jgi.doe.gov/Nidsp1/Nidsp1.home.html	wood_saprotroph (white-rot)		PRJNA1080768	SAMN40290207
Crula1	37	Wood saprotroph	Basidiomycota	Agaricomycetes	Agaricales	Nidulariaceae	Crucibulum	Crucibulum laeve	Crucibulum laeve CBS 166.37 v1.0	https://mycocosm.jgi.doe.gov/Crula1/Crula1.home.html	wood_saprotroph(white rot)	Varga T et al., 2019
Agabi_varbisH97_2	38	Grass saprotroph	Basidiomycota	Agaricomycetes	Agaricales	Agaricaceae	Agaricus	Agaricus bisporus	Agaricus bisporus var bisporus (H97) v2.0	https://mycocosm.jgi.doe.gov/Agabi_varbisH97_2/Agabi_varbisH97_2.home.html	grass-saprotroph	Morin E et al., 2012
Agabi_varbur_1	39	Grass saprotroph	Basidiomycota	Agaricomycetes	Agaricales	Agaricaceae	Agaricus	Agaricus bisporus	Agaricus bisporus var. burnettii JB137-S8	https://mycocosm.jgi.doe.gov/Agabi_varbur_1/Agabi_varbur_1.home.html	grass-saprotroph	Morin E et al., 2012
Agasi1	40	Grass saprotroph	Basidiomycota	Agaricomycetes	Agaricales	Agaricaceae	Agaricus	Agaricus sinodeliciosus	Agaricus sinodeliciosus	https://mycocosm.jgi.doe.gov/Agasi1/Agasi1.home.html	grass-saprotroph
Macfu1	41	Litter saprotroph	Basidiomycota	Agaricomycetes	Agaricales	Agaricaceae	Macrolepiota	Macrolepiota fuliginosa	Macrolepiota fuliginosa MF-IS2 v1.0	https://mycocosm.jgi.doe.gov/Macfu1/Macfu1.home.html	litter_saprotroph	Ruiz-Dueas FJ et al., 2021
Lycper1	42	Litter saprotroph	Basidiomycota	Agaricomycetes	Agaricales	Lycoperdaceae	Lycoperdon	Lycoperdon perlatum	Lycoperdon perlatum FP-102459-T v1.0	https://mycocosm.jgi.doe.gov/Lycper1/Lycper1.home.html	litter_saprotroph		PRJNA333965	SAMN05446826
Amaapr1	43	Ectomycorrhiza	Basidiomycota	Agaricomycetes	Agaricales	Amanitaceae	Amanita	Amanita muscaria	Amanita muscaria var. formosa 2016PMI152 v1.0	https://mycocosm.jgi.doe.gov/Amaapr1/Amaapr1.home.html	ectomycorrhizal		PRJNA697207	SAMN17674610
Amamu1	44	Ectomycorrhiza	Basidiomycota	Agaricomycetes	Agaricales	Amanitaceae	Amanita	Amanita muscaria	Amanita muscaria Koide v1.0	https://mycocosm.jgi.doe.gov/Amamu1/Amamu1.home.html	ectomycorrhizal	Kohler A et al., 2015
Amarub1	45	Ectomycorrhiza	Basidiomycota	Agaricomycetes	Agaricales	Amanitaceae	Amanita	Amanita rubescens	Amanita rubescens P≈ôilba v1.0	https://mycocosm.jgi.doe.gov/Amarub1/Amarub1.home.html	ectomycorrhizal	Miyauchi S et al., 2020
Amath1	46	Ectomycorrhiza	Basidiomycota	Agaricomycetes	Agaricales	Amanitaceae	Amanita	Amanita thiersii	Amanita thiersii Skay4041 v1.0	https://mycocosm.jgi.doe.gov/Amath1/Amath1.home.html	ectomycorrhizal	Hess J et al., 2014
Trima3	47	Soil saprotroph	Basidiomycota	Agaricomycetes	Agaricales	Tricholomataceae	Tricholoma	Tricholoma matsutake	Tricholoma matsutake 945 v3.0	https://mycocosm.jgi.doe.gov/Trima3/Trima3.home.html	ectomycorrhizal	Miyauchi S et al., 2020
Tripop1	48	Soil saprotroph	Basidiomycota	Agaricomycetes	Agaricales	Tricholomataceae	Tricholoma	Tricholoma populinum	Tricholoma populinum 2016PMI031 v1.0	https://mycocosm.jgi.doe.gov/Tripop1/Tripop1.home.html	ectomycorrhizal		PRJNA677737	SAMN16773710
Lepnud1	49	Litter saprotroph	Basidiomycota	Agaricomycetes	Agaricales	Clitocybaceae	Collybia	Lepista nuda	Lepista nuda CBS 247.69 v1.0	https://mycocosm.jgi.doe.gov/Lepnud1/Lepnud1.home.html	litter_saprotroph (leaf litter)	Ruiz-Dueas FJ et al., 2021
Lyoat1	50	Soil saprotroph	Basidiomycota	Agaricomycetes	Agaricales	Lyophyllaceae	Lyophyllum	Lyophyllum atratum	Lyophyllum atratum CBS 144462 v1.0	https://mycocosm.jgi.doe.gov/Lyoat1/Lyoat1.home.html	soil_saprotroph	Steindorff AS et al., 2021
TerJ132_1	51	Insect symbiont	Basidiomycota	Agaricomycetes	Agaricales	Lyophyllaceae	Termitomyces	Termitomyces sp.	Termitomyces sp. J132	https://mycocosm.jgi.doe.gov/TerJ132_1/TerJ132_1.home.html	insect symbiont	Poulsen M et al., 2014
Hypma1	52	Wood saprotroph	Basidiomycota	Agaricomycetes	Agaricales	Lyophyllaceae	Hypsizygus	Hypsizygus marmoreus	Hypsizygus marmoreus 51987-8	https://mycocosm.jgi.doe.gov/Hypma1/Hypma1.home.html	wood_saprotroph	Min B et al., 2018
Cligib1	53	Litter saprotroph	Basidiomycota	Agaricomycetes	Agaricales		Infundibulicybe	Clitocybe gibba	Clitocybe gibba IJFM A808 v1.0	https://mycocosm.jgi.doe.gov/Cligib1/Cligib1.home.html	litter_saprotroph (leaf litter)	Ruiz-Dueas FJ et al., 2021
Plucer1	54	Wood saprotroph	Basidiomycota	Agaricomycetes	Agaricales	Pluteaceae	Pluteus	Pluteus cervinus	Pluteus cervinus NL-1719 v1.0	https://mycocosm.jgi.doe.gov/Plucer1/Plucer1.home.html	wood_saprotroph (white_rot)	Varga T et al., 2019
Volvo1	55	Grass saprotroph	Basidiomycota	Agaricomycetes	Agaricales	Pluteaceae	Volvariella	Volvariella volvacea	Volvariella volvacea V23	https://mycocosm.jgi.doe.gov/Volvo1/Volvo1.home.html	grass-saprotroph	Bao D et al., 2013
Radcon1	56	Wood saprotroph	Basidiomycota	Agaricomycetes	Agaricales	Radulomycetaceae	Radulomyces	Radulomyces confluens	Radulomyces confluens OMC1631 v1.0	https://mycocosm.jgi.doe.gov/Radcon1/Radcon1.home.html	wood_saprotroph (white-rot)		PRJNA571522	SAMN12813836
Aphpse1	57	Wood saprotroph	Basidiomycota	Agaricomycetes	Agaricales	Radulomycetaceae	Aphanobasidium	Aphanobasidium pseudotsugae	Aphanobasidium pseudotsugae OMC1630 v1.0	https://mycocosm.jgi.doe.gov/Aphpse1/Aphpse1.home.html	wood_saprotroph(white rot)		PRJNA519429	SAMN10865529
Ptegra1	58	Grass saprotroph	Basidiomycota	Agaricomycetes	Agaricales	Pterulaceae	Pterula	Pterula gracilis	Pterula gracilis CBS309.79 v1.0	https://mycocosm.jgi.doe.gov/Ptegra1/Ptegra1.home.html	grass-saprotroph	Varga T et al., 2019
Hygcoc2	59	Grass saprotroph	Basidiomycota	Agaricomycetes	Agaricales	Hygrophoraceae	Hygrocybe	Hygrocybe coccinea	Hygrocybe coccinea JK88 v2.0	https://mycocosm.jgi.doe.gov/Hygcoc2/Hygcoc2.home.html	grass-saprotroph		PRJNA1080751	SAMN40207285
Crison1	60	Pathogen	Basidiomycota	Agaricomycetes	Agaricales	Stephanosporaceae	Cristinia	Cristinia sonorae	Cristinia sonorae KKN 215 v1.0	https://mycocosm.jgi.doe.gov/Crison1/Crison1.home.html	plant pathogen		PRJNA363661	SAMN06281765
PleosPC9_1	61	Wood saprotroph	Basidiomycota	Agaricomycetes	Agaricales	Pleurotaceae	Pleurotus	Pleurotus ostreatus	Pleurotus ostreatus PC9 v1.0	https://mycocosm.jgi.doe.gov/PleosPC9_1/PleosPC9_1.home.html	wood_saprotroph	Alfaro M et al., 2016
Pleery1	62	Wood saprotroph	Basidiomycota	Agaricomycetes	Agaricales	Pleurotaceae	Pleurotus	Pleurotus eryngii	Pleurotus eryngii ATCC 90797 v1.0	https://mycocosm.jgi.doe.gov/Pleery1/Pleery1.home.html	wood_saprotroph (white_rot)	Ruiz-Dueas FJ et al., 2021
Armga1	63	Wood saprotroph	Basidiomycota	Agaricomycetes	Agaricales	Physalacriaceae	Armillaria	Armillaria gallica	Armillaria gallica 21-2 v1.0	https://mycocosm.jgi.doe.gov/Armga1/Armga1.home.html	wood_saprotroph(white rot)	Sipos G et al., 2017
Armcep1	64	Wood saprotroph	Basidiomycota	Agaricomycetes	Agaricales	Physalacriaceae	Armillaria	Armillaria cepistipes	Armillaria cepistipes B5	https://mycocosm.jgi.doe.gov/Armcep1/Armcep1.home.html	wood_saprotroph(root-rot, pathogen )	Sipos G et al., 2017
Armnab1	65	Wood saprotroph	Basidiomycota	Agaricomycetes	Agaricales	Physalacriaceae	Armillaria	Armillaria nabsnona	Armillaria nabsnona CMW6904 v1.0	https://mycocosm.jgi.doe.gov/Armnab1/Armnab1.home.html	wood_saprotroph(white rot)	Sahu N et al., 2023
Armost1	66	Pathogen	Basidiomycota	Agaricomycetes	Agaricales	Physalacriaceae	Armillaria	Armillaria ostoyae	Armillaria ostoyae C18/9	https://mycocosm.jgi.doe.gov/Armost1/Armost1.home.html	root pathogen	Sipos G et al., 2017
Armosto1	67	Wood saprotroph	Basidiomycota	Agaricomycetes	Agaricales	Physalacriaceae	Armillaria	Armillaria solidipes	Armillaria solidipes 28-4 v1.0	https://mycocosm.jgi.doe.gov/Armosto1/Armosto1.home.html	wood_saprotroph(root-rot )	Sipos G et al., 2017
Armbor1	68	Wood saprotroph	Basidiomycota	Agaricomycetes	Agaricales	Physalacriaceae	Armillaria	Armillaria borealis	Armillaria borealis FPL87.14 v1.0	https://mycocosm.jgi.doe.gov/Armbor1/Armbor1.home.html	wood_saprotroph (slightly pathogen)	Sahu N et al., 2023
Armfum1	69	Wood saprotroph	Basidiomycota	Agaricomycetes	Agaricales	Physalacriaceae	Armillaria	Armillaria fumosa	Armillaria fumosa CBS 122221 v1.0	https://mycocosm.jgi.doe.gov/Armfum1/Armfum1.home.html	wood_saprotroph(root-rot )	Sahu N et al., 2023
Armlut1	70	Litter saprotroph	Basidiomycota	Agaricomycetes	Agaricales	Physalacriaceae	Armillaria	Armillaria luteobubalina	Armillaria luteobubalina HWK02 v1.0	https://mycocosm.jgi.doe.gov/Armlut1/Armlut1.home.html	litter_saprotroph (pathogen)	Sahu N et al., 2023
Armnov1	71	Pathogen	Basidiomycota	Agaricomycetes	Agaricales	Physalacriaceae	Armillaria	Armillaria novae-zelandiae	Armillaria novae-zelandiae 2840 v1.0	https://mycocosm.jgi.doe.gov/Armnov1/Armnov1.home.html	root pathogen	Sahu N et al., 2023
Armme1_1	72	Pathogen	Basidiomycota	Agaricomycetes	Agaricales	Physalacriaceae	Armillaria	Armillaria mellea	Armillaria mellea DSM 3731	https://mycocosm.jgi.doe.gov/Armme1_1/Armme1_1.home.html	root pathogen	Collins C et al., 2013
Armect1	73	Litter saprotroph	Basidiomycota	Agaricomycetes	Agaricales	Physalacriaceae	Desarmillaria	Armillaria ectypa	Armillaria ectypa FPL83.16 v1.0	https://mycocosm.jgi.doe.gov/Armect1/Armect1.home.html	litter_saprotroph		PRJNA463936	SAMN09074775
Armtab1	74	Wood saprotroph	Basidiomycota	Agaricomycetes	Agaricales	Physalacriaceae	Desarmillaria	Armillaria tabescens	Armillaria tabescens CCBAS 213 v1.0	https://mycocosm.jgi.doe.gov/Armtab1/Armtab1.home.html	wood_saprotroph (slightly pathogen)	Sahu N et al., 2023
Guyne1	75	Wood saprotroph	Basidiomycota	Agaricomycetes	Agaricales	Physalacriaceae	Guyanagaster	Guyanagaster necrorhizus	Guyanagaster necrorhizus MCA 3950 v1.0	https://mycocosm.jgi.doe.gov/Guyne1/Guyne1.home.html	wood_saprotroph	Koch RA et al., 2021
Hymrad1	76	Wood saprotroph	Basidiomycota	Agaricomycetes	Agaricales	Physalacriaceae	Hymenopellis	Hymenopellis radicata	Hymenopellis radicata IJFM A160 v1.0	https://mycocosm.jgi.doe.gov/Hymrad1/Hymrad1.home.html	wood_saprotroph	Ruiz-Dueas FJ et al., 2021
Oudmuc1	77	Wood saprotroph	Basidiomycota	Agaricomycetes	Agaricales	Physalacriaceae	Mucidula	Oudemansiella mucida	Oudemansiella mucida CBS 558.79 v1.0	https://mycocosm.jgi.doe.gov/Oudmuc1/Oudmuc1.home.html	wood_saprotroph (white_rot)	Ruiz-Dueas FJ et al., 2021
Cylto1	78	Wood saprotroph	Basidiomycota	Agaricomycetes	Agaricales	Physalacriaceae	Cylindrobasidium	Cylindrobasidium torrendii	Cylindrobasidium torrendii FP15055 v1.0	https://mycocosm.jgi.doe.gov/Cylto1/Cylto1.home.html	wood_saprotroph	Floudas D et al., 2015
Rhobu1	79	Litter saprotroph	Basidiomycota	Agaricomycetes	Agaricales	Omphalotaceae	Rhodocollybia	Rhodocollybia butyracea	Rhodocollybia butyracea AH 40177 v1.0	https://mycocosm.jgi.doe.gov/Rhobu1/Rhobu1.home.html	litter_saprotroph (leaf litter)	Ruiz-Dueas FJ et al., 2021
Lenlat1	80	Wood saprotroph	Basidiomycota	Agaricomycetes	Agaricales	Omphalotaceae	Lentinula	Lentinula lateritia	Lentinula lateritia RV95-379 v1.0	https://mycocosm.jgi.doe.gov/Lenlat1/Lenlat1.home.html	wood_saprotroph (white_rot)	Sierra-Patev Sean et al., 2023
Gymlu1	81	Wood saprotroph	Basidiomycota	Agaricomycetes	Agaricales	Omphalotaceae	Collybiopsis	Gymnopus luxurians	Gymnopus luxurians v1.0	https://mycocosm.jgi.doe.gov/Gymlu1/Gymlu1.home.html	wood_saprotroph	Kohler A et al., 2015
Gyman1	82	Litter saprotroph	Basidiomycota	Agaricomycetes	Agaricales	Omphalotaceae	Gymnopus	Gymnopus androsaceus	Gymnopus androsaceus JB14 v1.0	https://mycocosm.jgi.doe.gov/Gyman1/Gyman1.home.html	litter_saprotroph	Barbi F et al., 2020
Gymear1	83	Soil saprotroph	Basidiomycota	Agaricomycetes	Agaricales	Omphalotaceae	Gymnopus	Gymnopus earleae	Gymnopus earleae GB-263.02 v1.0	https://mycocosm.jgi.doe.gov/Gymear1/Gymear1.home.html	soil_saprotroph		PRJNA340491	SAMN05720726
Ompol1	84	Wood saprotroph	Basidiomycota	Agaricomycetes	Agaricales	Omphalotaceae	Omphalotus	Omphalotus olearius	Omphalotus olearius	https://mycocosm.jgi.doe.gov/Ompol1/Ompol1.home.html	wood_saprotroph	Wawrzyn GT et al., 2012
Denbi1	85	Wood saprotroph	Basidiomycota	Agaricomycetes	Agaricales		Dendrothele	Dendrothele bispora	Dendrothele bispora CBS 962.96 v1.0	https://mycocosm.jgi.doe.gov/Denbi1/Denbi1.home.html	wood_saprotroph	Varga T et al., 2019
Marfi1	86	Litter saprotroph	Basidiomycota	Agaricomycetes	Agaricales	Marasmiaceae	Marasmius	Marasmius fiardii	Marasmius fiardii PR-910 v1.0	https://mycocosm.jgi.doe.gov/Marfi1/Marfi1.home.html	litter_saprotroph	Miyauchi S et al., 2020
MroMCA2997_1	87	Pathogen	Basidiomycota	Agaricomycetes	Agaricales	Marasmiaceae	Moniliophthora	Moniliophthora roreri	Moniliophthora roreri MCA 2997	https://mycocosm.jgi.doe.gov/MroMCA2997_1/MroMCA2997_1.home.html	plant pathogen	Meinhardt LW et al., 2014
Cysmur1	88	Pathogen	Basidiomycota	Agaricomycetes	Agaricales	Cystostereaceae	Cystostereum	Cystostereum murrayi	Cystostereum murrayi CysMur001 v1.0	https://mycocosm.jgi.doe.gov/Cysmur1/Cysmur1.home.html	plant pathogen		PRJNA334678	SAMN05445425
Mycflo1	89	Litter saprotroph	Basidiomycota	Agaricomycetes	Agaricales	Mycenaceae	Mycena	Mycena floridula	Mycena floridula CBHHK072 v1.0	https://mycocosm.jgi.doe.gov/Mycflo1/Mycflo1.home.html	litter_saprotroph	Harder et al. 2024
Schco_LoeD_1	90	Wood saprotroph	Basidiomycota	Agaricomycetes	Agaricales	Schizophyllaceae	Schizophyllum	Schizophyllum commune	Schizophyllum commune Loenen D v1.0	https://mycocosm.jgi.doe.gov/Schco_LoeD_1/Schco_LoeD_1.home.html	wood_saprotroph (white_rot)	Marian IM et al., 2022
Schrad1	91	Wood saprotroph	Basidiomycota	Agaricomycetes	Agaricales	Schizophyllaceae	Schizophyllum	Schizophyllum radiatum	Schizophyllum radiatum CBS 301.32 v1.0	https://mycocosm.jgi.doe.gov/Schrad1/Schrad1.home.html	wood_saprotroph (white-rot)
Schfas1	92	Litter saprotroph	Basidiomycota	Agaricomycetes	Agaricales	Schizophyllaceae	Schizophyllum	Schizophyllum fasciatum	Schizophyllum fasciatum CBS 267.60 v1.0	https://mycocosm.jgi.doe.gov/Schfas1/Schfas1.home.html	litter_saprotroph	Marian et al. 2024
Auramp1	93	Wood saprotroph	Basidiomycota	Agaricomycetes	Agaricales	Schizophyllaceae	Auriculariopsis	Auriculariopsis ampla	Auriculariopsis ampla NL-1724 v1.0	https://mycocosm.jgi.doe.gov/Auramp1/Auramp1.home.html	wood_saprotroph	Almsi et al., 2019
Fishe1	94	Wood saprotroph	Basidiomycota	Agaricomycetes	Agaricales	Fistulinaceae	Fistulina	Fistulina hepatica	Fistulina hepatica v1.0	https://mycocosm.jgi.doe.gov/Fishe1/Fishe1.home.html	wood_pathogen (brown-rot)	Floudas D et al., 2015
Niavib1	95	Wood saprotroph	Basidiomycota	Agaricomycetes	Agaricales	Cyphellopsidaceae	Nia	Nia vibrissa	Nia vibrissa CBS 119815 v1.0	https://mycocosm.jgi.doe.gov/Niavib1/Niavib1.home.html	wood_saprotroph		PRJNA346287	SAMN05920723
Denmi1	96	Wood saprotroph	Basidiomycota	Agaricomycetes	Agaricales		Dendrothele	Dendrothele microspora	Dendrothele microspora FP 101998 v1.0	https://mycocosm.jgi.doe.gov/Denmi1/Denmi1.home.html	wood saprotroph		PRJNA363663	SAMN06265514
Mychae1	97	Wood saprotroph	Basidiomycota	Agaricomycetes	Agaricales	Mycenaceae	Mycena	Mycena haematopus	Mycena haematopus CBHHK189 v1.0	https://mycocosm.jgi.doe.gov/Mychae1/Mychae1.home.html	wood_saprotroph	Harder et al. 2024
Mycsan1	98	Litter saprotroph	Basidiomycota	Agaricomycetes	Agaricales	Mycenaceae	Mycena	Mycena sanguinolenta	Mycena sanguinolenta CBHHK176m v1.0	https://mycocosm.jgi.doe.gov/Mycsan1/Mycsan1.home.html	litter_saprotroph	Harder et al. 2024
Mycgal1	99	Litter saprotroph	Basidiomycota	Agaricomycetes	Agaricales	Mycenaceae	Mycena	Mycena galopus	Mycena galopus ATCC-62051 v1.0	https://mycocosm.jgi.doe.gov/Mycgal1/Mycgal1.home.html	litter_saprotroph (leaf litter)	Miyauchi S et al., 2020
Mycalb1	100	Grass saprotroph	Basidiomycota	Agaricomycetes	Agaricales	Mycenaceae	Mycena	Mycena albidolilacea	Mycena albidolilacea CBHHK002 v1.0	https://mycocosm.jgi.doe.gov/Mycalb1/Mycalb1.home.html	grass-saprotroph	Harder et al. 2024
Mycoli1	101	Grass saprotroph	Basidiomycota	Agaricomycetes	Agaricales	Mycenaceae	Mycena	Mycena olivaceomarginata	Mycena olivaceomarginata CBHHK47/15 v1.0	https://mycocosm.jgi.doe.gov/Mycoli1/Mycoli1.home.html	grass_saprotroph	Harder et al. 2024
Favcal1_2	102	Wood saprotroph	Basidiomycota	Agaricomycetes	Agaricales	Mycenaceae	Favolaschia	Favolaschia claudopus	Favolaschia claudopus CIRM-BRFM 2984 v1.0	https://mycocosm.jgi.doe.gov/Favcal1_2/Favcal1_2.home.html	wood_saprotroph	Navarro et al. 2014
Mycvit1	103	Litter saprotroph	Basidiomycota	Agaricomycetes	Agaricales	Mycenaceae	Mycena	Mycena vitilis	Mycena vitilis CBHHK169m v1.0	https://mycocosm.jgi.doe.gov/Mycvit1/Mycvit1.home.html	litter_saprotroph	Harder et al. 2024
Mycpol1	104	Wood saprotroph	Basidiomycota	Agaricomycetes	Agaricales	Mycenaceae	Mycena	Mycena polygramma	Mycena polygramma CBHHK137 v1.0	https://mycocosm.jgi.doe.gov/Mycpol1/Mycpol1.home.html	wood_saprotroph	Harder et al. 2024
Mycrub1	105	Litter saprotroph	Basidiomycota	Agaricomycetes	Agaricales	Mycenaceae	Mycena	Mycena capillaripes	Mycena capillaripes Frankland 9286 v1.0	https://mycocosm.jgi.doe.gov/Mycrub1/Mycrub1.home.html	litter_saprotroph	Harder et al. 2024
Myclep1	106	Litter saprotroph	Basidiomycota	Agaricomycetes	Agaricales	Mycenaceae	Mycena	Mycena leptocephala	Mycena leptocephala CBHHK5/15 v1.0	https://mycocosm.jgi.doe.gov/Myclep1/Myclep1.home.html	litter/wood/grassland_saprotroph	Harder et al. 2024
Mycmet1	107	Litter saprotroph	Basidiomycota	Agaricomycetes	Agaricales	Mycenaceae	Mycena	Mycena metata	Mycena metata CBHHK182m v1.0	https://mycocosm.jgi.doe.gov/Mycmet1/Mycmet1.home.html	litter_saprotroph	Harder et al. 2024
Mycale1	108	Litter saprotroph	Basidiomycota	Agaricomycetes	Agaricales	Mycenaceae	Mycena	Mycena alexandri	Mycena alexandri CBHHK200 v1.0	https://mycocosm.jgi.doe.gov/Mycale1/Mycale1.home.html	litter_saprotroph	Harder et al. 2024
Mycfil1	109	Litter saprotroph	Basidiomycota	Agaricomycetes	Agaricales	Mycenaceae	Mycena	Mycena filopes	Mycena filopes CBHHK001 v1.0	https://mycocosm.jgi.doe.gov/Mycfil1/Mycfil1.home.html	litter_saprotroph	Harder et al. 2024
Mycbel1	110	Grass saprotroph	Basidiomycota	Agaricomycetes	Agaricales	Mycenaceae	Mycena	Mycena belliae	Mycena belliae CBHHK173m v1.0	https://mycocosm.jgi.doe.gov/Mycbel1/Mycbel1.home.html	grass-saprotroph	Harder et al. 2024
Myclat1	111	Grass saprotroph	Basidiomycota	Agaricomycetes	Agaricales	Mycenaceae	Mycena	Mycena latifolia	Mycena latifolia 10383 v1.0	https://mycocosm.jgi.doe.gov/Myclat1/Myclat1.home.html	grass-saprotroph	Harder et al. 2024
Mycros1	112	Litter saprotroph	Basidiomycota	Agaricomycetes	Agaricales	Mycenaceae	Mycena	Mycena rosella	Mycena rosella CBHHK067 v1.0	https://mycocosm.jgi.doe.gov/Mycros1/Mycros1.home.html	litter_saprotroph	Harder et al. 2024
Mycvul1	113	Litter saprotroph	Basidiomycota	Agaricomycetes	Agaricales	Mycenaceae	Mycena	Mycena vulgaris	Mycena vulgaris CBHHK164 v1.0	https://mycocosm.jgi.doe.gov/Mycvul1/Mycvul1.home.html	litter_saprotroph	Harder et al. 2024
Mycepi1	114	Litter saprotroph	Basidiomycota	Agaricomycetes	Agaricales	Mycenaceae	Mycena	Mycena epipterygia	Mycena epipterygia CBHHK145m v1.0	https://mycocosm.jgi.doe.gov/Mycepi1/Mycepi1.home.html	litter/wood/grassland_saprotroph	Harder et al. 2024
Myccro1	115	Litter saprotroph	Basidiomycota	Agaricomycetes	Agaricales	Mycenaceae	Mycena	Mycena crocata	Mycena crocata CBHHK184 v1.0	https://mycocosm.jgi.doe.gov/Myccro1/Myccro1.home.html	litter_saprotroph	Harder et al. 2024
Mycgale1	116	Wood saprotroph	Basidiomycota	Agaricomycetes	Agaricales	Mycenaceae	Mycena	Mycena galericulata	Mycena galericulata CBHHK162m v1.0	https://mycocosm.jgi.doe.gov/Mycgale1/Mycgale1.home.html	wood_saprotroph	Harder et al. 2024
Mycmac1	117	Wood saprotroph	Basidiomycota	Agaricomycetes	Agaricales	Mycenaceae	Mycena	Mycena maculata	Mycena maculata CBHHK188m v1.0	https://mycocosm.jgi.doe.gov/Mycmac1/Mycmac1.home.html	wood_saprotroph	Harder et al. 2024
Mycreb1	118	Litter saprotroph	Basidiomycota	Agaricomycetes	Agaricales	Mycenaceae	Mycena	Mycena rebaudengoi	Mycena rebaudengoi CBHHK068 v1.0	https://mycocosm.jgi.doe.gov/Mycreb1/Mycreb1.home.html	litter_saprotroph	Harder et al. 2024
Myc59_1	119	Litter saprotroph	Basidiomycota	Agaricomycetes	Agaricales	Mycenaceae	Mycena	Mycena sp.	Mycena sp. CBHHK59/15 v1.0	https://mycocosm.jgi.doe.gov/Myc59_1/Myc59_1.home.html	litter_saprotroph	Harder et al. 2024
Mycami1	120	Wood saprotroph	Basidiomycota	Agaricomycetes	Agaricales	Mycenaceae	Mycena	Mycena amicta	Mycena amicta BAPX v1.0	https://mycocosm.jgi.doe.gov/Mycami1/Mycami1.home.html	wood_saprotroph	Harder et al. 2024
Mycpur1	121	Grass saprotroph	Basidiomycota	Agaricomycetes	Agaricales	Mycenaceae	Mycena	Mycena pura	Mycena pura 9144 v1.0	https://mycocosm.jgi.doe.gov/Mycpur1/Mycpur1.home.html	grass-saprotroph	Harder et al. 2024
Rorror1	122	Litter saprotroph	Basidiomycota	Agaricomycetes	Agaricales	Mycenaceae	Roridomyces	Roridomyces roridus	Roridomyces roridus 9284 v1.0	https://mycocosm.jgi.doe.gov/Rorror1/Rorror1.home.html	litter_saprotroph	Harder et al. 2024
