# Supplementary material for: Comparative genomics of Agaricales reveals substrate-driven adaptive radiation and genomic innovations in the subterranean mushroom Agaricus sinodeliciosus
Source: Research Square preprint supplement (doi:10.21203/rs.3.rs-8432113/v1), 2026-02-03
Supplement: Supplementary file 4 [file Table S12 - KEGG A.sinodeliciosus 610 unique gene.xlsx]

## Sheet: uniq.gene.kegg.catalog.map.gene
map_number	map_name	gene_number	geneID,KOID,ECID
map00030	Pentose phosphate pathway	1	EVM0003657.1,K00851,2.7.1.12
map00040	Pentose and glucuronate interconversions	2	EVM0005014.1,K01051,3.1.1.11	EVM0008221.1,K00065,1.1.1.127
map00053	Ascorbate and aldarate metabolism	1	EVM0006188.1,K00103,1.1.3.8
map00230	Purine metabolism	1	EVM0002663.2,K02328,--
map00240	Pyrimidine metabolism	1	EVM0002663.2,K02328,--
map00362	Benzoate degradation	2	EVM0005922.1,K14333,4.1.1.46	EVM0004539.1,K01607,4.1.1.44
map00480	Glutathione metabolism	1	EVM0009309.2,K00799,2.5.1.18
map00511	Other glycan degradation	1	EVM0004437.1,K01206,3.2.1.51
map00520	Amino sugar and nucleotide sugar metabolism	1	EVM0005482.1,K01183,3.2.1.14
map00564	Glycerophospholipid metabolism	1	EVM0005663.1,K16368,2.7.1.174
map00621	Dioxin degradation	2	EVM0007342.1,K00480,1.14.13.1	EVM0007065.1,K00480,1.14.13.1
map00624	Polycyclic aromatic hydrocarbon degradation	2	EVM0007342.1,K00480,1.14.13.1	EVM0007065.1,K00480,1.14.13.1
map00626	Naphthalene degradation	2	EVM0007342.1,K00480,1.14.13.1	EVM0007065.1,K00480,1.14.13.1
map00627	Aminobenzoate degradation	1	EVM0005922.1,K14333,4.1.1.46
map00750	Vitamin B6 metabolism	1	EVM0006713.1,K06215,4.3.3.6
map00760	Nicotinate and nicotinamide metabolism	1	EVM0001510.1,K11121,3.5.1.-
map00770	Pantothenate and CoA biosynthesis	2	EVM0005599.1,K01922,6.3.2.51	EVM0002154.1,K00606,2.1.2.11
map00790	Folate biosynthesis	2	EVM0000263.1,K20457,6.3.2.12	EVM0002250.1,K01113,3.1.3.1
map00980	Metabolism of xenobiotics by cytochrome P450	1	EVM0009309.2,K00799,2.5.1.18
map00982	Drug metabolism - cytochrome P450	1	EVM0009309.2,K00799,2.5.1.18
map00983	Drug metabolism - other enzymes	1	EVM0009309.2,K00799,2.5.1.18
map01100	Metabolic pathways	14	EVM0005663.1,K16368,2.7.1.174	EVM0005014.1,K01051,3.1.1.11	EVM0005599.1,K01922,6.3.2.51	EVM0000263.1,K20457,6.3.2.12	EVM0006188.1,K00103,1.1.3.8	EVM0002250.1,K01113,3.1.3.1	EVM0002663.2,K02328,--	EVM0002154.1,K00606,2.1.2.11	EVM0005482.1,K01183,3.2.1.14	EVM0003657.1,K00851,2.7.1.12	EVM0007342.1,K00480,1.14.13.1	EVM0001510.1,K11121,3.5.1.-	EVM0004539.1,K01607,4.1.1.44	EVM0007065.1,K00480,1.14.13.1
map01110	Biosynthesis of secondary metabolites	3	EVM0005663.1,K16368,2.7.1.174	EVM0002154.1,K00606,2.1.2.11	EVM0003657.1,K00851,2.7.1.12
map01120	Microbial metabolism in diverse environments	5	EVM0005922.1,K14333,4.1.1.46	EVM0003657.1,K00851,2.7.1.12	EVM0007342.1,K00480,1.14.13.1	EVM0004539.1,K01607,4.1.1.44	EVM0007065.1,K00480,1.14.13.1
map01130	Biosynthesis of antibiotics	1	EVM0003657.1,K00851,2.7.1.12
map01200	Carbon metabolism	1	EVM0003657.1,K00851,2.7.1.12
map01220	Degradation of aromatic compounds	3	EVM0007342.1,K00480,1.14.13.1	EVM0004539.1,K01607,4.1.1.44	EVM0007065.1,K00480,1.14.13.1
map01524	Platinum drug resistance	1	EVM0009309.2,K00799,2.5.1.18
map02020	Two-component system	1	EVM0002250.1,K01113,3.1.3.1
map03008	Ribosome biogenesis in eukaryotes	1	EVM0005731.1,K11128,--
map03010	Ribosome	4	EVM0008679.1,K02962,--	EVM0000150.1,K02978,--	EVM0008039.1,K02934,--	EVM0004860.1,K02922,--
map03013	RNA transport	1	EVM0006317.1,K14325,--
map03015	mRNA surveillance pathway	3	EVM0004419.1,K14405,--	EVM0007685.1,K14416,--	EVM0006317.1,K14325,--
map03018	RNA degradation	1	EVM0003464.1,K12598,3.6.4.13
map03022	Basal transcription factors	1	EVM0002931.1,K02202,2.7.11.22 2.7.11.23
map03030	DNA replication	2	EVM0007687.1,K07466,--	EVM0002663.2,K02328,--
map03040	Spliceosome	1	EVM0003618.1,K12854,3.6.4.13
map03060	Protein export	1	EVM0001650.1,K09481,--
map03410	Base excision repair	2	EVM0002663.2,K02328,--	EVM0000488.1,K01247,3.2.2.21
map03420	Nucleotide excision repair	3	EVM0007687.1,K07466,--	EVM0002663.2,K02328,--	EVM0002931.1,K02202,2.7.11.22 2.7.11.23
map03430	Mismatch repair	2	EVM0007687.1,K07466,--	EVM0002663.2,K02328,--
map03440	Homologous recombination	2	EVM0007687.1,K07466,--	EVM0002663.2,K02328,--
map03460	Fanconi anemia pathway	1	EVM0007687.1,K07466,--
map04010	MAPK signaling pathway	1	EVM0006892.1,K04460,3.1.3.16
map04011	MAPK signaling pathway - yeast	4	EVM0006727.1,K19833,2.7.11.1	EVM0005486.1,K06666,--	EVM0008727.1,K06666,--	EVM0001110.1,K06630,--
map04110	Cell cycle	2	EVM0001110.1,K06630,--	EVM0002931.1,K02202,2.7.11.22 2.7.11.23
map04111	Cell cycle - yeast	2	EVM0005486.1,K06666,--	EVM0008727.1,K06666,--
map04113	Meiosis - yeast	1	EVM0005808.1,K12767,2.7.11.1
map04114	Oocyte meiosis	1	EVM0001110.1,K06630,--
map04136	Autophagy - other	1	EVM0001227.1,K08331,--
map04138	Autophagy - yeast	2	EVM0001227.1,K08331,--	EVM0005808.1,K12767,2.7.11.1
map04140	Autophagy - animal	1	EVM0001227.1,K08331,--
map04141	Protein processing in endoplasmic reticulum	1	EVM0001650.1,K09481,--
map04142	Lysosome	1	EVM0002773.1,K01279,3.4.14.9
map04145	Phagosome	1	EVM0001650.1,K09481,--
map04151	PI3K-Akt signaling pathway	1	EVM0001110.1,K06630,--
map04211	Longevity regulating pathway	1	EVM0001227.1,K08331,--
map04213	Longevity regulating pathway - multiple species	2	EVM0005808.1,K12767,2.7.11.1	EVM0001510.1,K11121,3.5.1.-
map04218	Cellular senescence	1	EVM0001872.1,K10903,--
map04390	Hippo signaling pathway	1	EVM0001110.1,K06630,--
map04391	Hippo signaling pathway - fly	2	EVM0004844.1,K16675,2.3.1.225	EVM0001110.1,K06630,--
map04714	Thermogenesis	1	EVM0008939.1,K18179,--
map04722	Neurotrophin signaling pathway	1	EVM0001110.1,K06630,--
map05034	Alcoholism	1	EVM0009267.1,K11253,--
map05110	Vibrio cholerae infection	1	EVM0001650.1,K09481,--
map05134	Legionellosis	1	EVM0007685.1,K14416,--
map05200	Pathways in cancer	1	EVM0009309.2,K00799,2.5.1.18
map05202	Transcriptional misregulation in cancer	1	EVM0009267.1,K11253,--
map05203	Viral carcinogenesis	1	EVM0001110.1,K06630,--
map05204	Chemical carcinogenesis	1	EVM0009309.2,K00799,2.5.1.18
map05225	Hepatocellular carcinoma	1	EVM0009309.2,K00799,2.5.1.18
map05322	Systemic lupus erythematosus	1	EVM0009267.1,K11253,--
map05418	Fluid shear stress and atherosclerosis	1	EVM0009309.2,K00799,2.5.1.18
