# Supplementary material for: Comparative genomics of Agaricales reveals substrate-driven adaptive radiation and genomic innovations in the subterranean mushroom Agaricus sinodeliciosus
Source: Research Square preprint supplement (doi:10.21203/rs.3.rs-8432113/v1), 2026-02-03
Supplement: Supplementary file 5 [file Table S13 - KEGG A.sinodeliciosus and A.sinodeliciosus ZRL 184 unique gene.xlsx]

## Sheet: gene_184.kegg.catalog.map.gene
map_number	map_name	gene_number	geneID,KOID,ECID
map00010	Glycolysis / Gluconeogenesis	2	A8194,K13953,1.1.1.1	EVM0004976.1,K00134,1.2.1.12
map00020	Citrate cycle (TCA cycle)	1	A0556,K00236,--
map00071	Fatty acid degradation	1	A8194,K13953,1.1.1.1
map00190	Oxidative phosphorylation	4	A7532,K02147,--	A0184,K02150,--	A6463,K00417,--	A0556,K00236,--
map00230	Purine metabolism	1	A3443,K11788,6.3.4.13 6.3.3.1
map00270	Cysteine and methionine metabolism	1	EVM0008116.2,K01011,2.8.1.1 2.8.1.2
map00330	Arginine and proline metabolism	1	EVM0008043.1,K00931,2.7.2.11
map00332	Carbapenem biosynthesis	1	EVM0008043.1,K00931,2.7.2.11
map00340	Histidine metabolism	1	EVM0004786.1,K20247,4.4.1.36
map00350	Tyrosine metabolism	1	A8194,K13953,1.1.1.1
map00400	Phenylalanine, tyrosine and tryptophan biosynthesis	1	A0099,K00766,2.4.2.18
map00510	N-Glycan biosynthesis	2	A7680,K03848,2.4.1.267	A6611,K03843,2.4.1.132 2.4.1.257
map00511	Other glycan degradation	1	A5367,K01227,3.2.1.96
map00513	Various types of N-glycan biosynthesis	1	A6611,K03843,2.4.1.132 2.4.1.257
map00514	Other types of O-glycan biosynthesis	1	A0804,K00728,2.4.1.109
map00515	Mannose type O-glycan biosynthesis	1	A0804,K00728,2.4.1.109
map00520	Amino sugar and nucleotide sugar metabolism	2	A6871,K01183,3.2.1.14	EVM0009217.1,K15920,3.2.1.37
map00621	Dioxin degradation	1	EVM0008427.1,K00480,1.14.13.1
map00624	Polycyclic aromatic hydrocarbon degradation	1	EVM0008427.1,K00480,1.14.13.1
map00625	Chloroalkane and chloroalkene degradation	1	A8194,K13953,1.1.1.1
map00626	Naphthalene degradation	2	A8194,K13953,1.1.1.1	EVM0008427.1,K00480,1.14.13.1
map00710	Carbon fixation in photosynthetic organisms	1	EVM0004976.1,K00134,1.2.1.12
map00760	Nicotinate and nicotinamide metabolism	1	EVM0009293.1,K11121,3.5.1.-
map00830	Retinol metabolism	1	A8194,K13953,1.1.1.1
map00900	Terpenoid backbone biosynthesis	1	EVM0008244.1,K00587,2.1.1.100
map00920	Sulfur metabolism	1	EVM0008116.2,K01011,2.8.1.1 2.8.1.2
map00980	Metabolism of xenobiotics by cytochrome P450	1	A8194,K13953,1.1.1.1
map00982	Drug metabolism - cytochrome P450	1	A8194,K13953,1.1.1.1
map01100	Metabolic pathways	17	A7532,K02147,--	A7680,K03848,2.4.1.267	A8194,K13953,1.1.1.1	A0099,K00766,2.4.2.18	A0184,K02150,--	A0804,K00728,2.4.1.109	A3443,K11788,6.3.4.13 6.3.3.1	A6463,K00417,--	A6611,K03843,2.4.1.132 2.4.1.257	A6871,K01183,3.2.1.14	A0556,K00236,--	EVM0008116.2,K01011,2.8.1.1 2.8.1.2	EVM0004976.1,K00134,1.2.1.12	EVM0008043.1,K00931,2.7.2.11	EVM0009217.1,K15920,3.2.1.37	EVM0008427.1,K00480,1.14.13.1	EVM0009293.1,K11121,3.5.1.-
map01110	Biosynthesis of secondary metabolites	5	A8194,K13953,1.1.1.1	A0099,K00766,2.4.2.18	A3443,K11788,6.3.4.13 6.3.3.1	A0556,K00236,--	EVM0004976.1,K00134,1.2.1.12
map01120	Microbial metabolism in diverse environments	5	A8194,K13953,1.1.1.1	A0556,K00236,--	EVM0008116.2,K01011,2.8.1.1 2.8.1.2	EVM0004976.1,K00134,1.2.1.12	EVM0008427.1,K00480,1.14.13.1
map01130	Biosynthesis of antibiotics	7	A8194,K13953,1.1.1.1	A0099,K00766,2.4.2.18	A3443,K11788,6.3.4.13 6.3.3.1	A0556,K00236,--	EVM0004976.1,K00134,1.2.1.12	EVM0008043.1,K00931,2.7.2.11	EVM0008244.1,K00587,2.1.1.100
map01200	Carbon metabolism	2	A0556,K00236,--	EVM0004976.1,K00134,1.2.1.12
map01220	Degradation of aromatic compounds	2	A8194,K13953,1.1.1.1	EVM0008427.1,K00480,1.14.13.1
map01230	Biosynthesis of amino acids	3	A0099,K00766,2.4.2.18	EVM0004976.1,K00134,1.2.1.12	EVM0008043.1,K00931,2.7.2.11
map02020	Two-component system	2	A0248,K11230,2.7.11.25	EVM0002268.1,K11233,--
map03010	Ribosome	1	A3701,K02870,--
map03013	RNA transport	1	A7402,K14326,3.6.4.-
map03015	mRNA surveillance pathway	2	A7402,K14326,3.6.4.-	A2938,K14397,--
map03040	Spliceosome	1	A6065,K06063,--
map03410	Base excision repair	1	A4218,K10773,4.2.99.18
map04011	MAPK signaling pathway - yeast	3	A0248,K11230,2.7.11.25	A1082,K09265,--	EVM0002268.1,K11233,--
map04015	Rap1 signaling pathway	1	A0568,K04630,--
map04022	cGMP-PKG signaling pathway	1	A0568,K04630,--
map04024	cAMP signaling pathway	1	A0568,K04630,--
map04062	Chemokine signaling pathway	1	A0568,K04630,--
map04066	HIF-1 signaling pathway	1	EVM0004976.1,K00134,1.2.1.12
map04071	Sphingolipid signaling pathway	1	A0568,K04630,--
map04110	Cell cycle	1	EVM0002571.2,K02603,--
map04111	Cell cycle - yeast	1	EVM0002571.2,K02603,--
map04113	Meiosis - yeast	1	EVM0002571.2,K02603,--
map04122	Sulfur relay system	1	EVM0008116.2,K01011,2.8.1.1 2.8.1.2
map04138	Autophagy - yeast	1	EVM0007940.1,K21157,2.7.11.1
map04139	Mitophagy - yeast	1	EVM0002268.1,K11233,--
map04144	Endocytosis	1	EVM0003170.1,K12190,--
map04145	Phagosome	2	A7532,K02147,--	A0184,K02150,--
map04150	mTOR signaling pathway	2	A7532,K02147,--	A0184,K02150,--
map04213	Longevity regulating pathway - multiple species	1	EVM0009293.1,K11121,3.5.1.-
map04260	Cardiac muscle contraction	1	A6463,K00417,--
map04261	Adrenergic signaling in cardiomyocytes	1	A0568,K04630,--
map04330	Notch signaling pathway	1	A6065,K06063,--
map04360	Axon guidance	1	A0568,K04630,--
map04371	Apelin signaling pathway	1	A0568,K04630,--
