# Supplementary material for: Comparative genomics of Agaricales reveals substrate-driven adaptive radiation and genomic innovations in the subterranean mushroom Agaricus sinodeliciosus
Source: Research Square preprint supplement (doi:10.21203/rs.3.rs-8432113/v1), 2026-02-03
Supplement: Supplementary file 6 [file Table S14 - Postive seleted gene of A.sinodeliciosus.xlsx]

## Sheet: Sheet2
	Null hypothesis			Alternative hypothesis
FamID	lnL	df	omega(ω=1)	lnL	df	omega(ω>1)	FDR	pos-/non-	GeneID	Gene
OG0006498	-44702.3	252	1	-44692.3	253	34.2929	8.14719511410544e-06	positive	EVM0006983.1	Hydroxyacylglutathione hydrolase (HAGH)
OG0006414	-45627.3	252	1	-45620.6	253	590.155	0.000267462123954232	positive	EVM0006353.1	Deoxycytidylate deaminase
OG0006440	-84726.9	252	1	-84722.4	253	6.70835	0.00293634729117775	positive	EVM0002730.1	Serine-tRNA ligase
OG0006683	-129083	252	1	-129079	253	219.53	0.00405563562609979	positive	EVM0002596.1	Dilute domain-containing protein
OG0006502	-103015	252	1	-103012	253	3.35876	0.0182208915763455	positive	EVM0002297.1	Translation initiation factor IF-2
OG0006114	-75675.6	252	1	-75673	253	4.48269	0.0231219750792374	positive	EVM0008282.1	Nucleolar protein 56
OG0006491	-60142.3	252	1	-60139.7	253	2.37671	0.0236671050705151	positive	EVM0008233.1	NEDD8-activating enzyme E1 catalytic subunit
OG0006505	-105601	252	1	-105598	253	172.363	0.0280340865004218	positive	EVM0000162.1	Protein kinase domain-containing protein ppk32
OG0006774	-174616	252	1	-174614	253	3.90823	0.0314855766202553	positive	EVM0000246.1	Mediator of RNA polymerase II transcription subunit 14
OG0006450	-123157	252	1	-123155	253	9.11444	0.0429977140243426	positive	EVM0008356.1	U3 small nucleolar RNA-associated protein 4
OG0006460	-37293.2	252	1	-37291.1	253	79.7804	0.0450003605169087	positive	EVM0001101.1	U2 small nuclear ribonucleoprotein A'
OG0006536	-137265	252	1	-137263	253	198.236	0.0471889126821674	positive	EVM0000573.1	Nuclear pore complex protein NUP88
Postive gene GO enrichment analysis
ID	description	namespace	level	ratio_in_pop	pvalue	FDR	Input
GO:0010467	gene expression	BP	Level-5	911/3378	0.0288674	0.77942	EVM0000573.1|EVM0001101.1|EVM0002297.1|EVM0002730.1|EVM0008282.1|EVM0008356.1
GO:1901363	heterocyclic compound binding	MF	Level-3	922/3378	0.0305785	0.412809	EVM0000162.1|EVM0001101.1|EVM0002297.1|EVM0002730.1|EVM0008282.1|EVM0008356.1
GO:0097159	organic cyclic compound binding	MF	Level-3	930/3378	0.0318684	0.286815	EVM0000162.1|EVM0001101.1|EVM0002297.1|EVM0002730.1|EVM0008282.1|EVM0008356.1
layer1	layer2	layer3	ID	Input.number	Background.number	Pvalue	FDR	Input
Genetic Information Processing	Translation	Ribosome biogenesis in eukaryotes	ko03008	2	70	0.450242	0.898116	EVM0008282.1|EVM0008356.1
Genetic Information Processing	Translation	Aminoacyl-tRNA biosynthesis	ko00970	1	33	0.52271	0.898116	EVM0002730.1
Genetic Information Processing	Folding, sorting and degradation	Ubiquitin mediated proteolysis	ko04120	1	51	0.697149	0.898116	EVM0008233.1
Genetic Information Processing	Transcription	Spliceosome	ko03040	1	88	0.898116	0.898116	EVM0001101.1
