# Supplementary material for: Comparative genomics of Agaricales reveals substrate-driven adaptive radiation and genomic innovations in the subterranean mushroom Agaricus sinodeliciosus
Source: Research Square preprint supplement (doi:10.21203/rs.3.rs-8432113/v1), 2026-02-03
Supplement: Supplementary file 7 [file Table S15 - Statistics of transcriptome sequencing data.xlsx]

## Sheet: Sheet1
Statistics of transcriptome sequencing data
Sample	Clean reads	Clean bases	Error rate (%)	Q20(%)	Q30(%)	GC content (%)
M1	46381270	6827273909	0.0259	97.64	93.36	49.29
M2	46881310	6909610293	0.0259	97.65	93.32	49.23
M3	45654896	6767777955	0.0259	97.62	93.29	49.5
P1	40581758	6011850267	0.0257	97.7	93.47	49.22
P2	42557214	6314477891	0.0263	97.5	92.99	49.41
P3	43306186	6403444521	0.0262	97.49	93	49.74
CFB1	40860114	6045853825	0.0257	97.69	93.48	49.5
CFB2	47323966	6964386115	0.0256	97.75	93.63	49.94
CFB3	48429494	7110627116	0.0256	97.75	93.63	49.85
