# Supplementary material for: Comparative genomics of Agaricales reveals substrate-driven adaptive radiation and genomic innovations in the subterranean mushroom Agaricus sinodeliciosus
Source: Research Square preprint supplement (doi:10.21203/rs.3.rs-8432113/v1), 2026-02-03
Supplement: Supplementary file 8 [file Table S16 - A. sinodelicousus DEGs related to transcription factor.xlsx]

## Sheet: Sheet1
Table S12 DEGs related to transcription factor
Gene ID	Family	InterPro	Description	TPM			MvsP			PvsCFB
				M	P	CFB	Log2FC	Padjust	Regulate	Log2FC	Padjust	Regulate
EVM0003028	GATA type zinc finger	IPR000679	Zinc finger, GATA-type	113.12	39.8567	58.83	-1.6089	4.85338e-11	down
EVM0004962	bZIP	IPR011616	bZIP transcription factor, bZIP-1	163.303	14.8133	23.46	-3.58126	2.8464e-26	down
EVM0004520	HMG	IPR009071	High mobility group, superfamily	2.77333	0.956667	1.08333	-1.6051	0.000433051	down
EVM0007446	Homeobox	IPR001356	Homeobox	113.443	56.8333	69.5667	-1.09992	1.17875e-06	down
EVM0007852	C2H2 zinc finger	IPR007087	Zinc finger, C2H2-type	38.26	18.2467	18.8733	-1.17834	0.000957565	down
EVM0004403	C2H2 zinc finger	IPR007087	Zinc finger, C2H2-type	15.5433	0.903333	1.05333	-4.23308	2.10836e-09	down
EVM0006691	Fungal_trans	IPR007219		698.603	100.297	152.78	-2.87909524261	2.56474e-18	down
EVM0007764	Fungal_trans	IPR007219		74.2233	23.56	27.7333	-1.73777	3.95344e-08	down
EVM0006955	Heat shock factor (HSF)-type, DNA-binding		Heat shock factor	14.5733	49.8533	43.5533	1.68211	4.47042e-06	up
EVM0008024	GATA type zinc finger	IPR000679	Zinc finger, GATA-type	32.66	75.5567	63.24	1.12728	2.11347e-07	up
EVM0004420	White collar 2 protein	IPR000679	Zinc finger, GATA-type	53.95	441.397	361.283	2.90645	6.63386e-08	up
EVM0008818	CCR4-Not complex component, Not1	IPR007196	The Ccr4-Not complex is a global regulator of transcription that affec..	13.04	33.17	25.2	1.24405	0.00117588	up
EVM0002249	CCR4-Not complex component, Not1	IPR007196	The Ccr4-Not complex is a global regulator of transcription that affec..	27.3633	61.5767	52.0967	1.09028	0.00141832	up
EVM0007157	C2H2 zinc finger	IPR007087	Zinc finger, C2H2-type	35.3867	84.0633	74.7367	1.1254	0.000173745	up
EVM0005428	C2H2 zinc finger	IPR007087	Zinc finger, C2H2-type	0	17.6233	10.6767	10.7359	1.16552e-12	up
EVM0001962	C2H2 zinc finger	IPR007087	Zinc finger, C2H2-type	6.52667	36.5733	28.0467	2.39066	4.96794e-06	up
EVM0002461	Forkhead	IPR001766	Transcription factor, fork head	19.57	43.1567	32.8633	1.04087	0.0125514	up
EVM0000087	Fungal_trans	IPR007219		11.4133	115.39	96.96	3.26215	2.49669e-31	up
EVM0002042	Fungal_trans	IPR007219		11.1667	37.1433	31.1533	1.63949	0.000129516	up
EVM0003186	Fungal_trans	IPR007219		4.02	14.0533	12.17	1.71517	5.60203e-07	up
EVM0004175	Fungal_trans	IPR007219		30.4767	180.52	103.777	2.47511	5.42232e-29	up
EVM0005740	Fungal_trans	IPR007219		9.85333	50.84	35.1867	2.27987513665	5.97482e-17	up
EVM0007878	Fungal_trans	IPR007219		12.0067	150.25	66.2567	3.56553	1.45287e-17	up
EVM0004902	bZIP	IPR011616	bZIP transcription factor, bZIP-1	32.6267	2.95333	13.6867	-3.61177	3.03063e-08	down
EVM0000747	HMG	IPR009071	High mobility group, superfamily	95.6567	45.3133	75.76	-1.20006480585	0.000327843	down
EVM0007171	C2H2 zinc finger	IPR007087	Zinc finger, C2H2-type	91.1133	22.3433	88.8167	-2.13406	7.90072e-09	down
EVM0001778	Homeobox	IPR001356	Homeobox	11.2233	5.89333	3.83	-1.02607	0.000650426	down
EVM0000683	HMG	IPR009071	High mobility group, superfamily	184.44	87.1033	54.5233	-1.16704618525	0.0352085044565	down
EVM0003882	C2H2 zinc finger	IPR007087	Zinc finger, C2H2-type	357.8	72.33	12.39	-2.38498531972	2.1588e-10	down	-2.52253	0.000302926	down
EVM0004663	C2H2 zinc finger	IPR007087	Zinc finger, C2H2-type	812.953	354.603	193.39	-1.29178	0.000835789681289	down
EVM0003724	C2H2 zinc finger	IPR007087	Zinc finger, C2H2-type	657.623	294.23	162.893	-1.25052	0.00945045490875	down
EVM0001143	Fungal_trans	IPR007219		27.7967	10.1367	6.10667	-1.51058	0.0321527	down
EVM0005402	Fungal_trans	IPR007219		592.733	260.6	84.4967	-1.28625	0.0407031365149	down
EVM0000987	HMG	IPR009071	High mobility group, superfamily	238.16	113.87	380.567	-1.17994	0.0259631	down
EVM0009393	C2H2 zinc finger	IPR007087	Zinc finger, C2H2-type	47.0733	16.9567	89.1267	-1.55065007608	6.93245e-05	down	2.58504637279	0.0152385	up
EVM0005374	C2H2 zinc finger	IPR007087	Zinc finger, C2H2-type	30.8467	12.0633	59.2433	-1.44695	1.99973e-06	down	2.49244	0.00438659	up
EVM0000238	Zinc finger, PARP-type	IPR001510	Zinc finger, PARP-type	2.11667	20.0067	4.34667	3.16864603007	3.5965e-05	up
EVM0005298	Zinc finger, PARP-type	IPR001510	Zinc finger, PARP-type	5.18333	29.98	14.0433	2.45001601954	1.03986e-08	up
EVM0006672	GATA type zinc finger	IPR000679	Zinc finger, GATA-type	30.15	75.2633	45.1267	1.23301	0.0322993670916	up
EVM0007068	CCR4-Not complex component, Not1	IPR007196	The Ccr4-Not complex is a global regulator of transcription that affec..	24.9733	60.2667	40.1133	1.17927514187	0.00179927	up
EVM0000067	bZIP	IPR011616	bZIP transcription factor, bZIP-1	62.8133	181.513	72.0533	1.42173	1.79031e-05	up
EVM0004001	HMG	IPR009071	High mobility group, superfamily	0.2	54.7833	4.98667	8.00642899546	8.78303e-15	up	-3.23271151732	0.0293177	down
EVM0002453	Homeobox	IPR001356	Homeobox	117.127	714.35	284.847	2.50995	6.99901e-12	up
EVM0005491	Helix-turn-helix, Psq	IPR007889	Helix-turn-helix, Psq	41.34	95.8367	61.6333	1.12174	0.000261518	up
EVM0005106	C2H2 zinc finger	IPR007087	Zinc finger, C2H2-type	7.30667	136.433	30.0667	4.16341283263	3.03886e-10	up
EVM0001065	C2H2 zinc finger	IPR007087	Zinc finger, C2H2-type	11.1567	39.1767	17.58	1.69002	0.00740499	up
EVM0008649	C2H2 zinc finger	IPR007087	Zinc finger, C2H2-type	24.2333	334.397	111.953	3.71378	9.52121e-09	up
EVM0001506	C2H2 zinc finger	IPR007087	Zinc finger, C2H2-type	0.64	1.68	1.06667	1.30038157564	0.0117983531715	up
EVM0006848	TEA/ATTS	IPR000818	TEA/ATTS	1.52333	119.36	11.2	6.19599	4.36983e-14	up
EVM0000540	Fungal_trans	IPR007219		51.0933	125.42	68.2367	1.22058	0.0053824	up
EVM0004170	Fungal_trans	IPR007219		87.7733	215.267	122.28	1.20722834961	0.000333293	up
EVM0009344	TEA/ATTS	IPR000818	TEA/ATTS	395.6	332.143	13.9867				-4.60388	0.00565687	down
EVM0003148	Fungal_trans	IPR007219		52.69	96.66	15.0933				-2.68008	0.00109127	down
EVM0009036	Homeodomain-like	IPR009057	Homeodomain-like	0.99	2.95333	30.8633	1.47968284884	0.0103215990073	up	3.62057	0.000741587	up
EVM0007200	C2H2 zinc finger	IPR007087	Zinc finger, C2H2-type	11.1333	9.45667	68.3				2.96564108986	0.000424036	up
EVM0008290	Zinc finger, CCHC-type	IPR001878	Zinc finger, CCHC-type	0.0766667	2.49333	5.23333	5.02005	1.48695e-05	up
EVM0006008	Transcription factor jumonji	IPR013129	Transcription factor jumonji	8.32	21.46	21.68	1.27034	5.86289e-07	up
EVM0006877	Homeobox	IPR001356	Homeobox	20.8867	244.573	221.707	3.44577	2.07043e-63	up
EVM0004933	Fungal_trans	IPR007219		11.2	26.6667		1.1572	3.60659e-06	up
EVM0006200	Fungal_trans	IPR007219		35.4433	76.6733		1.03528	0.0437872	up
EVM0003056	Homeobox	IPR001356	Homeobox	10.63	4.94667		-1.1878	4.53035e-06	down
EVM0009377	bZIP	IPR011616	bZIP transcription factor, bZIP-1	141.41	44.69	34.14	-1.73314	0.00151505	down
EVM0003473	Helix-turn-helix, Psq	IPR007889	Helix-turn-helix, Psq	1600.49	231.58	150.683	-2.93193	0.000195586	down
EVM0007043	C2H2 zinc finger	IPR007087	Zinc finger, C2H2-type	5.06667	1.66333	1.45333	-1.7231	0.000156111	down
EVM0006684	C2H2 zinc finger	IPR007087	Zinc finger, C2H2-type	66.8267	34.16	31.6733	-1.07798	0.0107834	down
EVM0002742	C2H2 zinc finger	IPR007087	Zinc finger, C2H2-type	61.7267	4.88	1.99	-3.73473	3.51105e-12	down
EVM0002679	Forkhead	IPR001766	Transcription factor, fork head	283.173	54.48	30.2967	-2.46129825628	4.80734e-17	down
EVM0001565	Fungal_trans	IPR007219		55.4	28.3867	25.26	-1.05324	0.000547608	down
