# Supplementary material for: Comparative genomics of Agaricales reveals substrate-driven adaptive radiation and genomic innovations in the subterranean mushroom Agaricus sinodeliciosus
Source: Research Square preprint supplement (doi:10.21203/rs.3.rs-8432113/v1), 2026-02-03
Supplement: Supplementary file 9 [file Table S2 - Hi-C assembly data statistics.xlsx]

## Sheet: Sheet1
Table S2 Hi-C assembly data statistics
Group	Sequence Number	Sequence Length (bp)
Lachesis Group 1	3	4484904
Lachesis Group 2	1	3530826
Lachesis Group 3	2	3560049
Lachesis Group 4	1	3200916
Lachesis Group 5	1	3109859
Lachesis Group 6	1	2869033
Lachesis Group 7	1	2650674
Lachesis Group 8	3	2039942
Lachesis Group 9	1	1848152
Lachesis Group 10	1	1744113
Lachesis Group 11	1	1729834
Lachesis Group 12	1	1378180
Total Sequences Clustered (Ratio %)	17 (15.32)	32,146,482 (88.39)
Total Sequences Ordered and Oriented (Ratio %)	17 (100)	32,146,482 (100)
