# Supplementary material for: Comparative genomics of Agaricales reveals substrate-driven adaptive radiation and genomic innovations in the subterranean mushroom Agaricus sinodeliciosus
Source: Research Square preprint supplement (doi:10.21203/rs.3.rs-8432113/v1), 2026-02-03
Supplement: Supplementary file 10 [file Table S3 - 95_Agaricales_PERMANOVA_INPUT.xlsx]

## Sheet: Table S3 - 95_Agaricales_PERMAN
Table S3 - PERMANOVA input for 95 Agaricales fungi
JGI.Fungal.ID	PC1	PC2	PC3	PC4	PC5	PC6	CladeOrder	SpeciesName	Ecology	Phylum	Class	Order	Family	Genus	Genome.size	TotalTE.cover.Percent	TotalTE.cover.Mbp	Num.Gene	Num.Scaffold	Scaffold.N50	Scaffold.L50.Mbp	Secret.protein	Total.protein	CompleteBUSCO	ComplelteBUSCO.single.copy	CompleteBUSCO.duplicate	FrangmentedBUSCO	MissingBUSCO	Total.BUSCO.group	BEL/Pao	CRE/SLACS	DNA_transposons	En-Spm	Gypsy/DIRS1	hobo-Activator	L1/CIN4	L2/CR1/Rex	LINEs	Low_complexity	LTR_elements	MuDR-IS905	Other	Penelope	PiggyBac	R1/LOA/Jockey	R2/R4/NeSL	Retroelements	Retroviral	Rolling-circles
Phocon1	0.926822	0.2144	0.218413	0.106212	0.13734	-0.0655085	1	Pholiota conissans	Wood saprotroph	Basidiomycota	Agaricomycetes	Agaricales	Strophariaceae	Pholiota	43955553	8.8	3.86867	16589	1558	114	0.1	942	16589	99.5	98.8	0.7	0.4	0.1	1764	0	0	0.01	0	0.22	0	0.01	0	0.23	0.11	0.39	0	0	0	0	0	0	0.63	0	0
Phosp1	0.926822	0.2144	0.218413	0.106212	0.13734	-0.0655085	2	Pholiota sp.	Wood saprotroph	Basidiomycota	Agaricomycetes	Agaricales	Strophariaceae	Pholiota	86484769	16.64	14.3902	18143	897	119	0.21	1071	18143	97.2	93.5	3.7	0.2	2.6	1764	0.01	0	0.26	0	2.67	0.07	0	0	0.31	0.11	3.93	0	0	0.01	0	0	0	4.32	0.19	0.1
Phohig1	0.927032	0.214416	0.218258	0.10608	0.137034	-0.0652848	3	Pholiota molesta	Soil saprotroph	Basidiomycota	Agaricomycetes	Agaricales	Strophariaceae	Pholiota	66044324	14.22	9.38944	17825	701	65	0.25	1094	17825	96.2	85.3	10.9	0.9	2.9	1764	0	0	0.15	0	1.66	0	0.07	0	0.16	0.11	4.26	0	0	0	0	0	0	4.42	0	0.07
Hypsu1	0.927433	0.214445	0.21794	0.105813	0.136417	-0.0648331	4	Hypholoma sublateritium	Wood saprotroph	Basidiomycota	Agaricomycetes	Agaricales	Strophariaceae	Hypholoma	48031814	6.65	3.19634	17911	1329	44	0.3	976	17911	99.4	98.3	1.1	0.3	0.3	1764	0	0	0.27	0	0.43	0	0	0	0.11	0.08	0.84	0	0	0	0	0.02	0	0.95	0	0
Phoaln1	0.928006	0.214481	0.217455	0.105407	0.135481	-0.0641497	5	Pholiota alnicola	Soil saprotroph	Basidiomycota	Agaricomycetes	Agaricales	Strophariaceae	Flammula	75008219	16.7	12.5268	18795	976	93	0.21	1036	18795	97.4	89.9	7.5	1	1.6	1764	0.09	0	0.77	0	2.58	0.16	0	0	1.61	0.09	3.93	0	0	0	0	0	0	5.54	0	0.2
Hebvel2	0.92845	0.214481	0.21692	0.104968	0.13447	-0.0634099	6	Hebeloma brunneifolium	Ectomycorrhiza	Basidiomycota	Agaricomycetes	Agaricales	Hymenogastraceae	Hebeloma	65279695	22.95	14.9847	20438	76	13	1.51	1013	20438	99.7	97.6	2.1	0.1	0.2	1764	0.01	0	1.68	0	2.98	0.03	0	0	0.04	0.07	4.74	0	0	0.04	0	0	0	4.78	0	0.68
Hebcy2	0.92845	0.214481	0.21692	0.104968	0.13447	-0.0634099	7	Hebeloma cylindrosporum	Ectomycorrhiza	Basidiomycota	Agaricomycetes	Agaricales	Hymenogastraceae	Hebeloma	38226047	4.79	1.83113	15382	526	12	1.07	641	15382	98.8	97.7	1.1	0.7	0.5	1764	0	0	0	0	0.92	0	0	0	0	0.1	1.29	0	0	0	0	0	0	1.29	0	0.04
Psicub1_1	0.927367	0.214427	0.217917	0.105798	0.136383	-0.064807	8	Psilocybe cubensis	Grass saprotroph	Basidiomycota	Agaricomycetes	Agaricales	Strophariaceae	Psilocybe	41302601	7.96	3.28726	13361	4194	84	0.13	949	13361	98.4	97.8	0.6	0.7	0.9	1764	0	0	0.17	0	0.95	0	0	0	0.18	0.2	1.93	0	0	0.06	0	0	0	2.11	0	0
Psiser1	0.927367	0.214427	0.217917	0.105798	0.136383	-0.064807	9	Psilocybe serbica	Litter saprotroph	Basidiomycota	Agaricomycetes	Agaricales	Strophariaceae	Psilocybe	61285081	26.09	15.9903	15481	217	9	2.01	1159	15481	99.1	98.1	1	0.2	0.7	1764	0.01	0	0.43	0	3.65	0.13	0	0	3.08	0.11	9.89	0	0	0	0	0	0	12.96	0	0
Agrped1	0.927367	0.214427	0.217917	0.105798	0.136383	-0.064807	10	Agrocybe pediades	Grass saprotroph	Basidiomycota	Agaricomycetes	Agaricales	Strophariaceae	Agrocybe	45056484	9.74	4.38951	17281	2369	107	0.1	1156	17281	99.1	98.6	0.5	0.4	0.5	1764	0	0	0.07	0	0.53	0	0	0	0.18	0.15	0.7	0	0	0	0	0	0	0.88	0	0
Agrpra2	0.927367	0.214427	0.217917	0.105798	0.136383	-0.064807	11	Agrocybe praecox	Litter saprotroph	Basidiomycota	Agaricomycetes	Agaricales	Strophariaceae	Agrocybe	46411657	17.76	8.24469	12993	508	32	0.35	883	12993	98.4	96.5	1.9	0.2	1.4	1764	0.01	0	2.11	0	3.41	0.2	0	0	0	0.1	8.03	0	0	0	0	0	0	8.03	0	0.4
Gymch1	0.927702	0.214438	0.217575	0.105514	0.135728	-0.0643272	12	Gymnopilus chrysopellus	Wood saprotroph	Basidiomycota	Agaricomycetes	Agaricales	Hymenogastraceae	Gymnopilus	47223541	2.73	1.29076	18193	2046	210	0.06	1064	18193	98.3	97.8	0.5	0.9	0.8	1764	0.02	0	0.1	0	0.09	0	0	0	0.1	0.13	0.15	0	0	0	0	0.03	0	0.25	0	0.01
Gymjun1	0.927702	0.214438	0.217575	0.105514	0.135728	-0.0643272	13	Gymnopilus junonius	Wood saprotroph	Basidiomycota	Agaricomycetes	Agaricales	Hymenogastraceae	Gymnopilus	59461163	16.03	9.53425	16444	1174	95	0.15	913	16444	96.5	93.7	2.8	1.5	2	1764	0	0	0.56	0	4	0.17	0	0	1.52	0.14	7.98	0	0	0.28	0	0	0	9.5	0.04	0.15
Galma1	0.927916	0.214456	0.217421	0.105384	0.135427	-0.0641075	14	Galerina marginata	Wood saprotroph	Basidiomycota	Agaricomycetes	Agaricales	Strophariaceae	Galerina	59418196	10.29	6.11637	21461	1272	15	1.22	1360	21461	99.3	97.8	1.5	0.6	0.1	1764	0	0	0.04	0	0.62	0.04	0	0	0.7	0.11	1.41	0	0	0	0	0.08	0	2.11	0	0.15
Crafun1	0.935512	0.213971	0.205421	0.0956389	0.113006	-0.0476646	15	Crassisporium funariophilum	Soil saprotroph	Basidiomycota	Agaricomycetes	Agaricales	Crassisporiaceae	Crassisporium	37117181	10.36	3.84498	13637	41	7	2.16	950	13637	99.7	98.9	0.8	0.2	0.1	1764	0.11	0	0.99	0	1.36	0.5	0	0	0.48	0.16	2.75	0	0	0	0	0	0	3.23	0	0.19
Corgl3	0.935512	0.213971	0.205421	0.0956389	0.113006	-0.0476646	16	Phlegmacium glaucopus	Ectomycorrhiza	Basidiomycota	Agaricomycetes	Agaricales	Cortinariaceae	Phlegmacium	63450306	33.92	21.5239	20377	2103	42	0.43	729	20377	99.5	97.7	1.8	0.1	0.4	1764	0.06	0	1.09	0	4.91	0.6	0	0	0.76	0.07	9.88	0	0	0	0	0	0	10.65	0	0.18
Crevar1	0.93254	0.211983	0.198384	0.0898475	0.0975015	-0.0345283	17	Crepidotus variabilis	Wood saprotroph	Basidiomycota	Agaricomycetes	Agaricales	Crepidotaceae	Crepidotus	38577924	4.91	1.8952	14573	1097	31	0.32	1044	14573	99.5	99	0.5	0.2	0.3	1764	0	0	0.01	0	0.8	0.01	0	0	0.61	0.07	1.39	0	0	0	0	0	0	2	0	0
Creces1	0.93254	0.211983	0.198384	0.0898475	0.0975015	-0.0345283	18	Crepidotus cesatii	Wood saprotroph	Basidiomycota	Agaricomycetes	Agaricales	Crepidotaceae	Crepidotus	36042615	7.57	2.72879	12891	235	23	0.51	994	12891	98.4	96.5	1.9	0.3	1.3	1764	0	0	0.44	0	1.72	0	0	0	0.44	0.08	2.89	0	0	0	0	0.05	0	3.33	0	0.02
Inolan1	0.932808	0.212021	0.198258	0.0897442	0.0972997	-0.0344062	19	Inosperma lanatodiscum	Wood saprotroph	Basidiomycota	Agaricomycetes	Agaricales	Inocybaceae	Inosperma	123813904	41.75	51.6878	23215	1501	256	0.14	1060	23215	96	84.5	11.5	0.4	3.6	1764	0.01	0	2.63	0	13.9	0.47	0	0	0.25	0.05	18.78	0	0	0	0	0	0	19.03	0.06	0.62
Phapla1	0.933321	0.212091	0.198	0.0895343	0.0968912	-0.0341595	20	Phaeosolenia platensis	Wood saprotroph	Basidiomycota	Agaricomycetes	Agaricales	Chromocyphellaceae	Phaeosolenia	59053793	9.74	5.75471	16000	721	49	0.27	1126	16000	91.6	87.3	4.3	2.3	6.1	1764	0	0	0.29	0	1.82	0.01	0	0	0	0.15	3.08	0	0	0	0	0	0	3.08	0	0
Panpap1	0.934063	0.21219	0.197604	0.0892148	0.0962715	-0.0337861	21	Panaeolus papilionaceus	Grass saprotroph	Basidiomycota	Agaricomycetes	Agaricales	Galeropsidaceae	Panaeolus	50889730	15.39	7.8312	17466	79	11	1.82	1203	17466	98.7	97.7	1	0.9	0.4	1764	0.04	0	0.54	0	2.95	0	0	0	0.91	0.13	4.74	0	0	0	0	0	0	5.65	0.04	0
Conapa1	0.942802	0.211369	0.181017	0.076309	0.0691351	-0.0157083	22	Conocybe apala	Grass saprotroph	Basidiomycota	Agaricomycetes	Agaricales	Bolbitiaceae	Conocybe	64080092	4.61	2.95619	17284	2441	227	0.06	1441	17284	95.7	86.5	9.2	1.2	3.1	1764	0	0	0.2	0	0.39	0.04	0	0	0.05	0.16	0.56	0	0	0	0	0	0	0.61	0	0
Bolvit1	0.942802	0.211369	0.181017	0.076309	0.0691351	-0.0157083	23	Bolbitius vitellinus	Grass saprotroph	Basidiomycota	Agaricomycetes	Agaricales	Bolbitiaceae	Bolbitius	51241791	23.49	12.0379	14483	428	20	0.7	986	14483	96.3	92.2	4.1	1.8	1.9	1764	0.01	0	0.6	0	2.21	0	0	0	8.54	0.12	3.06	0	0	0	0	0	0	11.6	0	0
Copci1	0.923075	0.202547	0.1581	0.0537726	-0.0317366	0.184903	24	Coprinopsis cinerea	Litter saprotroph	Basidiomycota	Agaricomycetes	Agaricales	Psathyrellaceae	Coprinopsis	36294355	7.27	2.63755	13393	68	5	3.47	918	13393	97.6	97.1	0.5	1.5	0.9	1764	0	0	0.04	0	3.32	0	0	0	0	0.15	4.46	0	0	0	0	0	0	4.46	0	0
Copscl1	0.923075	0.202547	0.1581	0.0537726	-0.0317366	0.184903	25	Coprinopsis sclerotiger	Grass saprotroph	Basidiomycota	Agaricomycetes	Agaricales	Psathyrellaceae	Coprinopsis	30495150	3.23	0.984452	12039	305	28	0.28	892	12039	99.1	98.8	0.3	0.5	0.4	1764	0.01	0	0	0	0.53	0	0	0	0	0.11	0.81	0	0	0	0	0	0	0.82	0	0
Copmar1	0.923397	0.202607	0.158016	0.0537219	-0.031616	0.184262	26	Coprinopsis marcescibilis	Grass saprotroph	Basidiomycota	Agaricomycetes	Agaricales	Psathyrellaceae	Coprinopsis	38912666	9.8	3.8137	14632	1269	75	0.13	990	14632	99.2	98.6	0.6	0.5	0.3	1764	0	0	0.32	0	2.58	0	0.03	0	0.41	0.08	3.25	0	0	0	0	0	0	3.69	0	0.03
Coppel1	0.923075	0.202547	0.1581	0.0537726	-0.0317366	0.184903	27	Coprinellus pellucidus	Grass saprotroph	Basidiomycota	Agaricomycetes	Agaricales	Psathyrellaceae	Coprinellus	41561493	3.17	1.31692	16047	2262	109	0.09	1182	16047	98.8	98.1	0.7	0.5	0.7	1764	0	0	0.19	0	0	0	0	0	0	0.15	0.12	0	0	0	0	0	0	0.13	0	0.07
Copang1	0.923075	0.202547	0.1581	0.0537726	-0.0317366	0.184903	28	Coprinellus angulatus	Litter saprotroph	Basidiomycota	Agaricomycetes	Agaricales	Psathyrellaceae	Tulosesus	93565539	15.05	14.0858	25937	517	56	0.48	1898	25937	98.3	85	13.3	0.4	1.3	1764	0.01	0	0.29	0	1.58	0.05	0	0	0.38	0.16	3.77	0	0	0	0	0.05	0	4.15	0	0.17
Copmic2	0.923397	0.202607	0.158016	0.0537219	-0.031616	0.184262	29	Coprinellus micaceus	Litter saprotroph	Basidiomycota	Agaricomycetes	Agaricales	Psathyrellaceae	Coprinellus	77386123	13.4	10.3676	23559	704	55	0.32	1221	23559	97.7	89.4	8.3	0.8	1.5	1764	0.01	0	0.35	0	3.05	0.13	0	0	2.06	0.14	4.91	0	0	0	0	0	0	6.97	0	0
Lacam2	0.926134	0.203087	0.157042	0.0531563	-0.0303469	0.177322	30	Laccaria amethystina	Ectomycorrhiza	Basidiomycota	Agaricomycetes	Agaricales	Hydnangiaceae	Laccaria	52581404	27.6	14.5131	17553	1999	112	0.12	716	17553	99.3	98	1.3	0.5	0.2	1764	0.04	0	0.51	0	1.86	0.11	0	0	0.12	0.09	4.68	0	0	0	0	0	0	4.81	0	0.16
Lacbi2	0.926134	0.203087	0.157042	0.0531563	-0.0303469	0.177322	31	Laccaria bicolor	Ectomycorrhiza	Basidiomycota	Agaricomycetes	Agaricales	Hydnangiaceae	Laccaria	60707050	31.67	19.2275	23132	584	5	4.31	853	23132	99.4	96.8	2.6	0.5	0.1	1764	0	0	1.79	0	3.49	0.33	0.02	0	0.34	0.1	7.14	0	0	0	0	0	0	7.47	0.07	0.52
Cyapal1	0.912989	0.189001	0.0932788	0.000253695	-0.171874	0.176938	32	Cyathus pallidus	Wood saprotroph	Basidiomycota	Agaricomycetes	Agaricales	Nidulariaceae	Cyathus	158824083	28.37	45.0637	32880	235	23	2.58	2433	32880	96.9	81.9	15	0.2	2.9	1764	0	0	1.61	0	4.14	0.48	0.05	0	0.32	0.13	8.57	0	0	0.04	0	0	0	8.9	0.01	0.86
Cyaste1	0.912989	0.189001	0.0932788	0.000253695	-0.171874	0.176938	33	Cyathus stercoreus	Grass saprotroph	Basidiomycota	Agaricomycetes	Agaricales	Nidulariaceae	Cyathus	202911832	20.56	41.7227	33641	421	37	1.9	2539	33641	94.7	84	10.7	0.5	4.8	1764	0	0	0.78	0	2.39	0.13	0.2	0	0.34	0.16	5.95	0	0	0	0	0	0	6.35	0	0.21
Cyastr2	0.913437	0.189109	0.0932646	0.000283953	-0.17138	0.176306	34	Cyathus striatus	Wood saprotroph	Basidiomycota	Agaricomycetes	Agaricales	Nidulariaceae	Cyathus	91180015	28.16	25.6798	23513	1562	90	0.2	1405	23513	96.7	93.1	3.6	1.3	2	1764	0	0	1.5	0	2.8	0.58	0.08	0	0.26	0.12	5.07	0	0	0	0	0	0	5.33	0	0.14
Mycden1	0.915086	0.189507	0.0931866	0.000405432	-0.169318	0.173644	35	Mycocalia denudata	Wood saprotroph	Basidiomycota	Agaricomycetes	Agaricales	Nidulariaceae	Mycocalia	72666472	14.9	10.8258	13474	194	11	2.72	947	13474	99.5	97.4	2.1	0.2	0.3	1764	0	0	0.86	0	2.17	0.23	0.4	0	0.59	0.16	3.41	0	0	0	0	0.03	0	4.18	0	0.47
Nidsp1	0.914309	0.18932	0.0932331	0.000344609	-0.170382	0.175027	36	Nidula sp.	Wood saprotroph	Basidiomycota	Agaricomycetes	Agaricales	Nidulariaceae	Nidula	127756706	31.38	40.0909	17885	333	43	0.89	1322	17885	96	91	5	0.2	3.8	1764	0.5	0	3.1	0	8.25	0.68	0.04	0	0.22	0.13	11.7	0	0	0.06	0	0	0	11.92	0	0.68
Crula1	0.915086	0.189507	0.0931866	0.000405432	-0.169318	0.173644	37	Crucibulum laeve	Wood saprotroph	Basidiomycota	Agaricomycetes	Agaricales	Nidulariaceae	Crucibulum	44728771	13.49	6.03222	14218	1536	19	0.63	1051	14218	99.5	98.4	1.1	0.3	0.2	1764	0	0	0.29	0	2.5	0.09	0	0	0	0.09	4.34	0	0	0	0	0	0	4.34	0	0.22
Agabi_varbisH97_2	0.897704	0.174788	0.027454	-0.0502919	-0.260398	-0.113353	38	Agaricus bisporus H97	Grass saprotroph	Basidiomycota	Agaricomycetes	Agaricales	Agaricaceae	Agaricus	30233745	12.33	3.72677	10438	254	6	2.3	555	10438	94.1	93.4	0.7	0.6	5.3	1764	0	0	0.29	0	3.24	0	0	0	1.7	0.1	5.81	0	0	0.23	0	0	0	7.51	0	0
Agabi_varbur_1	0.897704	0.174788	0.027454	-0.0502919	-0.260398	-0.113353	39	Agaricus bisporus	Grass saprotroph	Basidiomycota	Agaricomycetes	Agaricales	Agaricaceae	Agaricus	32614401	14.28	4.65762	11289	254	6	2.3	560	11289	94.2	93.5	0.7	0.9	4.9	1764	0	0	0.3	0	2.08	0	0	0.01	3.73	0.1	5.01	0	0	0.05	0	0.47	0	8.73	0	0
Agasi1	0.898291	0.174947	0.0275032	-0.0501882	-0.259654	-0.112889	40	Agaricus sinodeliciosus	Grass saprotroph	Basidiomycota	Agaricomycetes	Agaricales	Agaricaceae	Agaricus	36370291	30.47	11.0804	9466	NA	NA	2.8	542	9466	97.9	95.5	2.4	0.7	1.4	1764	0	0	0.56	0	11.34	0.01	0	0	4.72	0.08	16.66	0	0	0.15	0	0	0	21.38	0	0
Macfu1	0.898832	0.175097	0.0275505	-0.0500796	-0.258868	-0.112397	41	Macrolepiota fuliginosa	Litter saprotroph	Basidiomycota	Agaricomycetes	Agaricales	Agaricaceae	Macrolepiota	46396944	21.53	9.98926	15801	4852	199	0.05	995	15801	98.6	97.4	1.2	0.6	0.8	1764	0.01	0	0.04	0	2.22	0.01	0	0	5.73	0.07	5.43	0	0	0	0	0.02	0	11.15	0	0.05
Lycper1	0.898832	0.175097	0.0275505	-0.0500796	-0.258868	-0.112397	42	Lycoperdon perlatum	Litter saprotroph	Basidiomycota	Agaricomycetes	Agaricales	Lycoperdaceae	Lycoperdon	64634788	25.83	16.6926	17855	1192	64	0.21	1090	17855	95.8	92.4	3.4	1.1	3.1	1764	0.01	0	0.95	0	4.08	0.57	0	0	1.14	0.08	6.21	0	0	0	0	0.04	0	7.35	0	0.11
Amaapr1	0.883751	0.163221	-0.0299974	-0.0861575	-0.234392	-0.19497	43	Amanita muscaria	Ectomycorrhiza	Basidiomycota	Agaricomycetes	Agaricales	Amanitaceae	Amanita	110261529	47.39	52.2578	15793	316	15	2.17	681	15793	98.6	96.8	1.8	0.5	0.9	1764	0.09	0	3.61	0	17.54	0.53	0	0	1.61	0.04	24.47	0	0	0.03	0	0.02	0	26.08	0.18	0.43
Amamu1	0.883751	0.163221	-0.0299974	-0.0861575	-0.234392	-0.19497	44	Amanita muscaria Koide	Ectomycorrhiza	Basidiomycota	Agaricomycetes	Agaricales	Amanitaceae	Amanita	40699759	17.61	7.16852	18153	3814	54	0.17	651	18153	98.8	97.4	1.4	0.6	0.6	1764	0	0	0.2	0	2.37	0.01	0	0	0.5	0.06	3.16	0	0	0	0	0.01	0	3.66	0	0.08
Amarub1	0.884506	0.16344	-0.0298997	-0.0860059	-0.233702	-0.194156	45	Amanita rubescens	Ectomycorrhiza	Basidiomycota	Agaricomycetes	Agaricales	Amanitaceae	Amanita	76593165	34.48	26.4055	16076	817	102	0.16	821	16076	97.8	87.4	10.4	0.6	1.6	1764	0	0	1.59	0	5.76	0.8	0.03	0	0.37	0.04	9.78	0	0	0.02	0	0.01	0	10.16	0.03	0.24
Amath1	0.885991	0.163874	-0.0297025	-0.0856975	-0.232303	-0.192506	46	Amanita thiersii	Ectomycorrhiza	Basidiomycota	Agaricomycetes	Agaricales	Amanitaceae	Amanita	33689220	26.84	9.04219	10354	2164	95	0.08	649	10354	99	98.9	0.1	0.5	0.5	1764	0	0	0	0	13.88	0	0	0	2.77	0.14	19.05	0	0	0	0	0	0	21.82	0	0
Trima3	0.781589	0.10765	-0.249367	-0.532434	0.152401	0.0278352	47	Tricholoma matsutake	Ectomycorrhiza	Basidiomycota	Agaricomycetes	Agaricales	Tricholomataceae	Tricholoma	175759688	59.5	104.576	22885	16714	167	0.32	678	22885	97.6	95.5	2.1	1	1.4	1764	0.21	0	2.62	0	24.17	0.37	0.02	0	4.21	0.03	33.19	0	0	0.01	0	0.01	0	37.39	0.01	0.83
Tripop1	0.781589	0.10765	-0.249367	-0.532434	0.152401	0.0278352	48	Tricholoma populinum	Ectomycorrhiza	Basidiomycota	Agaricomycetes	Agaricales	Tricholomataceae	Tricholoma	136995582	56.01	76.7265	19692	496	45	0.68	913	19692	99.3	95.1	4.2	0.4	0.3	1764	0.03	0	3.63	0	13.19	1.18	0.42	0	3.97	0.06	19.66	0	0	0	0	0.02	0	23.63	0.03	1.01
Lepnud1	0.782269	0.107864	-0.249137	-0.531677	0.15202	0.0277495	49	Lepista nuda	Litter saprotroph	Basidiomycota	Agaricomycetes	Agaricales	Clitocybaceae	Collybia	43493018	8.68	3.77615	14880	2234	49	0.27	1102	14880	99.1	97.9	1.2	0.7	0.2	1764	0	0	0.03	0	2.38	0	0.1	0	0.49	0.07	3.36	0	0	0.04	0	0.01	0	3.85	0.04	0.05
Lyoat1	0.781589	0.10765	-0.249367	-0.532434	0.152401	0.0278352	50	Lyophyllum atratum	Soil saprotroph	Basidiomycota	Agaricomycetes	Agaricales	Lyophyllaceae	Lyophyllum	64896558	8.32	5.40103	15046	171	15	1.21	1026	15046	99	92.2	6.8	0.6	0.4	1764	0	0	0.3	0	2.46	0.1	0	0	0.14	0.16	4.2	0	0	0	0	0	0	4.34	0.03	0.16
TerJ132_1	0.781589	0.10765	-0.249367	-0.532434	0.152401	0.0278352	51	Termitomyces sp.	Grass saprotroph	Basidiomycota	Agaricomycetes	Agaricales	Lyophyllaceae	Termitomyces	67296805	49.72	33.4599	11143	3818	83	0.27	462	11143	94.4	93.4	1	2.2	3.4	1764	0	0	1.06	0	23.88	0	0	0	1.49	0.05	30.72	0	0	0	0	0	0	32.22	0	1.57
Hypma1	0.782269	0.107864	-0.249137	-0.531677	0.15202	0.0277495	52	Hypsizygus marmoreus	Wood saprotroph	Basidiomycota	Agaricomycetes	Agaricales	Lyophyllaceae	Hypsizygus	41626055	7.51	3.12611	15561	983	20	0.63	909	15561	98.6	97.7	0.9	0.6	0.8	1764	0	0	0.1	0	1.36	0	0	0	0	0.11	2.59	0	0	0	0	0	0	2.59	0	0.33
Cligib1	0.789426	0.110191	-0.246405	-0.522804	0.147594	0.0267483	53	Clitocybe gibba	Litter saprotroph	Basidiomycota	Agaricomycetes	Agaricales		Infundibulicybe	65973163	24.07	15.8767	19049	1258	82	0.18	1360	19049	96.4	94.1	2.3	1.1	2.5	1764	0.08	0	0.68	0	3.71	0.07	0	0	0.26	0.04	6.8	0	0	0.01	0	0	0	7.06	0	0.21
Plucer1	0.857572	0.14679	-0.151932	-0.112903	-0.0920591	-0.0572058	54	Pluteus cervinus	Wood saprotroph	Basidiomycota	Agaricomycetes	Agaricales	Pluteaceae	Pluteus	52193021	5.97	3.11794	19818	3329	119	0.1	994	19818	99.4	98	1.4	0.5	0.1	1764	0.03	0	0.04	0	0.11	0	0	0	0	0.09	0.14	0	0	0	0	0	0	0.14	0	0.09
Volvo1	0.857572	0.14679	-0.151932	-0.112903	-0.0920591	-0.0572058	55	Volvariella volvacea	Grass saprotroph	Basidiomycota	Agaricomycetes	Agaricales	Pluteaceae	Volvariella	35720033	7.11	2.54066	11084	1289	9	0.93	678	11084	92.7	92.4	0.3	2	5.3	1764	0	0	0.16	0	1.34	0.06	0	0	0.1	0.12	1.55	0	0	0	0	0.02	0	1.65	0	0.29
Radcon1	0.620066	0.0184163	-0.709067	0.319329	0.0560069	0.0156645	56	Radulomyces confluens	Wood saprotroph	Basidiomycota	Agaricomycetes	Agaricales	Radulomycetaceae	Radulomyces	43247665	8.37	3.62114	15506	36	6	2.51	1079	15506	99	97	2	0.5	0.5	1764	0	0	0.43	0	1.03	0	0	0	0	0.12	1.76	0	0	0	0	0	0	1.76	0	0.13
Aphpse1	0.620066	0.0184163	-0.709067	0.319329	0.0560069	0.0156645	57	Aphanobasidium pseudotsugae	Wood saprotroph	Basidiomycota	Agaricomycetes	Agaricales	Radulomycetaceae	Aphanobasidium	32195292	15.97	5.14249	11120	159	21	0.54	688	11120	98.4	97.8	0.6	0.3	1.3	1764	0	0	0.33	0	7.4	0.04	0	0	0.44	0.07	9.65	0	0	0	0	0	0	10.09	0	0
Ptegra1	0.62082	0.0186877	-0.708628	0.318933	0.0558932	0.0156269	58	Pterula gracilis	Grass saprotroph	Basidiomycota	Agaricomycetes	Agaricales	Pterulaceae	Pterula	34769099	8.73	3.03548	12873	852	13	0.64	1017	12873	99	98	1	0.4	0.6	1764	0	0	0.09	0	4.7	0	0	0	0	0.17	5.82	0	0	0	0	0	0	5.93	0.12	0
Hygcoc2	0.621536	0.0189585	-0.708121	0.318497	0.055768	0.0155847	59	Hygrocybe coccinea	Grass saprotroph	Basidiomycota	Agaricomycetes	Agaricales	Hygrophoraceae	Hygrocybe	166368867	60	99.818	24431	1833	299	0.18	785	24431	95.7	81.3	14.4	0.8	3.5	1764	0.72	0	6.23	0	15.15	0.79	0	0	0.35	0.05	20.43	0	0	0.04	0	0.01	0	20.79	0.09	2.85
Crison1	0.621536	0.0189585	-0.708121	0.318497	0.055768	0.0155847	60	Cristinia sonorae	Pathogen	Basidiomycota	Agaricomycetes	Agaricales	Stephanosporaceae	Cristinia	30130434	4.91	1.47945	11356	114	16	0.65	699	11356	98.8	98.5	0.3	0.1	1.1	1764	0	0	0.33	0	0.61	0.04	0	0	0	0.11	1.26	0	0	0	0	0	0	1.26	0	0.02
PleosPC9_1	0.625858	0.0205982	-0.705024	0.31584	0.0550044	0.0153261	61	Pleurotus ostreatus	Wood saprotroph	Basidiomycota	Agaricomycetes	Agaricales	Pleurotaceae	Pleurotus	35630309	3.49	1.2435	12206	3272	NA	NA	877	12206	97.4	96.3	1.1	1.2	1.4	1764	0.01	0	0.03	0	0.83	0	0	0	0.09	0.09	1.04	0	0	0	0	0	0	1.13	0	0
Pleery1	0.625858	0.0205982	-0.705024	0.31584	0.0550044	0.0153261	62	Pleurotus eryngii	Wood saprotroph	Basidiomycota	Agaricomycetes	Agaricales	Pleurotaceae	Pleurotus	44606964	21.62	9.64303	15960	1684	54	0.24	946	15960	99.3	98.1	1.2	0.3	0.4	1764	0.03	0	1.92	0	8.44	0.17	0.02	0	0.51	0.06	10.55	0	0	0.04	0	0	0	11.06	0	0.35
Armga1	-0.848318	0.508089	0.0455192	0.00956928	0.012453	0.00544845	63	Armillaria gallica	Wood saprotroph	Basidiomycota	Agaricomycetes	Agaricales	Physalacriaceae	Armillaria	85336812	24.31	20.7493	25704	1529	22	1.04	1280	25704	99.5	96.6	2.9	0.1	0.4	1764	0.01	0	0.04	0	8.88	0.04	0	0	0.16	0.03	10.44	0	0	0	0	0	0	10.6	0	0.29
Armcep1	-0.848318	0.508089	0.0455192	0.00956928	0.012453	0.00544845	64	Armillaria cepistipes	Wood saprotroph	Basidiomycota	Agaricomycetes	Agaricales	Physalacriaceae	Armillaria	75828441	26.21	19.8778	23460	346	8	3.29	1151	23460	97.2	95	2.2	0.7	2.1	1764	0.01	0	0.41	0	8.86	0.18	0	0.14	0.44	0.03	11.34	0	0	0	0	0.03	0	11.78	0	0.33
Armnab1	-0.848396	0.508155	0.0455129	0.00956786	0.0124482	0.00544393	65	Armillaria nabsnona	Wood saprotroph	Basidiomycota	Agaricomycetes	Agaricales	Physalacriaceae	Armillaria	62718798	21.19	13.2923	19015	85	9	2.69	1269	19015	99.3	97.2	2.1	0.3	0.4	1764	0	0	0.17	0	7.95	0	0	0	0.01	0.03	9.59	0	0	0	0	0	0	9.61	0	0.24
Armost1	-0.848318	0.508089	0.0455192	0.00956928	0.012453	0.00544845	66	Armillaria ostoyae	Pathogen	Basidiomycota	Agaricomycetes	Agaricales	Physalacriaceae	Armillaria	58009494	12.35	7.16387	20811	693	21	0.72	1178	20811	99.6	97.5	2.1	0.2	0.2	1764	0	0	0	0	2.78	0	0	0	0.14	0.04	3.42	0	0	0	0	0	0	3.56	0	0
Armosto1	-0.848318	0.508089	0.0455192	0.00956928	0.012453	0.00544845	67	Armillaria solidipes	Wood saprotroph	Basidiomycota	Agaricomycetes	Agaricales	Physalacriaceae	Armillaria	60106801	17.69	10.6313	22705	106	9	2.28	1156	22705	97.6	96.2	1.4	0.9	1.5	1764	0	0	0.12	0	7.01	0.01	0	0	0.37	0.03	8.03	0	0	0.13	0	0.02	0	8.39	0	0
Armbor1	-0.848396	0.508155	0.0455129	0.00956786	0.0124482	0.00544393	68	Armillaria borealis	Wood saprotroph	Basidiomycota	Agaricomycetes	Agaricales	Physalacriaceae	Armillaria	71689880	16.86	12.0865	19984	864	50	0.36	1321	19984	98.3	95.2	3.1	0.6	1.1	1764	0	0	0.04	0	4.93	0.03	0	0	0.2	0.04	6.01	0	0	0	0	0	0	6.2	0	0
Armfum1	-0.848449	0.508239	0.0454508	0.00955168	0.0124027	0.00540627	69	Armillaria fumosa	Wood saprotroph	Basidiomycota	Agaricomycetes	Agaricales	Physalacriaceae	Armillaria	55824865	24.18	13.4963	16095	54	7	3.85	1160	16095	99.4	97.3	2.1	0.2	0.4	1764	0	0	0	0	15.58	0	0	0	0.27	0.03	18.18	0	0	0	0	0	0	18.46	0	0.14
Armlut1	-0.848449	0.508239	0.0454508	0.00955168	0.0124027	0.00540627	70	Armillaria luteobubalina	Litter saprotroph	Basidiomycota	Agaricomycetes	Agaricales	Physalacriaceae	Armillaria	97106278	30.38	29.4965	20318	439	28	0.84	1361	20318	99	93.3	5.7	0.3	0.7	1764	0	0	0.77	0	11.9	0.21	0.12	0	0.71	0.03	15.12	0	0	0	0	0.04	0	15.94	0	0.54
Armnov1	-0.848531	0.508309	0.045445	0.00955045	0.0123985	0.00540215	71	Armillaria novae-zelandiae	Pathogen	Basidiomycota	Agaricomycetes	Agaricales	Physalacriaceae	Armillaria	79334843	35.29	28.0007	18551	427	26	0.74	1215	18551	98.5	95.4	3.1	0.3	1.2	1764	0	0	0.55	0	14.72	0.1	0.15	0	0.7	0.03	17.51	0	0	0.2	0	0	0	18.4	0	1.22
Armme1_1	-0.848678	0.50844	0.0454324	0.00954776	0.0123896	0.00539365	72	Armillaria mellea	Pathogen	Basidiomycota	Agaricomycetes	Agaricales	Physalacriaceae	Armillaria	79545241	13.83	11.0038	14473	36822	680	0.02	872	14473	82.9	82	0.9	5.6	11.5	1764	0	0	0.06	0	3.75	0.02	0	0	0.08	0.03	4.14	0	0	0	0	0.05	0	4.22	0.01	0.06
Armect1	-0.849329	0.509239	0.0451579	0.00948114	0.0122014	0.00523351	73	Armillaria ectypa	Litter saprotroph	Basidiomycota	Agaricomycetes	Agaricales	Physalacriaceae	Desarmillaria	40598130	19.35	7.85748	12228	33	5	4.05	900	12228	99.3	97.5	1.8	0.2	0.5	1764	0	0	0	0	11.8	0	0	0	0.02	0.03	14.89	0	0	0	0	0	0	14.9	0	0
Armtab1	-0.849329	0.509239	0.0451579	0.00948114	0.0122014	0.00523351	74	Armillaria tabescens	Wood saprotroph	Basidiomycota	Agaricomycetes	Agaricales	Physalacriaceae	Desarmillaria	74875987	21.75	16.2892	19032	659	33	0.54	1276	19032	98.4	94.9	3.5	0.5	1.1	1764	0	0	0.27	0	10.56	0.02	0	0	0.15	0.03	12.92	0	0	0	0	0	0	13.07	0.01	0
Guyne1	-0.850111	0.510194	0.0449818	0.00944496	0.0121003	0.00514182	75	Guyanagaster necrorhizus	Wood saprotroph	Basidiomycota	Agaricomycetes	Agaricales	Physalacriaceae	Guyanagaster	53686691	36.84	19.7794	14276	656	15	1.34	784	14276	98.8	97.2	1.6	0.6	0.6	1764	0	0	0.54	0	24.66	0	0	0	0.1	0.03	28.61	0	0	0.06	0	0	0	28.71	0	0
Hymrad1	-0.848681	0.509108	0.0446925	0.00935932	0.0118715	0.00496627	76	Hymenopellis radicata	Wood saprotroph	Basidiomycota	Agaricomycetes	Agaricales	Physalacriaceae	Hymenopellis	78586887	17.37	13.6525	27481	1968	195	0.1	1370	27481	94.7	85	9.7	1.3	4	1764	0.05	0	0.16	0	1.77	0	0	0	0.16	0.05	4.93	0	0	0	0	0	0	5.1	0	0.02
Oudmuc1	-0.848681	0.509108	0.0446925	0.00935932	0.0118715	0.00496627	77	Oudemansiella mucida	Wood saprotroph	Basidiomycota	Agaricomycetes	Agaricales	Physalacriaceae	Mucidula	61732987	19.83	12.2416	18562	1386	107	0.12	1122	18562	95.5	89.7	5.8	1	3.5	1764	0.01	0	0.69	0	7.9	0.38	0	0	0.18	0.04	10.68	0	0	0.06	0	0	0	10.86	0	0
Cylto1	-0.848797	0.509216	0.0446919	0.00936006	0.0118728	0.00496625	78	Cylindrobasidium torrendii	Wood saprotroph	Basidiomycota	Agaricomycetes	Agaricales	Physalacriaceae	Cylindrobasidium	31574086	2.16	0.680961	13940	1222	94	0.09	862	13940	99.6	97.8	1.8	0.3	0.1	1764	0.01	0	0.01	0	0	0.01	0	0	0	0.06	0.01	0	0	0	0	0	0	0.01	0	0
Rhobu1	-0.841354	0.5025	0.0432238	0.00885452	0.0101532	0.00312952	79	Rhodocollybia butyracea	Litter saprotroph	Basidiomycota	Agaricomycetes	Agaricales	Omphalotaceae	Rhodocollybia	78814333	23.87	18.8104	19884	1836	166	0.11	1416	19884	97.5	94	3.5	0.6	1.9	1764	0.02	0	0.45	0	3.25	0.05	0.05	0	0.94	0.06	7.92	0	0	0.04	0	0	0	8.86	0	0
Lenlat1	-0.841354	0.5025	0.0432238	0.00885452	0.0101532	0.00312952	80	Lentinula lateritia	Wood saprotroph	Basidiomycota	Agaricomycetes	Agaricales	Omphalotaceae	Lentinula	45430989	29.52	13.412	13354	214	42	0.37	1045	13354	99.4	97.9	1.5	0.1	0.5	1764	0	0	0.63	0	16.51	0.05	0.1	0	0.75	0.07	20.36	0	0	0	0	0.09	0	21.11	0	0.23
Gymlu1	-0.841474	0.502615	0.0432247	0.00885597	0.0101583	0.00313497	81	Gymnopus luxurians	Wood saprotroph	Basidiomycota	Agaricomycetes	Agaricales	Omphalotaceae	Collybiopsis	66281680	19.47	12.9082	22057	1848	30	0.64	1429	22057	99.1	97.5	1.6	0.5	0.4	1764	0.04	0	0.42	0	3.28	0	0	0	0.02	0.09	5.78	0	0	0	0	0	0	5.8	0.04	0
Gyman1	-0.841568	0.502711	0.0432235	0.0088569	0.0101624	0.00314	82	Gymnopus androsaceus	Litter saprotroph	Basidiomycota	Agaricomycetes	Agaricales	Omphalotaceae	Gymnopus	89149538	29.22	26.051	29375	2519	144	0.17	1556	29375	97.4	91.8	5.6	1	1.6	1764	0.03	0	1.09	0	3.47	0.09	0	0	0.35	0.06	10	0	0	0	0	0	0	10.36	0.02	0.14
Gymear1	-0.841568	0.502711	0.0432235	0.0088569	0.0101624	0.00314	83	Gymnopus earleae	Soil saprotroph	Basidiomycota	Agaricomycetes	Agaricales	Omphalotaceae	Gymnopus	91673264	38.09	34.9212	25530	245	33	0.9	1469	25530	99.3	96.4	2.9	0.2	0.5	1764	0	0	3.3	0	4.86	0.84	0.35	0	0.51	0.07	11.91	0	0	0.01	0	0	0	12.43	0.07	0.35
Ompol1	-0.842299	0.503446	0.0432225	0.00886552	0.0101957	0.0031775	84	Omphalotus olearius	Wood saprotroph	Basidiomycota	Agaricomycetes	Agaricales	Omphalotaceae	Omphalotus	28145093	1.41	0.397898	8171	1535	37	0.2	535	8171	90.1	89.5	0.6	3.4	6.5	1764	0	0	0	0	0.13	0	0	0	0	0.1	0.13	0	0	0	0	0	0	0.13	0	0
Denbi1	-0.842756	0.503932	0.0432177	0.0088708	0.0102183	0.00320398	85	Dendrothele bispora	Wood saprotroph	Basidiomycota	Agaricomycetes	Agaricales		Dendrothele	130650616	36.49	47.6808	33645	6351	302	0.12	1754	33645	99.4	92.1	7.3	0.5	0.1	1764	0.07	0	1.1	0	3.58	0.18	0	0	0.49	0.11	8.68	0	0	0.1	0	0	0	9.17	0.01	0.39
Marfi1	-0.842985	0.50425	0.0431924	0.00887017	0.0102286	0.00322474	86	Marasmius fiardii	Litter saprotroph	Basidiomycota	Agaricomycetes	Agaricales	Marasmiaceae	Marasmius	59447912	24.13	14.3472	17098	2986	43	0.32	1246	17098	99.4	98.1	1.3	0.3	0.3	1764	0	0	0.37	0	8.98	0	0	0	3.49	0.05	11.23	0	0	0	0	0	0	14.74	0	0.07
MroMCA2997_1	-0.842985	0.50425	0.0431924	0.00887017	0.0102286	0.00322474	87	Moniliophthora roreri	Pathogen	Basidiomycota	Agaricomycetes	Agaricales	Marasmiaceae	Moniliophthora	52057512	14.15	7.36607	15415	3062	271	0.05	1282	15415	98.8	97.4	1.4	0.5	0.7	1764	0	0	0	0	6.01	0	0	0	0.01	0.05	6.84	0	0	0	0	0	0	6.85	0	0
Cysmur1	-0.850335	0.511389	0.0443976	0.00931482	0.0117597	0.00485341	88	Cystostereum murrayi	Pathogen	Basidiomycota	Agaricomycetes	Agaricales	Cystostereaceae	Cystostereum	32382358	4.99	1.61659	13196	24	7	1.95	761	13196	98.7	97.6	1.1	0.4	0.9	1764	0	0	0.03	0	0.26	0.02	0	0	0.03	0.06	1.06	0	0	0	0	0	0	1.1	0	0.07
Schco_LoeD_1	-0.271658	-0.922643	0.25602	0.031435	0.0327951	0.0122328	90	Schizophyllum commune	Wood saprotroph	Basidiomycota	Agaricomycetes	Agaricales	Schizophyllaceae	Schizophyllum	35882427	2.74	0.982829	13827	1822	194	0.05	822	13827	97.1	96.5	0.6	1.1	1.8	1764	0.01	0	0.01	0	0	0	0	0	0	0.15	0.01	0	0	0	0	0	0	0.01	0	0
Schrad1	-0.271658	-0.922643	0.25602	0.031435	0.0327951	0.0122328	91	Schizophyllum radiatum	Wood saprotroph	Basidiomycota	Agaricomycetes	Agaricales	Schizophyllaceae	Schizophyllum	65761430	5.04	3.31493	17979	4177	553	0.03	1020	17979	93.7	80.3	13.4	3.2	3.1	1764	0.01	0	0.09	0	0.7	0.09	0	0	0.05	0.18	1.16	0	0	0	0	0	0	1.21	0	0
Schfas1	-0.271666	-0.922665	0.256023	0.0314349	0.0327933	0.0122314	92	Schizophyllum fasciatum	Litter saprotroph	Basidiomycota	Agaricomycetes	Agaricales	Schizophyllaceae	Schizophyllum	30435173	4.35	1.32483	11722	2808	99	0.09	750	11722	91.6	89.1	2.5	4.3	4.1	1764	0	0	0	0	0.77	0	0	0	0	0.18	0.96	0	0	0	0	0	0	0.96	0	0
Auramp1	-0.271674	-0.92268	0.25602	0.0314332	0.0327879	0.0122276	93	Auriculariopsis ampla	Wood saprotroph	Basidiomycota	Agaricomycetes	Agaricales	Schizophyllaceae	Auriculariopsis	49873921	9.42	4.6986	15576	351	19	0.54	827	15576	97.5	93.8	3.7	0.7	1.8	1764	0.01	0	0.09	0	1.4	0.06	0	0	0	0.15	2.85	0	0	0	0	0	0	2.85	0	0
Fishe1	-0.271676	-0.922666	0.256005	0.0314292	0.0327775	0.0122209	94	Fistulina hepatica	Wood saprotroph	Basidiomycota	Agaricomycetes	Agaricales	Fistulinaceae	Fistulina	33847808	13.01	4.40365	11244	914	27	0.35	469	11244	98.2	96.5	1.7	0.3	1.5	1764	0	0	0.18	0	3.42	0	0	0	0.04	0.04	7.71	0	0	0	0	0	0	7.75	0	0
Niavib1	-0.271619	-0.922411	0.255901	0.0314102	0.0327397	0.0121983	95	Nia vibrissa	Wood saprotroph	Basidiomycota	Agaricomycetes	Agaricales	Cyphellopsidaceae	Nia	26355186	8.31	2.18968	10400	1408	60	0.09	635	10400	97.3	96.5	0.8	0.6	2.1	1764	0	0	0	0	2.11	0	0.08	0	0.09	0.09	3.01	0	0	0	0	0	0	3.1	0	0
Denmi1	-0.271619	-0.922411	0.255901	0.0314102	0.0327397	0.0121983	96	Dendrothele microspora	Wood saprotroph	Basidiomycota	Agaricomycetes	Agaricales		Dendrothele	45655992	3.48	1.58708	17356	1106	67	0.16	1284	17356	98.8	97.4	1.4	0.4	0.8	1764	0.04	0	0	0	0.14	0	0	0	0	0.06	0.39	0	0	0	0	0	0	0.39	0	0.16
[truncated: 25 more columns]
