# Supplementary material for: Comparative genomics of Agaricales reveals substrate-driven adaptive radiation and genomic innovations in the subterranean mushroom Agaricus sinodeliciosus
Source: Research Square preprint supplement (doi:10.21203/rs.3.rs-8432113/v1), 2026-02-03
Supplement: Supplementary file 11 [file Table S4 - 95_Agaricales_PERMANOVA.xlsx]

## Sheet: Table S4 - 95_Agaricales_PERMAN
Table S4 - PERMANOVA results with 95 Agaricales fungi
GenomicFeature	Variables	DegreeOfFreedom	SumOfSquares	R2	F.stats	P.value
CAZyme	PC1	1	0.386735	0.0509322	8.56092	7e-04
CAZyme	PC2	1	0.269207	0.035454	5.95927	0.005
CAZyme	Ecology	5	2.54742	0.33549	11.2782	1e-04
CAZyme	DNA_transposons	1	0.265567	0.0349746	5.87869	0.0053
CAZyme	LTR_elements	1	0.0817023	0.01076	1.8086	0.147
CAZyme	LINEs	1	0.00857557	0.00112938	0.189832	0.8906
CAZyme	Unclassified	1	0.284444	0.0374607	6.29657	0.0033
CAZyme	Residual	83	3.74948	0.493799	NA	NA
CAZyme	Total	94	7.59313	1	NA	NA
Genome	PC1	1	0.0297494	0.00751712	1.5839	0.2022
Genome	PC2	1	0.256139	0.0647215	13.6372	2e-04
Genome	Ecology	5	0.214952	0.0543143	2.28887	0.0395
Genome	DNA_transposons	1	1.22407	0.309299	65.1711	1e-04
Genome	LTR_elements	1	0.0251206	0.00634748	1.33745	0.2437
Genome	LINEs	1	0.000100443	2.5380076141242e-05	0.00534773	0.9967
Genome	Unclassified	1	0.648491	0.163861	34.5265	1e-04
Genome	Residual	83	1.55894	0.393914	NA	NA
Genome	Total	94	3.95756	1	NA	NA
Lipase	PC1	1	0.691227	0.0728809	9.49282	2e-04
Lipase	PC2	1	0.534573	0.0563637	7.34145	0.0011
Lipase	Ecology	5	1.2872	0.135718	3.5355	8e-04
Lipase	DNA_transposons	1	0.470873	0.0496474	6.46663	0.0019
Lipase	LTR_elements	1	0.107927	0.0113795	1.4822	0.2097
Lipase	LINEs	1	0.0531266	0.0056015	0.729603	0.4862
Lipase	Unclassified	1	0.295706	0.0311784	4.06102	0.0163
Lipase	Residual	83	6.04371	0.63723	NA	NA
Lipase	Total	94	9.48434	1	NA	NA
Protease	PC1	1	0.103857	0.0170394	1.73088	0.1684
Protease	PC2	1	0.113155	0.0185649	1.88584	0.136
Protease	Ecology	5	0.592997	0.0972909	1.97658	0.0424
Protease	DNA_transposons	1	0.125725	0.0206272	2.09532	0.1152
Protease	LTR_elements	1	0.167674	0.0275097	2.79446	0.0608
Protease	LINEs	1	0.00630204	0.00103395	0.10503	0.9523
Protease	Unclassified	1	0.00518141	0.000850095	0.0863533	0.976
Protease	Residual	83	4.9802	0.817084	NA	NA
Protease	Total	94	6.09509	1	NA	NA
Secret.AA	PC1	1	0.369737	0.0387472	6.21271	0.0035
Secret.AA	PC2	1	0.468598	0.0491075	7.87386	9e-04
Secret.AA	Ecology	5	2.93278	0.307345	9.85592	1e-04
Secret.AA	DNA_transposons	1	0.338806	0.0355057	5.69296	0.0045
Secret.AA	LTR_elements	1	0.0821938	0.00861363	1.3811	0.2369
Secret.AA	LINEs	1	0.0657456	0.00688992	1.10473	0.3192
Secret.AA	Unclassified	1	0.34485	0.0361391	5.79452	0.0035
Secret.AA	Residual	83	4.93958	0.517652	NA	NA
Secret.AA	Total	94	9.5423	1	NA	NA
Secret.CBM	PC1	1	0.395842	0.0365675	5.768	0.0031
Secret.CBM	PC2	1	0.739468	0.0683114	10.7751	2e-04
Secret.CBM	Ecology	5	3.35266	0.309716	9.77065	1e-04
Secret.CBM	DNA_transposons	1	0.136963	0.0126525	1.99575	0.1199
Secret.CBM	LTR_elements	1	0.13885	0.0128269	2.02325	0.1133
Secret.CBM	Unclassified	1	0.365108	0.0337284	5.32016	0.0047
Secret.CBM	Residual	83	5.69606	0.526197	NA	NA
Secret.CBM	Total	93	10.825	1	NA	NA
Secret.GH	PC1	1	0.954107	0.138901	22.4057	1e-04
Secret.GH	PC2	1	0.0926976	0.0134951	2.17686	0.1037
Secret.GH	Ecology	5	1.76862	0.25748	8.30667	1e-04
Secret.GH	DNA_transposons	1	0.233101	0.0339354	5.47401	0.0077
Secret.GH	LTR_elements	1	0.0471355	0.00686209	1.1069	0.3145
Secret.GH	LINEs	1	0.0160895	0.00234235	0.377837	0.7096
Secret.GH	Unclassified	1	0.222805	0.0324365	5.23223	0.007
Secret.GH	Residual	83	3.53441	0.514547	NA	NA
Secret.GH	Total	94	6.86897	1	NA	NA
Secret.PL	PC1	1	1.77554	0.13795	19.2	1e-04
Secret.PL	PC2	1	0.0282682	0.00219629	0.305681	0.8234
Secret.PL	Ecology	5	2.93267	0.227853	6.34255	1e-04
Secret.PL	DNA_transposons	1	0.292465	0.0227229	3.1626	0.0351
Secret.PL	LTR_elements	1	0.0944993	0.00734208	1.02188	0.3489
Secret.PL	Unclassified	1	0.0719367	0.00558909	0.777894	0.4696
Secret.PL	Residual	83	7.67553	0.596347	NA	NA
Secret.PL	Total	93	12.8709	1	NA	NA
Secrete.CE	PC1	1	0.250261	0.0235112	2.93446	0.0459
Secrete.CE	PC2	1	0.200456	0.0188322	2.35048	0.0782
Secrete.CE	Ecology	5	2.33946	0.219785	5.48633	1e-04
Secrete.CE	DNA_transposons	1	0.466791	0.0438535	5.47342	0.0039
Secrete.CE	LTR_elements	1	0.149588	0.0140533	1.75401	0.1529
Secrete.CE	LINEs	1	0.0540537	0.00507817	0.633813	0.5372
Secrete.CE	Unclassified	1	0.105209	0.00988402	1.23364	0.2756
Secrete.CE	Residual	83	7.07851	0.665003	NA	NA
Secrete.CE	Total	94	10.6443	1	NA	NA
SSP	PC1	1	0.04349	0.00695428	0.887658	0.4072
SSP	PC2	1	0.34602	0.0553306	7.0625	0.0028
SSP	Ecology	5	0.712179	0.113881	2.90721	0.0036
SSP	DNA_transposons	1	0.0967815	0.0154759	1.97537	0.1273
SSP	LTR_elements	1	0.293872	0.0469917	5.99811	0.0059
SSP	LINEs	1	0.0268275	0.00428987	0.547567	0.5812
SSP	Unclassified	1	0.668018	0.10682	13.6347	1e-04
SSP	Residual	83	4.0665	0.650257	NA	NA
SSP	Total	94	6.25369	1	NA	NA
Total.GT	PC1	1	0.161309	0.0881738	13.2306	3e-04
Total.GT	PC2	1	0.00364413	0.00199194	0.298893	0.6995
Total.GT	Ecology	5	0.195187	0.106692	3.20185	0.005
Total.GT	DNA_transposons	1	0.0831218	0.0454356	6.81767	0.0056
Total.GT	LTR_elements	1	0.0386745	0.02114	3.17209	0.0601
Total.GT	LINEs	1	0.0666969	0.0364575	5.47049	0.0125
Total.GT	Unclassified	1	0.268865	0.146965	22.0524	1e-04
Total.GT	Residual	83	1.01195	0.553144	NA	NA
Total.GT	Total	94	1.82944	1	NA	NA
