# Supplementary material for: Comparative genomics of Agaricales reveals substrate-driven adaptive radiation and genomic innovations in the subterranean mushroom Agaricus sinodeliciosus
Source: Research Square preprint supplement (doi:10.21203/rs.3.rs-8432113/v1), 2026-02-03
Supplement: Supplementary file 12 [file Table S5 - 122_Count of proteins.xlsx]

## Sheet: CAZyme secreted
Table S5 - The count of secreted CAZymes
JGI_ID	CladeOrder	Ecology	SpeciesName	Phylum	Class	Order	Family	Genus	AA1	AA1_1	AA1_2	AA2	AA3	AA3_1	AA3_2	AA3_3	AA5_1	AA6	AA7	AA8	AA9	AA10	AA11	AA12	AA13	AA14	AA16	CBM1	CBM5	CBM6	CBM8	CBM13	CBM14	CBM18	CBM19	CBM20	CBM21	CBM24	CBM32	CBM35	CBM42	CBM43	CBM48	CBM50	CBM52	CBM63	CBM67	CBM91	CBM92
Phocon1	1	Wood saprotroph	Pholiota conissans	Basidiomycota	Agaricomycetes	Agaricales	Strophariaceae	Pholiota	0	10	0	13	6	1	18	0	5	0	2	1	15	1	0	1	0	2	0	33	3	0	0	10	0	0	0	3	0	0	0	1	3	0	0	18	0	0	2	2	0
Phosp1	2	Wood saprotroph	Pholiota sp.	Basidiomycota	Agaricomycetes	Agaricales	Strophariaceae	Pholiota	0	11	0	12	6	1	22	0	7	0	2	1	16	1	0	1	0	2	0	34	3	0	0	11	0	4	0	3	0	0	0	0	1	0	0	16	0	0	4	2	0
Phohig1	3	Soil saprotroph	Pholiota molesta	Basidiomycota	Agaricomycetes	Agaricales	Strophariaceae	Pholiota	0	14	0	8	4	2	24	0	6	0	3	2	20	1	0	2	0	3	0	27	2	0	0	11	0	2	1	2	0	0	0	1	5	1	0	21	0	0	4	2	0
Hypsu1	4	Wood saprotroph	Hypholoma sublateritium	Basidiomycota	Agaricomycetes	Agaricales	Strophariaceae	Hypholoma	0	9	0	14	8	1	16	0	5	0	1	1	12	2	0	1	0	4	0	26	3	0	0	7	0	0	0	5	0	0	0	1	0	1	0	2	0	0	4	0	0
Phoaln1	5	Soil saprotroph	Pholiota alnicola	Basidiomycota	Agaricomycetes	Agaricales	Strophariaceae	Flammula	0	9	0	9	0	1	22	0	7	0	3	2	13	0	0	1	0	2	0	20	2	0	0	15	0	1	0	1	0	0	0	1	0	1	0	25	0	0	16	0	0
Hebvel2	6	Ectomycorrhiza	Hebeloma brunneifolium	Basidiomycota	Agaricomycetes	Agaricales	Hymenogastraceae	Hebeloma	0	6	0	3	0	0	10	0	5	0	3	0	2	0	0	2	0	2	0	2	1	0	0	9	0	2	0	1	0	0	0	0	1	0	0	19	0	0	0	0	0
Hebcy2	7	Ectomycorrhiza	Hebeloma cylindrosporum	Basidiomycota	Agaricomycetes	Agaricales	Hymenogastraceae	Hebeloma	0	2	0	3	0	0	10	0	3	0	1	0	1	0	0	0	0	2	0	2	3	0	0	7	0	0	0	3	0	0	0	0	0	0	0	0	0	0	0	0	0
Psicub1_1	8	Grass saprotroph	Psilocybe cubensis	Basidiomycota	Agaricomycetes	Agaricales	Strophariaceae	Psilocybe	0	15	0	9	0	1	21	0	3	0	3	1	19	4	0	0	2	2	0	42	1	1	0	4	0	2	0	7	0	0	0	1	2	0	0	26	0	0	8	0	0
Psiser1	9	Litter saprotroph	Psilocybe serbica	Basidiomycota	Agaricomycetes	Agaricales	Strophariaceae	Psilocybe	0	11	0	5	1	1	27	0	5	0	3	1	18	0	0	1	0	3	0	40	1	0	0	3	0	2	0	4	0	0	0	1	0	0	0	17	0	0	4	0	0
Agrped1	10	Grass saprotroph	Agrocybe pediades	Basidiomycota	Agaricomycetes	Agaricales	Strophariaceae	Agrocybe	0	11	0	10	0	1	15	0	7	0	2	1	17	0	0	0	1	3	0	29	3	0	0	5	0	2	0	3	0	0	0	2	3	0	0	5	0	0	8	0	0
Agrpra2	11	Litter saprotroph	Agrocybe praecox	Basidiomycota	Agaricomycetes	Agaricales	Strophariaceae	Agrocybe	0	7	0	11	0	1	12	0	9	0	3	1	20	0	0	0	1	5	0	39	1	0	0	3	0	1	0	5	0	0	0	2	0	0	0	12	0	0	9	0	0
Gymch1	12	Wood saprotroph	Gymnopilus chrysopellus	Basidiomycota	Agaricomycetes	Agaricales	Hymenogastraceae	Gymnopilus	0	4	0	18	0	1	23	0	6	0	2	1	11	0	0	1	0	2	0	28	3	0	0	7	0	0	0	3	0	0	0	2	0	1	0	14	0	0	18	0	1
Gymjun1	13	Wood saprotroph	Gymnopilus junonius	Basidiomycota	Agaricomycetes	Agaricales	Hymenogastraceae	Gymnopilus	0	5	0	14	0	1	7	0	6	0	2	1	11	0	0	1	0	2	0	22	3	0	0	6	0	2	0	1	0	0	0	1	0	0	0	7	0	0	3	0	0
Galma1	14	Wood saprotroph	Galerina marginata	Basidiomycota	Agaricomycetes	Agaricales	Strophariaceae	Galerina	0	6	0	18	0	1	23	0	7	0	1	1	17	1	0	0	0	2	1	54	3	0	0	8	0	2	0	1	0	0	0	2	5	0	0	20	0	0	11	0	0
Crafun1	15	Soil saprotroph	Crassisporium funariophilum	Basidiomycota	Agaricomycetes	Agaricales	Crassisporiaceae	Crassisporium	0	6	0	5	0	1	10	0	5	0	3	1	19	0	0	2	0	4	1	31	4	0	0	5	0	0	0	6	0	0	0	2	0	1	0	4	0	0	1	0	0
Corgl3	16	Ectomycorrhiza	Phlegmacium glaucopus	Basidiomycota	Agaricomycetes	Agaricales	Cortinariaceae	Phlegmacium	0	5	1	9	0	0	10	0	4	0	2	0	2	0	0	0	0	0	0	3	1	0	0	6	0	2	0	3	0	0	0	0	0	0	0	8	0	0	0	0	0
Crevar1	17	Wood saprotroph	Crepidotus variabilis	Basidiomycota	Agaricomycetes	Agaricales	Crepidotaceae	Crepidotus	0	3	0	1	0	2	16	0	4	0	1	4	20	0	0	2	0	3	1	25	4	0	0	8	0	1	0	2	0	0	0	1	0	1	0	5	0	0	1	0	0
Creces1	18	Wood saprotroph	Crepidotus cesatii	Basidiomycota	Agaricomycetes	Agaricales	Crepidotaceae	Crepidotus	0	6	0	0	0	2	8	0	2	0	2	4	21	0	0	2	0	4	2	23	5	0	0	7	0	0	0	3	0	0	0	1	0	1	0	6	0	0	1	1	0
Inolan1	19	Wood saprotroph	Inosperma lanatodiscum	Basidiomycota	Agaricomycetes	Agaricales	Inocybaceae	Inosperma	0	0	2	0	0	0	3	0	8	0	0	0	6	0	0	0	0	8	0	0	1	0	0	25	0	5	0	1	0	0	0	0	0	0	0	17	0	0	0	0	0
Phapla1	20	Wood saprotroph	Phaeosolenia platensis	Basidiomycota	Agaricomycetes	Agaricales	Chromocyphellaceae	Phaeosolenia	0	7	0	0	0	0	7	0	4	0	4	2	25	1	0	5	0	3	1	31	3	0	0	9	0	4	0	2	0	0	0	0	0	0	0	6	0	0	0	2	0
Panpap1	21	Grass saprotroph	Panaeolus papilionaceus	Basidiomycota	Agaricomycetes	Agaricales	Galeropsidaceae	Panaeolus	0	8	0	5	0	1	9	0	5	0	6	2	32	0	0	2	0	3	2	52	3	2	0	8	0	5	0	3	1	2	0	2	1	0	0	11	0	0	1	2	0
Conapa1	22	Grass saprotroph	Conocybe apala	Basidiomycota	Agaricomycetes	Agaricales	Bolbitiaceae	Conocybe	0	6	0	17	0	2	10	0	7	0	0	5	24	0	0	4	0	4	2	56	4	0	0	12	0	0	0	3	0	0	0	1	0	0	0	2	0	0	1	2	0
Bolvit1	23	Grass saprotroph	Bolbitius vitellinus	Basidiomycota	Agaricomycetes	Agaricales	Bolbitiaceae	Bolbitius	0	3	0	0	0	2	7	0	4	0	3	5	25	0	0	4	0	2	2	40	2	0	0	6	0	0	0	4	0	0	0	1	0	1	0	0	0	0	0	1	0
Copci1	24	Litter saprotroph	Coprinopsis cinerea	Basidiomycota	Agaricomycetes	Agaricales	Psathyrellaceae	Coprinopsis	0	17	0	1	0	1	26	0	2	0	0	5	28	0	0	5	0	3	0	30	3	0	0	12	0	0	0	3	1	0	0	1	0	2	0	4	0	0	0	0	0
Copscl1	25	Grass saprotroph	Coprinopsis sclerotiger	Basidiomycota	Agaricomycetes	Agaricales	Psathyrellaceae	Coprinopsis	0	8	0	0	0	1	25	0	2	0	0	3	23	0	0	2	0	2	0	36	3	0	0	10	0	0	0	0	0	0	0	0	0	3	0	2	0	0	0	0	0
Copmar1	26	Grass saprotroph	Coprinopsis marcescibilis	Basidiomycota	Agaricomycetes	Agaricales	Psathyrellaceae	Coprinopsis	0	15	0	7	0	1	26	0	4	0	0	5	36	0	0	6	0	4	0	36	3	0	0	14	0	1	0	1	2	0	0	0	0	4	0	4	0	0	0	0	0
Coppel1	27	Grass saprotroph	Coprinellus pellucidus	Basidiomycota	Agaricomycetes	Agaricales	Psathyrellaceae	Coprinellus	0	16	0	1	0	1	22	0	2	0	1	7	29	0	0	6	1	1	0	46	2	0	0	11	0	2	0	2	0	0	0	1	0	0	0	3	0	0	0	1	0
Copang1	28	Litter saprotroph	Coprinellus angulatus	Basidiomycota	Agaricomycetes	Agaricales	Psathyrellaceae	Tulosesus	0	23	0	2	0	1	35	0	3	0	5	3	57	0	0	3	1	4	0	66	1	0	0	23	0	1	0	2	0	0	0	0	0	1	0	4	0	0	0	3	0
Copmic2	29	Litter saprotroph	Coprinellus micaceus	Basidiomycota	Agaricomycetes	Agaricales	Psathyrellaceae	Coprinellus	0	17	0	3	0	1	31	0	3	0	2	5	38	0	0	6	0	5	0	44	3	0	0	11	0	2	0	1	0	0	0	1	0	1	0	4	0	0	0	0	0
Lacam2	30	Ectomycorrhiza	Laccaria amethystina	Basidiomycota	Agaricomycetes	Agaricales	Hydnangiaceae	Laccaria	0	5	0	1	0	0	8	0	4	0	0	0	2	0	0	0	0	3	0	1	0	0	0	4	0	0	0	1	0	0	0	0	0	0	1	2	0	0	0	0	0
Lacbi2	31	Ectomycorrhiza	Laccaria bicolor	Basidiomycota	Agaricomycetes	Agaricales	Hydnangiaceae	Laccaria	1	9	1	1	0	0	6	0	3	0	0	0	4	0	0	0	0	3	0	1	0	0	0	4	0	0	0	0	0	0	0	0	0	0	1	0	1	0	0	0	0
Cyapal1	32	Wood saprotroph	Cyathus pallidus	Basidiomycota	Agaricomycetes	Agaricales	Nidulariaceae	Cyathus	0	25	3	22	4	3	78	0	8	0	2	3	32	0	0	2	0	6	1	60	1	0	0	47	0	1	0	14	0	0	0	2	0	0	0	28	0	0	22	0	0
Cyaste1	33	Grass saprotroph	Cyathus stercoreus	Basidiomycota	Agaricomycetes	Agaricales	Nidulariaceae	Cyathus	0	30	6	22	2	3	80	0	11	0	1	3	28	0	0	1	0	7	1	76	1	0	0	84	0	1	0	18	0	0	0	3	0	0	0	29	0	0	21	2	0
Cyastr2	34	Wood saprotroph	Cyathus striatus	Basidiomycota	Agaricomycetes	Agaricales	Nidulariaceae	Cyathus	0	9	2	10	1	2	44	0	5	0	1	2	25	0	0	1	0	6	3	29	3	0	0	16	0	1	0	3	0	0	0	2	0	0	0	30	0	0	2	1	0
Mycden1	35	Wood saprotroph	Mycocalia denudata	Basidiomycota	Agaricomycetes	Agaricales	Nidulariaceae	Mycocalia	0	8	1	11	1	0	14	0	3	0	1	0	13	0	0	1	0	2	0	57	3	0	0	24	0	0	0	3	0	0	0	1	0	0	0	3	0	0	2	2	0
Nidsp1	36	Wood saprotroph	Nidula sp.	Basidiomycota	Agaricomycetes	Agaricales	Nidulariaceae	Nidula	0	18	1	7	0	2	41	0	5	0	3	2	31	0	0	1	0	3	0	39	4	0	0	28	0	0	0	5	0	0	0	3	0	0	0	4	0	0	10	1	0
Crula1	37	Wood saprotroph	Crucibulum laeve	Basidiomycota	Agaricomycetes	Agaricales	Nidulariaceae	Crucibulum	0	15	0	13	0	1	40	0	3	0	0	2	31	0	0	1	0	3	1	39	4	0	0	10	0	0	0	6	0	0	0	1	0	1	0	7	0	0	4	0	0
Agabi_varbisH97_2	38	Grass saprotroph	Agaricus bisporus H97	Basidiomycota	Agaricomycetes	Agaricales	Agaricaceae	Agaricus	0	5	0	1	0	0	1	0	1	0	0	0	1	0	0	0	0	1	0	0	0	0	0	0	0	0	0	0	0	0	0	0	0	0	0	0	0	0	0	0	0
Agabi_varbur_1	39	Grass saprotroph	Agaricus bisporus	Basidiomycota	Agaricomycetes	Agaricales	Agaricaceae	Agaricus	0	7	0	2	0	1	16	0	7	0	1	1	11	0	0	1	0	2	1	16	3	0	0	9	0	1	0	1	0	0	0	1	0	0	0	0	0	0	0	0	0
Agasi1	40	Grass saprotroph	Agaricus sinodeliciosus	Basidiomycota	Agaricomycetes	Agaricales	Agaricaceae	Agaricus	0	8	0	2	0	1	17	0	5	0	1	1	10	0	0	0	0	2	1	11	3	0	1	8	0	1	0	1	0	0	0	1	0	0	0	4	0	0	0	1	0
Macfu1	41	Litter saprotroph	Macrolepiota fuliginosa	Basidiomycota	Agaricomycetes	Agaricales	Agaricaceae	Macrolepiota	2	23	0	1	0	3	38	0	4	0	0	3	21	0	0	0	0	2	1	21	6	0	1	18	0	0	0	2	0	0	0	3	0	0	0	14	0	0	0	1	0
Lycper1	42	Litter saprotroph	Lycoperdon perlatum	Basidiomycota	Agaricomycetes	Agaricales	Lycoperdaceae	Lycoperdon	0	32	0	2	0	0	33	0	5	0	0	0	17	0	0	2	0	3	0	24	3	0	0	18	0	1	0	2	0	0	0	2	0	0	0	8	0	0	0	0	0
Amaapr1	43	Ectomycorrhiza	Amanita muscaria	Basidiomycota	Agaricomycetes	Agaricales	Amanitaceae	Amanita	0	16	0	0	0	0	2	0	2	0	5	0	2	0	0	0	0	2	0	0	4	0	0	5	0	1	0	1	0	0	0	0	0	0	0	2	0	0	6	0	0
Amamu1	44	Ectomycorrhiza	Amanita muscaria Koide	Basidiomycota	Agaricomycetes	Agaricales	Amanitaceae	Amanita	0	12	0	0	0	0	2	0	2	0	3	0	2	0	0	0	0	2	0	0	3	0	0	4	0	1	0	1	0	0	0	0	0	1	0	2	0	0	4	0	0
Amarub1	45	Ectomycorrhiza	Amanita rubescens	Basidiomycota	Agaricomycetes	Agaricales	Amanitaceae	Amanita	0	8	0	0	0	0	2	0	5	0	5	0	1	0	0	0	0	4	0	0	0	0	0	3	0	0	0	3	0	0	0	0	0	0	0	6	0	0	21	0	0
Amath1	46	Ectomycorrhiza	Amanita thiersii	Basidiomycota	Agaricomycetes	Agaricales	Amanitaceae	Amanita	0	10	0	0	0	0	3	0	4	0	3	0	12	0	0	0	0	2	1	8	4	0	0	3	0	1	0	2	0	0	0	2	0	1	0	2	0	0	4	0	0
Trima3	47	Ectomycorrhiza	Tricholoma matsutake	Basidiomycota	Agaricomycetes	Agaricales	Tricholomataceae	Tricholoma	0	10	0	0	0	0	6	0	3	0	0	0	2	0	0	0	0	1	0	1	4	0	0	1	0	1	0	1	0	0	0	1	0	1	0	4	2	0	0	0	0
Tripop1	48	Ectomycorrhiza	Tricholoma populinum	Basidiomycota	Agaricomycetes	Agaricales	Tricholomataceae	Tricholoma	0	7	0	0	0	0	8	1	3	0	6	0	3	0	0	0	0	1	0	0	3	0	0	7	0	0	0	2	0	0	0	0	0	0	0	4	2	0	0	0	0
Lepnud1	49	Litter saprotroph	Lepista nuda	Basidiomycota	Agaricomycetes	Agaricales	Clitocybaceae	Collybia	0	19	1	1	2	2	27	0	4	0	4	2	24	0	0	3	0	2	0	33	3	0	0	7	0	6	0	2	0	0	0	2	0	0	0	14	0	0	0	3	1
Lyoat1	50	Soil saprotroph	Lyophyllum atratum	Basidiomycota	Agaricomycetes	Agaricales	Lyophyllaceae	Lyophyllum	0	20	0	2	2	2	23	0	5	0	4	2	28	0	0	5	0	3	1	25	4	0	0	7	0	3	0	2	0	0	0	2	0	0	0	14	0	0	6	2	1
TerJ132_1	51	Grass saprotroph	Termitomyces sp.	Basidiomycota	Agaricomycetes	Agaricales	Lyophyllaceae	Termitomyces	0	9	1	1	2	0	10	0	0	0	2	0	6	0	0	0	0	0	0	15	3	0	0	3	0	0	0	1	0	0	0	2	0	1	0	6	0	0	2	1	2
Hypma1	52	Wood saprotroph	Hypsizygus marmoreus	Basidiomycota	Agaricomycetes	Agaricales	Lyophyllaceae	Hypsizygus	0	15	0	2	1	2	27	0	3	0	1	2	21	0	0	2	0	2	0	28	4	0	0	10	0	3	0	2	0	0	0	3	0	1	0	7	0	0	0	1	1
Cligib1	53	Litter saprotroph	Clitocybe gibba	Basidiomycota	Agaricomycetes	Agaricales		Infundibulicybe	0	11	0	9	1	1	25	0	2	0	1	2	16	0	0	1	0	2	1	27	4	0	0	4	0	1	0	2	0	0	0	2	0	1	0	27	0	0	1	1	0
Plucer1	54	Wood saprotroph	Pluteus cervinus	Basidiomycota	Agaricomycetes	Agaricales	Pluteaceae	Pluteus	0	9	0	12	0	1	5	0	3	0	0	2	23	0	0	6	0	3	1	24	5	0	1	9	0	3	0	3	0	0	0	1	0	0	0	7	0	0	2	0	0
Volvo1	55	Grass saprotroph	Volvariella volvacea	Basidiomycota	Agaricomycetes	Agaricales	Pluteaceae	Volvariella	0	8	0	6	0	1	13	0	1	0	0	1	28	0	0	3	0	2	3	46	2	0	0	4	0	1	0	1	0	0	0	1	0	0	0	5	0	0	0	0	0
Radcon1	56	Wood saprotroph	Radulomyces confluens	Basidiomycota	Agaricomycetes	Agaricales	Radulomycetaceae	Radulomyces	0	21	1	9	0	1	10	0	6	0	2	1	12	0	0	1	0	2	1	22	5	0	0	2	0	1	0	3	0	0	0	3	0	0	0	15	0	0	9	2	0
Aphpse1	57	Wood saprotroph	Aphanobasidium pseudotsugae	Basidiomycota	Agaricomycetes	Agaricales	Radulomycetaceae	Aphanobasidium	0	10	1	7	0	1	4	0	5	0	1	1	5	0	0	1	0	1	0	18	4	0	0	0	0	3	0	2	0	0	0	1	0	0	0	8	0	0	6	0	0
Ptegra1	58	Grass saprotroph	Pterula gracilis	Basidiomycota	Agaricomycetes	Agaricales	Pterulaceae	Pterula	1	9	0	1	1	1	9	2	5	0	0	1	27	0	0	0	0	1	1	23	6	0	0	12	0	0	0	4	0	0	0	2	0	0	0	11	0	0	1	0	0
Hygcoc2	59	Grass saprotroph	Hygrocybe coccinea	Basidiomycota	Agaricomycetes	Agaricales	Hygrophoraceae	Hygrocybe	0	2	0	0	1	0	3	0	5	0	0	0	1	0	0	0	0	0	0	0	0	0	0	0	0	1	0	2	0	0	0	0	0	0	0	13	0	0	0	0	0
Crison1	60	Pathogen	Cristinia sonorae	Basidiomycota	Agaricomycetes	Agaricales	Stephanosporaceae	Cristinia	0	11	0	19	0	1	6	0	3	0	0	1	15	0	0	0	0	3	0	26	4	0	0	0	0	1	0	2	0	0	0	1	0	0	0	4	0	0	0	1	0
PleosPC9_1	61	Wood saprotroph	Pleurotus ostreatus	Basidiomycota	Agaricomycetes	Agaricales	Pleurotaceae	Pleurotus	0	7	0	8	0	0	20	0	6	0	2	0	17	0	0	0	0	0	0	29	0	0	0	8	0	1	0	2	0	0	0	1	0	0	0	0	0	0	4	1	0
Pleery1	62	Wood saprotroph	Pleurotus eryngii	Basidiomycota	Agaricomycetes	Agaricales	Pleurotaceae	Pleurotus	0	10	1	8	1	0	20	0	9	0	0	0	27	0	0	1	0	1	1	40	4	0	0	7	0	1	0	1	0	0	0	2	0	0	0	6	0	0	2	0	0
Armga1	63	Wood saprotroph	Armillaria gallica	Basidiomycota	Agaricomycetes	Agaricales	Physalacriaceae	Armillaria	1	21	0	8	0	3	42	0	3	0	0	1	17	0	0	0	0	3	1	13	4	0	0	1	0	0	1	5	0	0	0	1	0	0	0	14	0	0	26	0	0
Armcep1	64	Wood saprotroph	Armillaria cepistipes	Basidiomycota	Agaricomycetes	Agaricales	Physalacriaceae	Armillaria	1	20	1	8	0	3	40	0	4	0	2	1	17	0	0	0	0	3	0	9	3	0	0	1	0	0	0	3	0	0	0	1	0	0	0	13	0	0	16	0	0
Armnab1	65	Wood saprotroph	Armillaria nabsnona	Basidiomycota	Agaricomycetes	Agaricales	Physalacriaceae	Armillaria	1	18	0	8	0	2	44	0	4	0	3	2	18	0	0	0	0	3	2	14	4	0	0	1	0	0	0	4	0	0	0	2	0	0	0	13	0	0	24	1	0
Armost1	66	Pathogen	Armillaria ostoyae	Basidiomycota	Agaricomycetes	Agaricales	Physalacriaceae	Armillaria	1	20	0	7	0	3	37	0	4	0	3	1	17	0	0	0	0	4	2	10	4	0	0	1	0	0	1	4	0	0	0	2	0	0	0	17	0	0	13	1	0
Armosto1	67	Wood saprotroph	Armillaria solidipes	Basidiomycota	Agaricomycetes	Agaricales	Physalacriaceae	Armillaria	1	20	0	6	0	3	31	0	4	0	3	1	17	0	0	0	0	4	1	8	4	0	0	1	0	0	0	3	0	0	0	1	0	0	0	16	0	0	18	1	0
Armbor1	68	Wood saprotroph	Armillaria borealis	Basidiomycota	Agaricomycetes	Agaricales	Physalacriaceae	Armillaria	1	19	0	8	0	2	35	0	4	0	3	1	20	0	0	0	0	3	2	12	3	0	0	1	0	0	0	4	0	0	0	1	0	0	0	17	0	0	14	1	0
Armfum1	69	Wood saprotroph	Armillaria fumosa	Basidiomycota	Agaricomycetes	Agaricales	Physalacriaceae	Armillaria	1	19	0	7	0	2	34	0	4	0	4	1	17	0	0	0	0	3	2	13	4	0	0	1	0	0	0	3	0	0	0	1	0	0	0	13	0	0	17	1	0
Armlut1	70	Litter saprotroph	Armillaria luteobubalina	Basidiomycota	Agaricomycetes	Agaricales	Physalacriaceae	Armillaria	0	21	0	6	0	4	34	0	3	0	4	2	22	0	0	0	0	4	2	11	4	0	0	1	0	0	0	4	0	0	0	2	0	0	0	23	0	0	16	1	0
Armnov1	71	Pathogen	Armillaria novae-zelandiae	Basidiomycota	Agaricomycetes	Agaricales	Physalacriaceae	Armillaria	1	21	0	7	0	4	34	0	4	0	4	2	19	0	0	0	0	4	2	12	4	0	0	1	0	0	0	4	0	0	0	2	0	0	0	21	0	0	16	1	0
Armme1_1	72	Pathogen	Armillaria mellea	Basidiomycota	Agaricomycetes	Agaricales	Physalacriaceae	Armillaria	0	12	1	7	0	2	27	0	3	0	2	0	16	0	0	0	0	3	0	9	3	0	0	1	0	0	0	3	0	0	0	1	0	0	0	12	0	0	0	0	0
Armect1	73	Litter saprotroph	Armillaria ectypa	Basidiomycota	Agaricomycetes	Agaricales	Physalacriaceae	Desarmillaria	1	22	0	5	0	1	24	0	4	0	3	2	14	0	0	0	0	3	1	8	4	0	0	1	0	0	0	5	0	0	0	2	0	0	0	2	0	0	6	1	0
Armtab1	74	Wood saprotroph	Armillaria tabescens	Basidiomycota	Agaricomycetes	Agaricales	Physalacriaceae	Desarmillaria	1	17	0	7	0	2	46	0	5	0	3	1	19	0	0	0	0	3	2	9	4	0	0	2	0	0	0	4	0	0	0	2	0	0	0	18	0	0	12	1	0
Guyne1	75	Wood saprotroph	Guyanagaster necrorhizus	Basidiomycota	Agaricomycetes	Agaricales	Physalacriaceae	Guyanagaster	1	15	0	3	0	1	20	0	1	0	3	1	15	0	0	0	0	2	2	8	3	0	0	1	0	0	0	3	0	0	0	1	0	0	0	6	0	0	6	1	0
Hymrad1	76	Wood saprotroph	Hymenopellis radicata	Basidiomycota	Agaricomycetes	Agaricales	Physalacriaceae	Hymenopellis	1	10	1	8	2	2	25	0	6	0	1	1	20	0	0	0	0	3	3	21	4	0	0	1	0	3	0	2	0	0	0	3	0	0	0	13	0	0	3	2	0
Oudmuc1	77	Wood saprotroph	Oudemansiella mucida	Basidiomycota	Agaricomycetes	Agaricales	Physalacriaceae	Mucidula	0	11	1	8	1	1	20	0	11	0	0	1	15	0	0	0	0	4	2	14	3	0	0	0	0	1	0	3	0	0	0	2	0	1	0	4	0	0	2	1	0
Cylto1	78	Wood saprotroph	Cylindrobasidium torrendii	Basidiomycota	Agaricomycetes	Agaricales	Physalacriaceae	Cylindrobasidium	3	2	0	0	1	2	6	1	3	0	2	3	23	0	0	0	0	3	3	7	8	0	0	5	0	0	0	3	0	0	0	2	0	0	0	4	0	0	1	3	0
Rhobu1	79	Litter saprotroph	Rhodocollybia butyracea	Basidiomycota	Agaricomycetes	Agaricales	Omphalotaceae	Rhodocollybia	1	19	0	2	0	0	20	0	4	0	3	0	4	0	0	0	0	5	0	18	4	0	0	1	0	0	0	3	0	0	1	3	0	0	0	14	0	0	4	1	0
Lenlat1	80	Wood saprotroph	Lentinula lateritia	Basidiomycota	Agaricomycetes	Agaricales	Omphalotaceae	Lentinula	0	11	0	4	1	1	12	0	3	0	2	1	12	0	0	0	0	3	0	22	4	0	0	1	0	1	0	5	0	0	0	3	0	1	0	6	0	0	4	0	0
Gymlu1	81	Wood saprotroph	Gymnopus luxurians	Basidiomycota	Agaricomycetes	Agaricales	Omphalotaceae	Collybiopsis	1	15	1	4	0	1	24	0	7	0	3	1	10	0	0	0	0	3	0	29	5	0	0	1	0	1	0	4	0	0	0	3	0	1	0	10	10	0	10	0	0
Gyman1	82	Litter saprotroph	Gymnopus androsaceus	Basidiomycota	Agaricomycetes	Agaricales	Omphalotaceae	Gymnopus	1	23	0	9	0	0	23	0	11	0	0	1	5	0	0	0	0	3	0	29	4	0	0	1	0	0	0	3	0	0	0	2	0	1	0	9	2	0	11	0	0
Gymear1	83	Soil saprotroph	Gymnopus earleae	Basidiomycota	Agaricomycetes	Agaricales	Omphalotaceae	Gymnopus	0	12	3	8	0	0	11	0	4	0	7	0	5	0	0	0	0	2	0	31	6	0	0	1	0	1	0	6	0	0	0	2	4	1	0	21	1	0	6	1	0
Ompol1	84	Wood saprotroph	Omphalotus olearius	Basidiomycota	Agaricomycetes	Agaricales	Omphalotaceae	Omphalotus	0	3	0	4	1	1	9	0	7	0	0	2	9	0	0	0	0	3	1	12	1	0	0	1	0	0	0	1	0	0	0	1	0	0	0	2	0	0	2	1	0
Denbi1	85	Wood saprotroph	Dendrothele bispora	Basidiomycota	Agaricomycetes	Agaricales		Dendrothele	0	28	1	8	0	3	38	1	29	0	1	1	17	0	0	0	0	6	1	22	1	0	0	1	0	0	0	2	0	0	0	2	0	0	0	15	0	0	12	4	0
Marfi1	86	Litter saprotroph	Marasmius fiardii	Basidiomycota	Agaricomycetes	Agaricales	Marasmiaceae	Marasmius	0	16	0	0	0	1	38	0	3	0	0	1	17	0	0	2	0	2	3	10	3	0	1	31	0	0	0	3	0	0	0	3	0	1	0	3	0	0	0	0	0
MroMCA2997_1	87	Pathogen	Moniliophthora roreri	Basidiomycota	Agaricomycetes	Agaricales	Marasmiaceae	Moniliophthora	0	24	0	2	2	2	37	0	2	0	8	3	24	0	0	1	0	1	3	18	5	0	1	2	0	3	0	1	0	0	0	3	0	0	0	7	0	0	0	3	0
Cysmur1	88	Pathogen	Cystostereum murrayi	Basidiomycota	Agaricomycetes	Agaricales	Cystostereaceae	Cystostereum	1	13	0	2	0	1	26	0	3	0	3	2	18	0	0	1	0	5	0	1	2	0	0	2	0	0	0	1	0	0	0	3	0	0	0	4	0	0	0	1	1
Mycflo1	89	Litter saprotroph	Mycena floridula	Basidiomycota	Agaricomycetes	Agaricales	Mycenaceae	Mycena	0	19	0	13	4	0	24	0	25	0	10	0	26	0	0	1	0	2	3	32	3	0	0	6	0	3	0	3	0	0	0	2	0	0	1	8	2	0	6	0	0
Schco_LoeD_1	90	Wood saprotroph	Schizophyllum commune	Basidiomycota	Agaricomycetes	Agaricales	Schizophyllaceae	Schizophyllum	1	2	0	0	0	1	7	0	1	0	1	3	20	0	4	0	0	3	2	5	2	0	0	13	0	1	0	1	0	0	0	1	0	0	0	2	0	0	0	2	1
Schrad1	91	Wood saprotroph	Schizophyllum radiatum	Basidiomycota	Agaricomycetes	Agaricales	Schizophyllaceae	Schizophyllum	0	3	0	0	1	1	10	0	2	0	4	4	23	0	5	0	0	3	3	4	2	0	0	14	0	0	0	1	0	0	0	2	0	0	0	2	0	0	0	2	2
Schfas1	92	Litter saprotroph	Schizophyllum fasciatum	Basidiomycota	Agaricomycetes	Agaricales	Schizophyllaceae	Schizophyllum	2	2	0	0	0	1	12	0	1	0	3	3	16	0	1	0	0	1	1	4	2	0	0	16	0	0	0	1	0	0	0	2	0	0	0	0	0	0	0	0	1
Auramp1	93	Wood saprotroph	Auriculariopsis ampla	Basidiomycota	Agaricomycetes	Agaricales	Schizophyllaceae	Auriculariopsis	0	4	0	0	1	1	13	0	1	0	2	3	18	0	5	0	0	5	1	3	4	0	0	13	0	1	0	0	0	0	0	1	0	0	0	2	0	0	0	0	0
Fishe1	94	Wood saprotroph	Fistulina hepatica	Basidiomycota	Agaricomycetes	Agaricales	Fistulinaceae	Fistulina	1	3	0	0	0	2	6	0	1	0	0	3	3	0	0	0	0	5	0	0	1	0	0	1	0	0	0	3	0	0	0	2	0	0	0	0	0	0	0	0	0
Niavib1	95	Wood saprotroph	Nia vibrissa	Basidiomycota	Agaricomycetes	Agaricales	Cyphellopsidaceae	Nia	0	8	0	0	0	1	15	0	3	0	0	4	15	0	0	2	0	2	0	16	4	0	0	6	0	1	0	1	0	0	0	1	0	1	0	0	0	0	0	2	1
Denmi1	96	Wood saprotroph	Dendrothele microspora	Basidiomycota	Agaricomycetes	Agaricales		Dendrothele	0	12	0	8	1	1	17	0	8	1	2	1	20	0	0	1	0	4	3	7	3	0	0	14	0	0	0	4	0	0	0	4	1	0	0	4	0	1	0	2	1
Mychae1	97	Wood saprotroph	Mycena haematopus	Basidiomycota	Agaricomycetes	Agaricales	Mycenaceae	Mycena	0	9	0	0	2	1	32	0	8	0	5	1	10	2	0	0	0	2	0	31	4	0	0	26	0	1	0	3	0	0	0	2	4	0	0	9	2	0	19	0	0
Mycsan1	98	Litter saprotroph	Mycena sanguinolenta	Basidiomycota	Agaricomycetes	Agaricales	Mycenaceae	Mycena	3	25	0	10	8	2	62	0	7	0	5	1	14	5	0	1	0	2	0	44	6	0	0	46	0	4	0	4	0	0	0	4	6	0	0	55	15	0	29	0	0
Mycgal1	99	Litter saprotroph	Mycena galopus	Basidiomycota	Agaricomycetes	Agaricales	Mycenaceae	Mycena	3	24	2	17	6	2	68	0	15	0	2	1	11	2	0	1	0	2	1	44	5	0	0	28	1	6	0	4	2	0	0	5	5	1	0	61	18	0	20	0	0
Mycalb1	100	Grass saprotroph	Mycena albidolilacea	Basidiomycota	Agaricomycetes	Agaricales	Mycenaceae	Mycena	1	23	0	17	1	2	69	0	16	0	6	1	14	0	0	1	0	4	1	43	5	0	0	32	0	9	0	5	0	0	0	6	8	2	0	43	7	0	23	0	0
Mycoli1	101	Grass saprotroph	Mycena olivaceomarginata	Basidiomycota	Agaricomycetes	Agaricales	Mycenaceae	Mycena	0	42	0	25	4	4	115	0	28	0	4	2	29	0	0	1	0	5	3	79	5	0	0	54	0	9	0	6	1	0	0	8	10	2	0	39	14	0	44	0	0
Favcal1_2	102	Wood saprotroph	Favolaschia claudopus	Basidiomycota	Agaricomycetes	Agaricales	Mycenaceae	Favolaschia	0	20	0	15	17	2	49	0	11	0	4	1	14	0	0	3	0	3	1	48	3	0	0	38	0	15	0	16	0	0	0	8	5	1	0	42	2	0	15	3	1
Mycvit1	103	Litter saprotroph	Mycena vitilis	Basidiomycota	Agaricomycetes	Agaricales	Mycenaceae	Mycena	0	19	0	16	3	2	26	0	12	0	7	1	16	0	0	1	0	5	2	27	5	0	0	10	0	3	0	5	2	0	0	3	8	1	0	20	2	0	14	0	0
Mycpol1	104	Wood saprotroph	Mycena polygramma	Basidiomycota	Agaricomycetes	Agaricales	Mycenaceae	Mycena	0	26	0	33	5	2	50	0	10	0	6	1	27	0	0	1	0	4	2	43	12	0	0	16	0	7	0	4	1	0	0	6	7	1	0	16	4	0	16	0	0
Mycrub1	105	Litter saprotroph	Mycena capillaripes	Basidiomycota	Agaricomycetes	Agaricales	Mycenaceae	Mycena	0	30	0	34	5	2	52	0	13	0	11	2	14	2	0	1	0	3	2	37	5	0	0	32	0	9	0	6	2	0	0	5	5	1	0	41	8	0	25	0	0
Myclep1	106	Litter saprotroph	Mycena leptocephala	Basidiomycota	Agaricomycetes	Agaricales	Mycenaceae	Mycena	0	33	9	46	8	1	94	2	15	0	4	1	26	7	0	1	0	4	2	66	6	0	0	86	1	9	2	5	2	0	0	6	11	1	0	30	12	0	36	0	0
Mycmet1	107	Litter saprotroph	Mycena metata	Basidiomycota	Agaricomycetes	Agaricales	Mycenaceae	Mycena	0	35	1	16	2	3	45	6	10	0	7	1	11	0	0	1	0	3	1	51	4	0	0	38	0	1	2	3	0	0	0	4	6	2	0	25	9	0	34	0	0
Mycale1	108	Litter saprotroph	Mycena alexandri	Basidiomycota	Agaricomycetes	Agaricales	Mycenaceae	Mycena	1	28	2	15	2	2	36	4	7	0	4	1	12	0	0	1	0	2	1	39	5	0	0	24	0	1	1	3	0	0	0	6	4	3	0	11	5	0	10	0	0
Mycfil1	109	Litter saprotroph	Mycena filopes	Basidiomycota	Agaricomycetes	Agaricales	Mycenaceae	Mycena	0	37	0	6	3	3	47	2	8	0	6	1	18	0	0	2	0	3	3	33	3	0	0	10	0	5	2	2	1	0	0	6	5	2	0	44	2	0	12	0	0
Mycbel1	110	Grass saprotroph	Mycena belliae	Basidiomycota	Agaricomycetes	Agaricales	Mycenaceae	Mycena	0	13	0	11	1	1	7	0	3	1	3	1	12	0	0	1	0	2	1	29	4	0	0	6	0	1	0	9	0	0	0	3	5	2	0	1	4	0	12	0	0
Myclat1	111	Grass saprotroph	Mycena latifolia	Basidiomycota	Agaricomycetes	Agaricales	Mycenaceae	Mycena	0	40	3	23	2	1	66	0	9	0	6	1	16	0	0	2	0	4	2	43	5	0	0	29	0	4	0	5	1	0	0	6	4	2	0	20	14	0	30	0	0
Mycros1	112	Litter saprotroph	Mycena rosella	Basidiomycota	Agaricomycetes	Agaricales	Mycenaceae	Mycena	0	19	0	8	3	2	66	1	8	0	6	1	15	0	0	3	0	4	1	28	4	0	0	19	0	2	0	5	0	0	0	5	3	3	0	14	4	0	8	0	0
Mycvul1	113	Litter saprotroph	Mycena vulgaris	Basidiomycota	Agaricomycetes	Agaricales	Mycenaceae	Mycena	0	38	1	22	4	2	83	0	19	0	6	2	15	0	0	2	0	6	1	47	5	0	0	44	1	5	1	5	1	0	0	6	6	1	0	53	8	0	28	0	0
Mycepi1	114	Litter saprotroph	Mycena epipterygia	Basidiomycota	Agaricomycetes	Agaricales	Mycenaceae	Mycena	0	36	1	35	9	2	47	0	11	0	6	1	14	2	0	1	0	4	1	38	3	0	0	27	0	5	0	3	1	0	0	5	4	1	0	15	13	0	11	0	0
Myccro1	115	Litter saprotroph	Mycena crocata	Basidiomycota	Agaricomycetes	Agaricales	Mycenaceae	Mycena	0	28	2	10	4	2	28	0	9	0	5	1	14	0	0	1	0	2	2	26	4	0	0	13	0	2	0	5	1	0	0	5	5	2	0	11	2	0	8	0	0
Mycgale1	116	Wood saprotroph	Mycena galericulata	Basidiomycota	Agaricomycetes	Agaricales	Mycenaceae	Mycena	0	44	3	24	2	2	62	0	13	0	11	1	13	0	0	2	0	6	0	41	5	0	0	39	0	5	0	11	0	0	0	3	10	2	0	11	3	0	33	0	0
Mycmac1	117	Wood saprotroph	Mycena maculata	Basidiomycota	Agaricomycetes	Agaricales	Mycenaceae	Mycena	0	13	1	10	1	2	25	0	9	0	5	1	8	0	0	1	0	3	0	26	5	0	0	29	0	5	0	4	0	0	0	2	4	1	0	12	2	0	9	0	0
Mycreb1	118	Litter saprotroph	Mycena rebaudengoi	Basidiomycota	Agaricomycetes	Agaricales	Mycenaceae	Mycena	0	40	0	12	11	2	91	0	36	0	12	2	15	3	0	2	0	2	5	50	6	0	0	55	0	11	6	6	1	0	0	8	9	2	0	33	3	0	22	0	0
Myc59_1	119	Litter saprotroph	Mycena sp.	Basidiomycota	Agaricomycetes	Agaricales	Mycenaceae	Mycena	0	18	3	10	6	4	34	0	5	0	7	2	12	3	0	1	0	5	5	37	3	0	0	20	0	2	0	5	1	0	0	5	5	1	0	26	2	0	14	0	0
Mycami1	120	Wood saprotroph	Mycena amicta	Basidiomycota	Agaricomycetes	Agaricales	Mycenaceae	Mycena	0	20	0	12	3	1	20	0	10	0	5	0	13	0	0	0	0	3	0	24	5	0	0	14	0	1	0	9	0	0	0	4	7	3	0	20	10	0	7	0	0
Mycpur1	121	Grass saprotroph	Mycena pura	Basidiomycota	Agaricomycetes	Agaricales	Mycenaceae	Mycena	0	13	1	11	1	1	31	0	19	0	4	1	6	0	0	1	0	1	1	26	1	0	0	19	4	8	0	4	0	0	0	4	3	1	0	25	6	0	14	0	0
Rorror1	122	Litter saprotroph	Roridomyces roridus	Basidiomycota	Agaricomycetes	Agaricales	Mycenaceae	Roridomyces	0	30	0	17	0	2	33	0	33	0	4	1	16	2	0	1	0	2	1	43	6	0	0	5	0	6	1	5	0	0	0	2	5	2	0	51	4	0	19	0	0
[truncated: 149 more columns]

## Sheet: CAZyme total
Table S5 - The count of total CAZymes
JGI_ID	CladeOrder	Ecology	SpeciesName	Phylum	Class	Order	Family	Genus	AA1	AA1_1	AA1_2	AA2	AA3	AA3_1	AA3_2	AA3_3	AA3_4	AA5_1	AA6	AA7	AA8	AA9	AA10	AA11	AA12	AA13	AA14	AA16	CBM1	CBM5	CBM6	CBM8	CBM12	CBM13	CBM14	CBM18	CBM19	CBM20	CBM21	CBM24	CBM32	CBM35	CBM42	CBM43	CBM48	CBM50	CBM52	CBM63	CBM67
Phocon1	1	Wood saprotroph	Pholiota conissans	Basidiomycota	Agaricomycetes	Agaricales	Strophariaceae	Pholiota	0	10	1	16	8	1	33	5	1	9	3	2	1	18	1	0	1	0	3	0	35	4	0	0	1	11	0	1	0	3	2	0	0	1	3	1	2	20	0	0	6
Phosp1	2	Wood saprotroph	Pholiota sp.	Basidiomycota	Agaricomycetes	Agaricales	Strophariaceae	Pholiota	0	14	1	15	8	1	34	7	1	10	2	2	1	20	1	0	1	0	4	0	38	3	0	0	1	13	0	5	0	4	2	0	0	1	3	1	3	18	0	0	5
Phohig1	3	Soil saprotroph	Pholiota molesta	Basidiomycota	Agaricomycetes	Agaricales	Strophariaceae	Pholiota	0	16	1	15	6	2	36	7	0	10	3	4	2	20	1	0	2	0	3	0	27	4	0	0	0	13	0	4	1	3	1	0	0	2	5	1	2	23	0	0	4
Hypsu1	4	Wood saprotroph	Hypholoma sublateritium	Basidiomycota	Agaricomycetes	Agaricales	Strophariaceae	Hypholoma	0	11	2	15	14	1	28	4	0	10	5	2	1	14	2	0	1	0	4	0	29	3	0	0	0	12	0	1	0	5	2	0	0	2	0	1	2	3	0	0	7
Phoaln1	5	Soil saprotroph	Pholiota alnicola	Basidiomycota	Agaricomycetes	Agaricales	Strophariaceae	Flammula	0	11	1	15	0	1	38	6	1	13	3	3	2	13	0	0	1	0	3	0	25	3	0	0	1	23	0	2	0	3	2	0	0	2	0	1	1	28	0	0	20
Hebvel2	6	Ectomycorrhiza	Hebeloma brunneifolium	Basidiomycota	Agaricomycetes	Agaricales	Hymenogastraceae	Hebeloma	0	6	2	4	0	0	22	7	1	11	3	4	0	3	0	0	2	0	3	0	2	3	0	0	0	21	0	3	0	3	2	0	0	0	1	1	2	24	0	0	0
Hebcy2	7	Ectomycorrhiza	Hebeloma cylindrosporum	Basidiomycota	Agaricomycetes	Agaricales	Hymenogastraceae	Hebeloma	1	2	1	4	0	0	16	1	0	7	2	3	0	3	0	0	0	0	3	0	2	3	0	0	0	11	0	1	0	4	1	0	0	0	0	1	2	7	0	0	1
Psicub1_1	8	Grass saprotroph	Psilocybe cubensis	Basidiomycota	Agaricomycetes	Agaricales	Strophariaceae	Psilocybe	0	19	1	10	0	1	33	7	0	11	3	4	1	20	5	0	0	2	3	0	45	3	1	0	0	16	0	3	0	7	2	0	0	2	2	1	2	32	0	0	9
Psiser1	9	Litter saprotroph	Psilocybe serbica	Basidiomycota	Agaricomycetes	Agaricales	Strophariaceae	Psilocybe	0	16	1	7	1	1	52	7	0	10	3	4	1	19	0	0	1	1	3	0	41	3	0	0	0	14	0	3	0	5	2	0	0	2	0	1	2	21	0	0	4
Agrped1	10	Grass saprotroph	Agrocybe pediades	Basidiomycota	Agaricomycetes	Agaricales	Strophariaceae	Agrocybe	0	12	1	13	2	1	29	5	0	21	3	2	1	20	0	0	0	2	4	0	35	3	0	0	0	12	0	3	0	5	1	0	0	2	4	1	3	15	0	0	18
Agrpra2	11	Litter saprotroph	Agrocybe praecox	Basidiomycota	Agaricomycetes	Agaricales	Strophariaceae	Agrocybe	0	9	1	15	0	1	26	4	0	16	2	4	1	21	0	0	0	1	5	0	41	4	0	0	0	12	0	2	0	5	1	0	0	2	0	1	2	14	0	0	9
Gymch1	12	Wood saprotroph	Gymnopilus chrysopellus	Basidiomycota	Agaricomycetes	Agaricales	Hymenogastraceae	Gymnopilus	0	5	1	21	0	1	40	5	1	11	3	3	1	11	0	0	1	0	3	0	31	3	0	0	1	14	0	2	0	3	2	0	0	2	0	1	2	18	0	0	21
Gymjun1	13	Wood saprotroph	Gymnopilus junonius	Basidiomycota	Agaricomycetes	Agaricales	Hymenogastraceae	Gymnopilus	0	5	1	16	1	1	27	4	0	10	4	3	1	14	0	0	1	0	2	0	26	3	0	0	1	18	0	3	0	2	2	0	0	2	0	1	2	10	0	0	13
Galma1	14	Wood saprotroph	Galerina marginata	Basidiomycota	Agaricomycetes	Agaricales	Strophariaceae	Galerina	0	8	1	24	0	1	32	6	0	16	3	8	1	19	1	0	1	0	3	1	54	3	0	0	1	12	0	3	0	3	2	0	0	2	7	1	2	19	0	0	17
Crafun1	15	Soil saprotroph	Crassisporium funariophilum	Basidiomycota	Agaricomycetes	Agaricales	Crassisporiaceae	Crassisporium	0	8	1	6	0	1	17	3	0	7	3	3	1	21	0	0	2	0	5	1	31	4	0	0	1	9	0	1	0	6	2	0	0	3	0	2	2	6	0	0	5
Corgl3	16	Ectomycorrhiza	Phlegmacium glaucopus	Basidiomycota	Agaricomycetes	Agaricales	Cortinariaceae	Phlegmacium	0	5	3	13	0	0	26	5	1	6	4	4	0	2	0	0	0	0	2	0	3	2	0	0	1	10	0	3	0	4	2	0	0	0	0	1	2	12	0	0	0
Crevar1	17	Wood saprotroph	Crepidotus variabilis	Basidiomycota	Agaricomycetes	Agaricales	Crepidotaceae	Crepidotus	0	6	1	2	0	2	24	2	0	7	2	1	4	27	0	0	2	0	4	2	28	4	0	0	2	17	0	2	0	2	2	0	0	1	0	1	2	11	0	0	1
Creces1	18	Wood saprotroph	Crepidotus cesatii	Basidiomycota	Agaricomycetes	Agaricales	Crepidotaceae	Crepidotus	0	6	1	2	0	2	18	2	0	6	2	2	4	26	0	0	2	0	4	3	24	6	0	0	2	16	0	1	0	4	2	0	0	1	0	1	2	8	0	0	1
Inolan1	19	Wood saprotroph	Inosperma lanatodiscum	Basidiomycota	Agaricomycetes	Agaricales	Inocybaceae	Inosperma	0	0	4	2	0	0	11	3	0	15	3	2	0	7	0	0	0	0	10	0	0	2	0	0	1	46	0	6	0	1	3	0	0	0	0	1	1	26	0	0	0
Phapla1	20	Wood saprotroph	Phaeosolenia platensis	Basidiomycota	Agaricomycetes	Agaricales	Chromocyphellaceae	Phaeosolenia	0	9	2	1	0	1	17	2	0	10	3	6	3	30	1	0	5	0	6	1	38	4	0	0	0	11	0	5	0	2	3	0	0	0	0	1	3	12	0	0	1
Panpap1	21	Grass saprotroph	Panaeolus papilionaceus	Basidiomycota	Agaricomycetes	Agaricales	Galeropsidaceae	Panaeolus	0	10	1	9	0	1	15	10	0	10	3	6	3	40	0	0	3	0	4	2	68	5	2	0	1	14	0	7	0	5	2	2	0	2	1	3	2	21	0	0	10
Conapa1	22	Grass saprotroph	Conocybe apala	Basidiomycota	Agaricomycetes	Agaricales	Bolbitiaceae	Conocybe	0	7	2	24	0	2	18	5	1	14	5	2	6	27	0	0	5	0	6	3	61	4	0	0	2	22	0	1	0	4	2	0	0	1	0	2	2	4	0	0	4
Bolvit1	23	Grass saprotroph	Bolbitius vitellinus	Basidiomycota	Agaricomycetes	Agaricales	Bolbitiaceae	Bolbitius	0	4	1	0	0	2	14	7	2	10	3	3	8	26	0	0	6	0	3	2	48	3	0	0	1	10	0	1	0	6	2	0	0	1	0	1	3	4	0	0	0
Copci1	24	Litter saprotroph	Coprinopsis cinerea	Basidiomycota	Agaricomycetes	Agaricales	Psathyrellaceae	Coprinopsis	0	17	0	2	0	1	35	2	0	6	3	0	6	34	0	0	7	0	5	0	39	3	0	0	1	28	0	1	0	3	5	0	0	1	0	2	3	8	0	0	0
Copscl1	25	Grass saprotroph	Coprinopsis sclerotiger	Basidiomycota	Agaricomycetes	Agaricales	Psathyrellaceae	Coprinopsis	0	10	0	1	1	1	33	2	0	6	3	0	5	31	0	0	4	0	3	0	41	3	0	0	1	16	0	1	0	1	4	0	0	0	0	3	2	6	0	0	0
Copmar1	26	Grass saprotroph	Coprinopsis marcescibilis	Basidiomycota	Agaricomycetes	Agaricales	Psathyrellaceae	Coprinopsis	0	20	0	8	0	1	32	1	0	7	3	0	6	42	0	0	8	0	6	0	51	3	0	0	1	34	0	1	0	1	4	0	0	1	0	5	3	6	0	0	0
Coppel1	27	Grass saprotroph	Coprinellus pellucidus	Basidiomycota	Agaricomycetes	Agaricales	Psathyrellaceae	Coprinellus	0	19	1	2	0	1	31	1	0	8	3	1	7	38	0	0	6	1	4	0	49	3	0	0	1	20	0	2	0	2	3	0	0	1	0	1	3	7	0	0	1
Copang1	28	Litter saprotroph	Coprinellus angulatus	Basidiomycota	Agaricomycetes	Agaricales	Psathyrellaceae	Tulosesus	0	25	2	3	0	1	53	3	0	6	5	5	4	64	0	0	4	1	8	0	70	3	0	0	1	52	0	1	0	2	4	0	0	1	0	2	3	6	0	0	1
Copmic2	29	Litter saprotroph	Coprinellus micaceus	Basidiomycota	Agaricomycetes	Agaricales	Psathyrellaceae	Coprinellus	0	18	1	4	0	1	40	2	0	6	6	3	6	46	0	0	6	0	7	0	49	3	0	0	0	16	0	2	0	1	3	0	0	1	0	1	3	13	0	0	1
Lacam2	30	Ectomycorrhiza	Laccaria amethystina	Basidiomycota	Agaricomycetes	Agaricales	Hydnangiaceae	Laccaria	0	7	2	2	0	0	19	2	3	11	2	1	0	2	0	0	0	0	4	0	1	2	0	0	2	14	0	1	0	1	2	0	0	0	0	2	3	4	0	0	0
Lacbi2	31	Ectomycorrhiza	Laccaria bicolor	Basidiomycota	Agaricomycetes	Agaricales	Hydnangiaceae	Laccaria	2	10	3	2	0	0	13	2	0	11	2	1	0	11	0	0	0	0	4	0	1	2	0	0	2	16	0	1	0	1	2	0	0	0	0	5	3	4	1	0	0
Cyapal1	32	Wood saprotroph	Cyathus pallidus	Basidiomycota	Agaricomycetes	Agaricales	Nidulariaceae	Cyathus	0	28	6	26	7	3	143	9	0	20	6	2	3	38	0	0	2	0	6	1	71	3	0	0	1	73	0	1	0	28	4	0	0	2	0	1	3	38	0	0	29
Cyaste1	33	Grass saprotroph	Cyathus stercoreus	Basidiomycota	Agaricomycetes	Agaricales	Nidulariaceae	Cyathus	0	41	7	30	5	3	122	11	0	20	5	1	3	31	0	0	1	0	8	1	85	3	0	0	1	116	0	1	0	30	2	0	0	3	0	1	2	33	0	0	54
Cyastr2	34	Wood saprotroph	Cyathus striatus	Basidiomycota	Agaricomycetes	Agaricales	Nidulariaceae	Cyathus	0	11	3	16	3	2	89	8	0	8	6	1	2	29	0	0	1	0	6	3	34	5	0	0	1	36	0	1	0	5	2	0	0	2	0	1	2	38	0	0	6
Mycden1	35	Wood saprotroph	Mycocalia denudata	Basidiomycota	Agaricomycetes	Agaricales	Nidulariaceae	Mycocalia	0	9	2	12	1	1	23	4	0	9	4	1	1	14	0	0	1	0	3	0	65	4	0	0	0	39	0	1	0	4	2	0	0	1	0	1	2	5	0	0	9
Nidsp1	36	Wood saprotroph	Nidula sp.	Basidiomycota	Agaricomycetes	Agaricales	Nidulariaceae	Nidula	0	20	2	8	2	3	73	9	1	8	6	3	2	31	0	0	1	0	4	1	45	5	0	0	1	39	0	0	0	6	2	0	0	4	0	1	2	16	0	0	23
Crula1	37	Wood saprotroph	Crucibulum laeve	Basidiomycota	Agaricomycetes	Agaricales	Nidulariaceae	Crucibulum	0	16	1	16	2	1	66	3	1	7	4	2	2	34	0	0	1	0	3	1	46	4	0	0	1	16	0	1	0	7	3	0	0	3	0	1	3	11	0	0	7
Agabi_varbisH97_2	38	Grass saprotroph	Agaricus bisporus H97	Basidiomycota	Agaricomycetes	Agaricales	Agaricaceae	Agaricus	0	12	1	3	0	1	33	5	0	9	4	1	1	13	0	0	1	0	2	1	16	2	0	0	1	12	0	1	0	1	1	0	0	1	0	1	3	8	0	0	0
Agabi_varbur_1	39	Grass saprotroph	Agaricus bisporus	Basidiomycota	Agaricomycetes	Agaricales	Agaricaceae	Agaricus	0	12	1	3	0	1	29	5	0	9	4	1	1	11	0	0	1	0	2	1	17	3	0	0	1	13	0	1	0	1	1	0	0	1	0	1	2	1	0	0	0
Agasi1	40	Grass saprotroph	Agaricus sinodeliciosus	Basidiomycota	Agaricomycetes	Agaricales	Agaricaceae	Agaricus	0	9	1	3	1	1	29	7	0	8	4	1	1	11	0	0	1	0	2	1	14	4	0	1	1	12	0	1	0	1	2	0	0	1	0	1	2	6	0	0	0
Macfu1	41	Litter saprotroph	Macrolepiota fuliginosa	Basidiomycota	Agaricomycetes	Agaricales	Agaricaceae	Macrolepiota	11	26	1	2	0	3	56	5	0	14	3	0	3	23	0	0	1	0	4	1	24	7	0	1	1	42	0	1	0	3	2	0	0	3	0	1	3	20	0	0	0
Lycper1	42	Litter saprotroph	Lycoperdon perlatum	Basidiomycota	Agaricomycetes	Agaricales	Lycoperdaceae	Lycoperdon	0	36	1	3	0	1	56	4	0	12	2	1	1	20	0	0	2	0	3	1	27	4	0	0	1	42	0	1	0	3	2	0	0	2	0	1	1	11	0	0	0
Amaapr1	43	Ectomycorrhiza	Amanita muscaria	Basidiomycota	Agaricomycetes	Agaricales	Amanitaceae	Amanita	0	19	1	1	1	0	5	5	0	4	7	5	0	3	0	0	0	0	2	0	0	4	0	0	3	10	0	1	0	1	2	0	0	0	0	1	3	7	0	0	10
Amamu1	44	Ectomycorrhiza	Amanita muscaria Koide	Basidiomycota	Agaricomycetes	Agaricales	Amanitaceae	Amanita	0	18	1	1	0	0	5	5	0	4	5	5	0	2	0	0	0	0	2	0	0	3	0	0	2	6	0	1	0	1	2	0	0	0	0	1	3	4	0	0	10
Amarub1	45	Ectomycorrhiza	Amanita rubescens	Basidiomycota	Agaricomycetes	Agaricales	Amanitaceae	Amanita	0	10	1	1	0	0	7	8	1	10	2	5	0	1	0	0	0	0	4	0	0	0	0	0	1	19	0	1	0	3	6	0	0	0	0	1	2	8	0	0	21
Amath1	46	Ectomycorrhiza	Amanita thiersii	Basidiomycota	Agaricomycetes	Agaricales	Amanitaceae	Amanita	2	13	1	1	0	1	10	2	0	6	2	6	1	16	0	0	1	0	3	1	11	5	0	0	1	9	0	1	0	2	1	0	0	2	0	1	2	6	0	0	8
Trima3	47	Ectomycorrhiza	Tricholoma matsutake	Basidiomycota	Agaricomycetes	Agaricales	Tricholomataceae	Tricholoma	3	12	1	1	1	0	12	4	2	5	1	7	0	2	0	0	0	0	3	0	1	4	0	0	2	3	0	1	0	1	2	0	0	1	0	1	4	14	2	0	0
Tripop1	48	Ectomycorrhiza	Tricholoma populinum	Basidiomycota	Agaricomycetes	Agaricales	Tricholomataceae	Tricholoma	1	7	1	1	0	0	13	12	0	7	1	9	0	3	0	0	0	0	2	0	1	4	0	0	1	13	0	2	0	5	2	0	0	0	0	1	3	12	2	0	0
Lepnud1	49	Litter saprotroph	Lepista nuda	Basidiomycota	Agaricomycetes	Agaricales	Clitocybaceae	Collybia	0	24	1	3	7	2	42	2	1	16	1	4	2	27	0	0	3	0	3	1	40	5	0	0	1	12	0	7	1	3	2	0	0	2	0	1	3	31	0	0	18
Lyoat1	50	Soil saprotroph	Lyophyllum atratum	Basidiomycota	Agaricomycetes	Agaricales	Lyophyllaceae	Lyophyllum	0	25	1	3	3	2	39	4	0	8	2	4	2	31	0	0	6	0	4	1	26	6	0	0	0	12	0	4	0	4	2	0	0	3	0	2	3	17	0	0	16
TerJ132_1	51	Grass saprotroph	Termitomyces sp.	Basidiomycota	Agaricomycetes	Agaricales	Lyophyllaceae	Termitomyces	0	14	1	2	3	2	19	3	1	7	2	2	1	10	0	0	0	0	2	0	22	5	0	0	1	7	0	0	0	2	2	0	0	2	0	1	2	10	0	0	3
Hypma1	52	Wood saprotroph	Hypsizygus marmoreus	Basidiomycota	Agaricomycetes	Agaricales	Lyophyllaceae	Hypsizygus	0	19	1	3	3	3	41	2	0	5	1	1	2	23	0	0	2	0	3	1	32	5	0	0	1	18	0	5	0	3	2	0	0	3	0	1	3	13	0	0	0
Cligib1	53	Litter saprotroph	Clitocybe gibba	Basidiomycota	Agaricomycetes	Agaricales		Infundibulicybe	0	14	1	12	3	1	51	3	0	5	1	1	2	18	0	0	1	0	2	1	29	4	0	0	1	16	0	1	0	3	2	0	0	2	0	2	1	33	0	0	25
Plucer1	54	Wood saprotroph	Pluteus cervinus	Basidiomycota	Agaricomycetes	Agaricales	Pluteaceae	Pluteus	0	11	0	18	0	1	12	5	4	7	2	2	2	24	0	0	6	0	3	1	30	6	0	1	2	19	0	5	0	4	2	0	0	1	0	1	4	13	0	0	2
Volvo1	55	Grass saprotroph	Volvariella volvacea	Basidiomycota	Agaricomycetes	Agaricales	Pluteaceae	Volvariella	0	11	0	8	0	1	27	5	0	4	2	0	1	30	0	0	3	0	3	3	56	4	0	0	1	10	0	1	0	4	2	0	0	1	0	1	3	9	0	0	2
Radcon1	56	Wood saprotroph	Radulomyces confluens	Basidiomycota	Agaricomycetes	Agaricales	Radulomycetaceae	Radulomyces	0	22	1	10	0	1	16	5	0	12	1	2	1	13	0	0	2	0	2	1	26	5	0	0	1	3	0	4	0	4	2	0	0	3	0	3	3	19	0	0	10
Aphpse1	57	Wood saprotroph	Aphanobasidium pseudotsugae	Basidiomycota	Agaricomycetes	Agaricales	Radulomycetaceae	Aphanobasidium	0	10	1	9	0	1	9	7	0	8	1	1	1	6	0	0	1	0	2	0	22	4	0	0	1	0	0	3	0	3	2	0	0	2	0	2	2	10	0	0	10
Ptegra1	58	Grass saprotroph	Pterula gracilis	Basidiomycota	Agaricomycetes	Agaricales	Pterulaceae	Pterula	2	16	0	3	1	1	16	9	0	12	8	1	1	31	0	0	0	0	2	2	23	6	0	0	1	17	0	1	0	5	2	0	0	2	0	1	3	16	0	0	3
Hygcoc2	59	Grass saprotroph	Hygrocybe coccinea	Basidiomycota	Agaricomycetes	Agaricales	Hygrophoraceae	Hygrocybe	0	2	2	0	18	0	22	1	0	8	1	0	0	1	0	0	0	0	0	0	0	1	0	0	1	8	0	3	0	2	4	0	0	0	0	1	4	15	0	0	0
Crison1	60	Pathogen	Cristinia sonorae	Basidiomycota	Agaricomycetes	Agaricales	Stephanosporaceae	Cristinia	1	12	1	21	0	1	17	7	1	5	5	0	2	15	0	0	0	0	3	0	29	4	0	0	0	5	0	1	0	2	2	0	0	1	0	1	3	6	0	0	0
PleosPC9_1	61	Wood saprotroph	Pleurotus ostreatus	Basidiomycota	Agaricomycetes	Agaricales	Pleurotaceae	Pleurotus	0	10	1	10	0	1	36	4	0	15	2	3	1	29	0	0	1	0	2	1	37	1	0	0	1	22	0	1	0	3	2	0	0	2	0	1	3	3	0	0	14
Pleery1	62	Wood saprotroph	Pleurotus eryngii	Basidiomycota	Agaricomycetes	Agaricales	Pleurotaceae	Pleurotus	0	10	1	9	10	1	29	5	0	14	2	1	1	31	0	0	1	0	2	1	45	4	0	0	1	15	0	1	0	3	2	0	0	2	0	1	3	11	0	0	7
Armga1	63	Wood saprotroph	Armillaria gallica	Basidiomycota	Agaricomycetes	Agaricales	Physalacriaceae	Armillaria	1	25	2	9	0	3	65	9	3	5	3	4	2	19	0	0	0	0	4	2	13	4	0	0	1	6	0	0	1	5	2	0	0	2	0	1	3	19	0	0	34
Armcep1	64	Wood saprotroph	Armillaria cepistipes	Basidiomycota	Agaricomycetes	Agaricales	Physalacriaceae	Armillaria	1	23	2	9	0	3	67	8	3	5	3	4	2	22	0	0	0	0	4	2	9	4	0	0	1	6	0	0	0	4	2	0	0	2	0	1	3	15	0	0	27
Armnab1	65	Wood saprotroph	Armillaria nabsnona	Basidiomycota	Agaricomycetes	Agaricales	Physalacriaceae	Armillaria	1	22	2	9	0	3	58	8	3	5	3	3	2	21	0	0	0	0	4	2	14	4	0	0	1	5	0	0	0	5	2	0	0	2	0	1	4	17	0	0	32
Armost1	66	Pathogen	Armillaria ostoyae	Basidiomycota	Agaricomycetes	Agaricales	Physalacriaceae	Armillaria	1	23	2	8	1	3	51	6	0	5	4	3	2	19	0	0	0	0	4	2	11	4	0	0	1	4	0	0	1	5	2	0	0	2	0	1	3	21	0	0	29
Armosto1	67	Wood saprotroph	Armillaria solidipes	Basidiomycota	Agaricomycetes	Agaricales	Physalacriaceae	Armillaria	1	24	2	8	0	3	54	6	2	5	4	4	2	19	0	0	0	0	4	2	10	4	0	0	1	5	0	0	0	4	2	0	0	2	0	1	4	20	0	0	31
Armbor1	68	Wood saprotroph	Armillaria borealis	Basidiomycota	Agaricomycetes	Agaricales	Physalacriaceae	Armillaria	1	23	2	9	0	3	59	9	0	5	3	3	2	21	0	0	0	0	4	2	13	3	0	0	1	4	0	0	0	5	2	0	0	2	0	1	3	22	0	0	32
Armfum1	69	Wood saprotroph	Armillaria fumosa	Basidiomycota	Agaricomycetes	Agaricales	Physalacriaceae	Armillaria	1	21	2	8	0	3	58	10	2	5	3	4	2	18	0	0	0	0	4	2	13	4	0	0	1	4	0	0	0	4	4	0	0	2	0	1	3	19	0	0	23
Armlut1	70	Litter saprotroph	Armillaria luteobubalina	Basidiomycota	Agaricomycetes	Agaricales	Physalacriaceae	Armillaria	1	26	2	8	0	5	59	12	4	5	4	4	3	22	0	0	0	0	5	2	12	4	0	0	1	9	0	0	0	5	3	0	0	2	0	1	3	27	0	0	33
Armnov1	71	Pathogen	Armillaria novae-zelandiae	Basidiomycota	Agaricomycetes	Agaricales	Physalacriaceae	Armillaria	1	22	3	8	0	4	53	10	1	5	3	4	3	21	0	0	0	0	4	2	12	4	0	0	1	2	0	0	0	5	4	0	0	2	0	1	3	22	0	0	20
Armme1_1	72	Pathogen	Armillaria mellea	Basidiomycota	Agaricomycetes	Agaricales	Physalacriaceae	Armillaria	1	24	3	11	0	3	52	8	4	7	3	4	2	24	0	0	0	0	4	2	11	3	0	0	1	6	0	0	0	3	2	0	0	1	0	1	3	13	0	0	2
Armect1	73	Litter saprotroph	Armillaria ectypa	Basidiomycota	Agaricomycetes	Agaricales	Physalacriaceae	Desarmillaria	1	25	2	6	0	5	40	9	0	5	2	3	3	18	0	0	0	0	4	1	9	4	0	0	1	3	0	0	0	6	2	0	0	2	0	1	3	10	0	0	7
Armtab1	74	Wood saprotroph	Armillaria tabescens	Basidiomycota	Agaricomycetes	Agaricales	Physalacriaceae	Desarmillaria	1	25	3	8	0	4	73	8	0	9	1	4	3	20	0	0	0	0	4	2	9	4	0	0	2	3	0	0	1	5	5	0	0	2	0	1	3	20	0	0	21
Guyne1	75	Wood saprotroph	Guyanagaster necrorhizus	Basidiomycota	Agaricomycetes	Agaricales	Physalacriaceae	Guyanagaster	2	19	2	6	0	1	33	6	0	4	2	3	2	18	0	0	0	0	3	2	9	3	0	0	1	3	0	0	1	3	2	0	0	2	0	1	3	9	0	0	8
Hymrad1	76	Wood saprotroph	Hymenopellis radicata	Basidiomycota	Agaricomycetes	Agaricales	Physalacriaceae	Hymenopellis	3	21	4	10	5	3	52	12	0	28	5	2	2	25	0	0	0	0	7	4	22	4	0	0	1	6	0	7	0	3	4	0	0	3	0	1	4	16	0	0	3
Oudmuc1	77	Wood saprotroph	Oudemansiella mucida	Basidiomycota	Agaricomycetes	Agaricales	Physalacriaceae	Mucidula	3	15	2	10	2	2	43	6	2	17	3	0	1	21	0	0	0	0	5	3	15	4	0	0	1	3	0	1	0	4	4	0	0	2	0	1	4	7	0	0	3
Cylto1	78	Wood saprotroph	Cylindrobasidium torrendii	Basidiomycota	Agaricomycetes	Agaricales	Physalacriaceae	Cylindrobasidium	5	3	0	1	1	2	16	4	0	4	2	2	3	25	0	0	0	0	3	3	8	10	0	0	1	9	0	1	0	4	3	0	0	2	0	1	4	6	0	0	1
Rhobu1	79	Litter saprotroph	Rhodocollybia butyracea	Basidiomycota	Agaricomycetes	Agaricales	Omphalotaceae	Rhodocollybia	1	20	1	3	0	0	38	2	2	6	2	3	0	4	0	0	0	0	5	0	20	7	0	0	1	3	0	0	0	3	1	0	1	3	0	1	4	16	0	0	6
Lenlat1	80	Wood saprotroph	Lentinula lateritia	Basidiomycota	Agaricomycetes	Agaricales	Omphalotaceae	Lentinula	1	12	1	6	2	1	23	5	1	5	2	2	1	12	0	0	0	0	4	0	23	4	0	0	1	2	0	1	0	5	1	0	0	3	0	1	3	12	0	0	7
Gymlu1	81	Wood saprotroph	Gymnopus luxurians	Basidiomycota	Agaricomycetes	Agaricales	Omphalotaceae	Collybiopsis	2	15	2	6	0	1	54	9	0	10	2	4	1	13	0	0	0	0	6	0	32	5	0	0	1	5	0	1	0	4	3	0	0	3	0	1	4	13	10	0	17
Gyman1	82	Litter saprotroph	Gymnopus androsaceus	Basidiomycota	Agaricomycetes	Agaricales	Omphalotaceae	Gymnopus	1	29	2	11	0	0	43	12	1	14	5	1	1	11	0	0	0	0	9	0	36	5	0	0	1	6	0	1	0	4	2	0	2	2	0	1	4	27	4	0	13
Gymear1	83	Soil saprotroph	Gymnopus earleae	Basidiomycota	Agaricomycetes	Agaricales	Omphalotaceae	Gymnopus	1	14	5	9	0	0	27	7	6	10	3	7	0	6	0	0	0	0	10	0	36	6	0	0	1	5	0	2	0	6	3	0	1	2	5	1	3	23	1	0	9
Ompol1	84	Wood saprotroph	Omphalotus olearius	Basidiomycota	Agaricomycetes	Agaricales	Omphalotaceae	Omphalotus	1	6	2	7	1	1	18	5	0	8	2	1	2	13	0	0	0	0	4	1	16	3	0	0	1	3	0	0	0	3	1	0	0	2	0	1	4	3	0	0	2
Denbi1	85	Wood saprotroph	Dendrothele bispora	Basidiomycota	Agaricomycetes	Agaricales		Dendrothele	5	38	5	14	1	3	81	15	2	41	4	1	1	23	0	0	1	0	6	1	29	4	0	0	1	5	0	0	0	3	1	0	0	3	0	1	3	20	0	0	12
Marfi1	86	Litter saprotroph	Marasmius fiardii	Basidiomycota	Agaricomycetes	Agaricales	Marasmiaceae	Marasmius	0	22	2	2	0	1	68	3	1	8	2	2	1	19	0	0	2	0	3	4	10	3	0	1	1	45	0	1	0	3	1	0	0	3	0	1	4	4	0	0	0
MroMCA2997_1	87	Pathogen	Moniliophthora roreri	Basidiomycota	Agaricomycetes	Agaricales	Marasmiaceae	Moniliophthora	0	28	2	3	2	2	58	8	0	9	1	8	3	25	0	0	1	0	1	4	20	5	0	1	1	7	0	4	0	2	3	0	0	4	0	1	3	13	0	0	0
Cysmur1	88	Pathogen	Cystostereum murrayi	Basidiomycota	Agaricomycetes	Agaricales	Cystostereaceae	Cystostereum	1	13	1	3	0	1	38	7	0	9	3	3	2	22	0	0	1	0	5	1	1	4	0	0	1	5	0	0	0	1	2	0	0	3	0	1	4	6	0	0	0
Mycflo1	89	Litter saprotroph	Mycena floridula	Basidiomycota	Agaricomycetes	Agaricales	Mycenaceae	Mycena	0	22	3	16	6	1	55	3	3	36	1	16	1	27	0	0	1	0	3	3	33	6	0	0	1	11	0	5	0	3	2	0	0	3	0	1	4	10	2	0	6
Schco_LoeD_1	90	Wood saprotroph	Schizophyllum commune	Basidiomycota	Agaricomycetes	Agaricales	Schizophyllaceae	Schizophyllum	4	2	0	1	0	1	22	4	1	3	4	1	3	22	0	8	0	0	4	2	5	4	0	0	1	19	0	1	0	1	3	0	0	1	0	1	4	4	0	1	0
Schrad1	91	Wood saprotroph	Schizophyllum radiatum	Basidiomycota	Agaricomycetes	Agaricales	Schizophyllaceae	Schizophyllum	5	5	0	2	1	1	20	5	0	2	6	4	5	28	0	11	0	0	4	3	5	5	0	0	1	20	0	1	0	1	3	0	0	2	0	1	4	5	0	1	0
Schfas1	92	Litter saprotroph	Schizophyllum fasciatum	Basidiomycota	Agaricomycetes	Agaricales	Schizophyllaceae	Schizophyllum	5	2	0	1	0	1	20	5	2	2	6	3	3	22	0	7	0	0	4	2	4	3	0	0	1	20	0	1	0	1	2	0	0	2	0	1	3	3	0	2	0
Auramp1	93	Wood saprotroph	Auriculariopsis ampla	Basidiomycota	Agaricomycetes	Agaricales	Schizophyllaceae	Auriculariopsis	5	4	0	1	1	1	22	4	0	2	4	3	3	23	0	8	0	0	6	2	3	4	0	0	1	16	0	1	0	1	3	0	0	1	0	1	2	4	0	1	0
Fishe1	94	Wood saprotroph	Fistulina hepatica	Basidiomycota	Agaricomycetes	Agaricales	Fistulinaceae	Fistulina	2	3	1	1	0	3	10	2	0	3	2	2	3	7	0	1	0	0	7	1	0	3	0	0	1	1	0	0	0	7	3	0	0	2	0	1	4	4	0	1	0
Niavib1	95	Wood saprotroph	Nia vibrissa	Basidiomycota	Agaricomycetes	Agaricales	Cyphellopsidaceae	Nia	0	11	0	1	0	1	27	0	0	5	1	2	5	19	0	0	3	0	3	0	19	4	0	0	1	7	0	1	0	1	2	0	0	1	0	1	2	4	0	0	0
Denmi1	96	Wood saprotroph	Dendrothele microspora	Basidiomycota	Agaricomycetes	Agaricales		Dendrothele	0	14	1	9	1	1	32	2	0	14	2	3	1	20	0	0	1	0	4	3	9	4	0	0	1	18	0	1	0	4	1	0	0	4	2	1	2	6	0	1	0
Mychae1	97	Wood saprotroph	Mycena haematopus	Basidiomycota	Agaricomycetes	Agaricales	Mycenaceae	Mycena	1	11	1	2	4	2	49	7	0	16	2	9	1	11	2	0	0	0	2	1	32	4	0	0	1	35	0	4	0	4	2	0	0	3	5	2	2	19	2	0	29
Mycsan1	98	Litter saprotroph	Mycena sanguinolenta	Basidiomycota	Agaricomycetes	Agaricales	Mycenaceae	Mycena	5	33	1	19	12	2	103	4	1	20	4	8	1	15	6	0	1	0	2	1	51	8	0	0	1	62	0	18	0	4	4	0	0	4	6	2	2	125	16	0	46
Mycgal1	99	Litter saprotroph	Mycena galopus	Basidiomycota	Agaricomycetes	Agaricales	Mycenaceae	Mycena	4	29	5	20	15	2	112	11	0	27	6	3	1	16	2	0	2	0	2	1	55	5	0	0	0	52	1	12	0	6	4	0	0	7	5	8	2	110	22	0	38
Mycalb1	100	Grass saprotroph	Mycena albidolilacea	Basidiomycota	Agaricomycetes	Agaricales	Mycenaceae	Mycena	3	32	1	26	8	4	101	7	2	32	3	11	1	15	0	0	1	0	4	2	51	5	0	0	1	43	0	10	0	5	5	0	0	6	9	4	2	78	9	0	40
Mycoli1	101	Grass saprotroph	Mycena olivaceomarginata	Basidiomycota	Agaricomycetes	Agaricales	Mycenaceae	Mycena	3	69	3	55	26	7	185	20	4	50	6	10	3	34	0	0	2	0	6	4	86	5	0	0	1	87	0	13	0	10	6	0	0	9	11	4	3	82	14	0	64
Favcal1_2	102	Wood saprotroph	Favolaschia claudopus	Basidiomycota	Agaricomycetes	Agaricales	Mycenaceae	Favolaschia	3	27	1	16	28	2	88	7	1	18	2	6	1	17	0	0	3	0	3	1	57	5	0	0	1	60	0	15	0	20	5	0	0	9	5	4	3	57	2	0	22
Mycvit1	103	Litter saprotroph	Mycena vitilis	Basidiomycota	Agaricomycetes	Agaricales	Mycenaceae	Mycena	2	23	1	22	7	2	61	12	0	17	3	8	1	18	0	0	1	0	5	2	30	8	0	0	1	23	0	5	0	7	5	0	0	3	10	2	3	24	2	0	21
Mycpol1	104	Wood saprotroph	Mycena polygramma	Basidiomycota	Agaricomycetes	Agaricales	Mycenaceae	Mycena	1	39	1	46	9	2	91	14	3	17	3	7	1	31	0	0	1	0	6	2	46	15	0	0	1	27	0	9	0	6	7	0	0	7	9	2	3	42	4	0	24
Mycrub1	105	Litter saprotroph	Mycena capillaripes	Basidiomycota	Agaricomycetes	Agaricales	Mycenaceae	Mycena	2	40	3	47	8	2	92	14	0	25	2	13	2	16	2	0	1	0	3	2	48	5	0	0	1	53	1	10	0	7	7	0	0	5	5	3	3	71	8	0	49
Myclep1	106	Litter saprotroph	Mycena leptocephala	Basidiomycota	Agaricomycetes	Agaricales	Mycenaceae	Mycena	8	52	12	54	29	2	158	27	3	31	16	9	1	30	7	0	1	0	5	2	76	6	0	0	1	134	1	15	2	6	22	0	0	6	13	5	3	77	16	0	63
Mycmet1	107	Litter saprotroph	Mycena metata	Basidiomycota	Agaricomycetes	Agaricales	Mycenaceae	Mycena	3	46	2	20	3	3	89	33	2	23	4	10	1	12	0	0	1	0	3	1	58	6	0	0	1	56	0	4	2	5	1	0	0	6	7	3	2	58	9	0	53
Mycale1	108	Litter saprotroph	Mycena alexandri	Basidiomycota	Agaricomycetes	Agaricales	Mycenaceae	Mycena	4	33	3	22	3	2	59	20	2	22	3	8	2	15	0	0	1	0	4	1	43	5	0	0	1	40	0	1	1	5	2	0	0	6	5	3	2	18	5	0	16
Mycfil1	109	Litter saprotroph	Mycena filopes	Basidiomycota	Agaricomycetes	Agaricales	Mycenaceae	Mycena	3	42	1	8	6	3	81	21	0	21	5	10	1	18	0	0	2	0	3	3	38	4	0	0	1	17	0	9	2	4	5	0	0	8	5	3	5	51	2	0	23
Mycbel1	110	Grass saprotroph	Mycena belliae	Basidiomycota	Agaricomycetes	Agaricales	Mycenaceae	Mycena	1	19	1	13	2	2	28	6	0	11	2	5	1	14	0	0	1	0	4	1	36	4	0	0	1	10	0	2	0	11	4	0	0	3	6	3	2	4	4	0	15
Myclat1	111	Grass saprotroph	Mycena latifolia	Basidiomycota	Agaricomycetes	Agaricales	Mycenaceae	Mycena	1	50	5	33	9	2	97	18	1	19	3	10	1	16	0	0	2	0	4	2	52	5	0	0	1	46	0	7	0	7	3	0	0	6	4	4	2	30	14	0	63
Mycros1	112	Litter saprotroph	Mycena rosella	Basidiomycota	Agaricomycetes	Agaricales	Mycenaceae	Mycena	2	29	1	14	7	2	112	17	1	16	6	9	1	17	0	0	3	0	4	1	35	5	0	0	1	32	0	4	0	8	2	0	0	5	3	4	2	23	4	0	23
Mycvul1	113	Litter saprotroph	Mycena vulgaris	Basidiomycota	Agaricomycetes	Agaricales	Mycenaceae	Mycena	1	49	2	28	10	2	129	28	1	36	5	8	2	18	0	0	2	0	7	2	60	7	0	0	1	61	1	10	1	7	2	0	0	6	6	4	2	101	8	0	51
Mycepi1	114	Litter saprotroph	Mycena epipterygia	Basidiomycota	Agaricomycetes	Agaricales	Mycenaceae	Mycena	1	58	2	45	47	2	85	8	2	18	4	7	1	15	2	0	1	0	4	1	44	5	0	0	1	39	0	7	1	6	2	0	0	7	4	7	2	32	15	0	26
Myccro1	115	Litter saprotroph	Mycena crocata	Basidiomycota	Agaricomycetes	Agaricales	Mycenaceae	Mycena	1	34	2	14	5	2	54	10	1	17	6	8	2	15	0	0	1	0	5	2	30	4	0	0	1	19	0	3	0	6	4	0	0	5	5	3	2	28	2	0	13
Mycgale1	116	Wood saprotroph	Mycena galericulata	Basidiomycota	Agaricomycetes	Agaricales	Mycenaceae	Mycena	2	51	5	27	2	3	115	15	0	23	4	15	3	15	0	0	2	0	7	0	52	5	0	0	1	62	0	8	0	13	8	0	0	3	10	6	2	30	3	0	46
Mycmac1	117	Wood saprotroph	Mycena maculata	Basidiomycota	Agaricomycetes	Agaricales	Mycenaceae	Mycena	2	19	3	11	3	2	49	6	1	15	3	5	1	9	0	0	1	0	4	0	30	6	0	0	1	42	0	5	0	6	3	0	0	3	4	2	3	17	2	0	15
Mycreb1	118	Litter saprotroph	Mycena rebaudengoi	Basidiomycota	Agaricomycetes	Agaricales	Mycenaceae	Mycena	3	53	1	19	22	2	161	12	2	63	7	17	3	25	4	0	2	0	3	6	56	6	0	0	1	88	0	12	6	7	3	0	0	8	9	3	2	101	3	0	36
Myc59_1	119	Litter saprotroph	Mycena sp.	Basidiomycota	Agaricomycetes	Agaricales	Mycenaceae	Mycena	2	28	4	20	11	6	82	11	0	17	4	9	2	14	7	0	1	0	6	5	42	5	0	0	1	27	0	5	0	9	3	0	0	6	5	2	2	33	2	0	24
Mycami1	120	Wood saprotroph	Mycena amicta	Basidiomycota	Agaricomycetes	Agaricales	Mycenaceae	Mycena	1	25	1	19	3	2	37	9	0	16	3	6	1	15	0	0	0	0	3	1	28	5	0	0	1	17	0	4	0	11	2	0	0	4	12	5	3	30	12	0	14
Mycpur1	121	Grass saprotroph	Mycena pura	Basidiomycota	Agaricomycetes	Agaricales	Mycenaceae	Mycena	1	16	2	16	1	2	60	12	0	24	1	6	1	7	0	0	1	0	1	1	29	4	0	0	1	30	4	11	0	5	1	0	0	4	4	3	1	61	9	0	19
Rorror1	122	Litter saprotroph	Roridomyces roridus	Basidiomycota	Agaricomycetes	Agaricales	Mycenaceae	Roridomyces	1	38	1	22	0	2	55	13	0	53	7	4	1	17	3	0	1	0	3	1	49	7	0	0	1	11	0	9	1	7	2	0	0	5	6	2	1	84	4	0	24
[truncated: 207 more columns]

## Sheet: Protease secreted
Table S5 - The count of secreted proteases
JGI_ID	CladeOrder	Ecology	SpeciesName	Phylum	Class	Order	Family	Genus	A01A	A01X	C13	I51	I63	I87	M14A	M23B	M28A	M28E	M28X	M35	M36	M38	M43B	S08A	S10	S28	I09	I29	I32	M26	M72	S06	S08B	S09X	I15	S16	C56	G01	I02	M12A	M24X	M28F	S41A	S53	C39	S09B	A02A	C110	T03
Phocon1	1	Wood saprotroph	Pholiota conissans	Basidiomycota	Agaricomycetes	Agaricales	Strophariaceae	Pholiota	12	0	1	3	0	0	1	0	0	4	1	2	5	0	3	4	9	3	0	0	2	0	0	0	0	0	0	1	6	1	1	0	1	0	1	2	0	0	0	0	0
Phosp1	2	Wood saprotroph	Pholiota sp.	Basidiomycota	Agaricomycetes	Agaricales	Strophariaceae	Pholiota	13	0	1	7	0	0	1	0	0	5	1	2	6	0	4	4	11	3	0	0	2	0	0	0	0	1	0	0	6	1	0	0	0	0	1	3	0	0	0	0	0
Phohig1	3	Soil saprotroph	Pholiota molesta	Basidiomycota	Agaricomycetes	Agaricales	Strophariaceae	Pholiota	16	0	0	5	0	0	1	0	0	2	1	1	5	1	3	6	12	2	0	0	0	0	0	0	0	0	0	0	10	3	3	0	0	0	0	2	0	1	0	0	0
Hypsu1	4	Wood saprotroph	Hypholoma sublateritium	Basidiomycota	Agaricomycetes	Agaricales	Strophariaceae	Hypholoma	13	0	1	4	0	1	1	0	2	2	1	1	5	1	1	4	12	3	0	0	0	0	0	0	0	1	0	0	4	2	3	0	0	1	1	5	0	0	0	0	0
Phoaln1	5	Soil saprotroph	Pholiota alnicola	Basidiomycota	Agaricomycetes	Agaricales	Strophariaceae	Flammula	9	0	1	3	0	1	1	0	0	2	0	2	5	0	2	2	11	3	0	0	2	0	0	0	0	0	0	0	1	0	4	0	0	0	1	2	0	0	0	0	0
Hebvel2	6	Ectomycorrhiza	Hebeloma brunneifolium	Basidiomycota	Agaricomycetes	Agaricales	Hymenogastraceae	Hebeloma	16	0	1	3	0	1	1	0	0	4	1	2	4	1	9	10	11	2	0	0	2	0	0	0	0	0	0	0	1	0	1	3	0	1	1	0	0	0	0	0	0
Hebcy2	7	Ectomycorrhiza	Hebeloma cylindrosporum	Basidiomycota	Agaricomycetes	Agaricales	Hymenogastraceae	Hebeloma	7	0	1	3	0	1	0	0	2	3	0	0	3	2	4	6	9	3	0	0	1	0	0	0	0	0	0	1	0	0	0	0	0	0	1	0	0	0	0	0	0
Psicub1_1	8	Grass saprotroph	Psilocybe cubensis	Basidiomycota	Agaricomycetes	Agaricales	Strophariaceae	Psilocybe	12	0	0	4	0	1	1	0	0	4	0	1	5	0	5	4	9	3	0	0	1	0	0	0	1	0	0	0	1	1	3	0	0	1	2	2	0	1	0	0	0
Psiser1	9	Litter saprotroph	Psilocybe serbica	Basidiomycota	Agaricomycetes	Agaricales	Strophariaceae	Psilocybe	15	0	0	2	0	1	0	0	2	3	1	1	7	1	5	5	7	2	0	0	1	0	0	0	0	0	0	0	2	1	5	0	1	1	0	3	0	1	0	0	0
Agrped1	10	Grass saprotroph	Agrocybe pediades	Basidiomycota	Agaricomycetes	Agaricales	Strophariaceae	Agrocybe	11	1	1	2	0	0	0	0	0	5	1	5	6	2	6	2	12	5	0	0	0	0	0	0	1	0	0	0	6	1	3	3	1	1	1	2	0	0	0	0	0
Agrpra2	11	Litter saprotroph	Agrocybe praecox	Basidiomycota	Agaricomycetes	Agaricales	Strophariaceae	Agrocybe	9	1	0	3	0	0	1	0	2	2	0	0	6	0	4	5	12	3	0	0	0	0	0	0	0	0	0	0	5	1	5	3	0	0	2	4	1	1	0	0	0
Gymch1	12	Wood saprotroph	Gymnopilus chrysopellus	Basidiomycota	Agaricomycetes	Agaricales	Hymenogastraceae	Gymnopilus	19	0	1	3	1	0	0	0	0	2	0	0	3	0	1	2	10	2	0	0	1	0	0	0	0	0	0	0	2	1	2	0	0	0	0	1	0	2	0	0	0
Gymjun1	13	Wood saprotroph	Gymnopilus junonius	Basidiomycota	Agaricomycetes	Agaricales	Hymenogastraceae	Gymnopilus	17	0	0	3	0	0	1	0	0	2	0	0	2	0	0	2	12	1	0	1	0	0	0	0	1	0	0	0	0	1	1	1	1	0	0	0	0	0	0	0	0
Galma1	14	Wood saprotroph	Galerina marginata	Basidiomycota	Agaricomycetes	Agaricales	Strophariaceae	Galerina	17	0	1	2	0	0	1	0	1	2	1	0	4	1	3	9	9	2	0	0	3	0	0	0	0	0	0	0	0	2	2	2	1	1	1	5	0	1	0	0	0
Crafun1	15	Soil saprotroph	Crassisporium funariophilum	Basidiomycota	Agaricomycetes	Agaricales	Crassisporiaceae	Crassisporium	7	0	0	4	0	0	1	0	0	5	1	1	8	0	6	6	8	1	0	0	1	0	0	0	0	1	0	0	1	0	1	0	1	1	0	0	0	0	0	0	0
Corgl3	16	Ectomycorrhiza	Phlegmacium glaucopus	Basidiomycota	Agaricomycetes	Agaricales	Cortinariaceae	Phlegmacium	11	0	0	3	0	0	1	0	0	3	0	0	1	1	0	4	6	2	0	1	0	0	0	0	0	0	0	0	0	0	0	0	0	0	0	2	0	0	0	0	0
Crevar1	17	Wood saprotroph	Crepidotus variabilis	Basidiomycota	Agaricomycetes	Agaricales	Crepidotaceae	Crepidotus	11	0	1	4	0	0	3	0	0	3	1	2	8	1	7	11	11	3	3	0	6	0	0	0	1	0	0	0	3	0	1	0	0	1	3	1	0	1	0	0	0
Creces1	18	Wood saprotroph	Crepidotus cesatii	Basidiomycota	Agaricomycetes	Agaricales	Crepidotaceae	Crepidotus	8	1	1	3	0	0	2	0	0	3	0	2	6	0	10	14	10	4	0	0	5	0	0	0	2	0	0	0	1	0	1	0	0	1	3	2	0	0	0	0	0
Inolan1	19	Wood saprotroph	Inosperma lanatodiscum	Basidiomycota	Agaricomycetes	Agaricales	Inocybaceae	Inosperma	12	0	0	6	0	0	5	0	0	2	0	0	2	0	13	32	8	1	4	0	0	0	0	0	2	0	0	0	2	0	3	0	0	0	0	1	0	1	0	0	0
Phapla1	20	Wood saprotroph	Phaeosolenia platensis	Basidiomycota	Agaricomycetes	Agaricales	Chromocyphellaceae	Phaeosolenia	3	1	1	0	0	0	6	0	0	7	0	4	9	0	12	15	5	2	0	0	5	0	0	0	0	0	0	0	4	0	4	0	0	5	1	1	0	0	0	0	0
Panpap1	21	Grass saprotroph	Panaeolus papilionaceus	Basidiomycota	Agaricomycetes	Agaricales	Galeropsidaceae	Panaeolus	8	0	0	3	0	0	4	0	0	5	0	3	7	0	12	10	14	0	3	0	1	0	0	0	1	0	0	0	7	0	4	1	0	1	1	2	0	0	0	1	0
Conapa1	22	Grass saprotroph	Conocybe apala	Basidiomycota	Agaricomycetes	Agaricales	Bolbitiaceae	Conocybe	9	1	0	4	0	1	1	0	0	5	1	6	10	0	6	11	10	6	1	0	1	0	0	0	0	0	0	0	1	0	2	6	0	1	0	0	0	0	0	0	1
Bolvit1	23	Grass saprotroph	Bolbitius vitellinus	Basidiomycota	Agaricomycetes	Agaricales	Bolbitiaceae	Bolbitius	7	0	0	1	0	1	1	0	0	4	0	3	4	2	8	7	10	4	0	0	0	0	0	0	0	1	0	1	6	0	3	17	0	11	0	0	0	0	0	0	0
Copci1	24	Litter saprotroph	Coprinopsis cinerea	Basidiomycota	Agaricomycetes	Agaricales	Psathyrellaceae	Coprinopsis	3	3	0	3	0	0	1	0	6	5	0	0	7	1	19	8	3	1	0	0	3	0	0	0	0	0	0	0	2	0	6	0	0	1	1	0	0	0	0	0	0
Copscl1	25	Grass saprotroph	Coprinopsis sclerotiger	Basidiomycota	Agaricomycetes	Agaricales	Psathyrellaceae	Coprinopsis	4	0	1	5	0	0	0	0	4	3	0	0	6	0	9	27	2	1	1	0	2	0	0	0	0	0	0	0	0	0	20	0	0	0	1	1	0	0	0	1	0
Copmar1	26	Grass saprotroph	Coprinopsis marcescibilis	Basidiomycota	Agaricomycetes	Agaricales	Psathyrellaceae	Coprinopsis	3	2	1	3	0	0	1	0	3	5	0	1	2	1	23	13	4	1	0	1	5	0	0	0	0	0	0	0	1	0	4	0	0	1	1	0	0	0	0	0	0
Coppel1	27	Grass saprotroph	Coprinellus pellucidus	Basidiomycota	Agaricomycetes	Agaricales	Psathyrellaceae	Coprinellus	3	1	1	1	0	0	1	0	1	5	0	0	4	0	10	9	4	5	0	0	4	0	0	0	0	0	0	0	0	0	6	0	0	4	0	0	0	0	0	0	0
Copang1	28	Litter saprotroph	Coprinellus angulatus	Basidiomycota	Agaricomycetes	Agaricales	Psathyrellaceae	Tulosesus	5	0	1	5	0	1	2	0	0	5	0	7	15	0	7	10	10	3	0	0	5	0	0	0	0	0	0	0	12	0	3	0	0	5	2	0	0	0	0	0	0
Copmic2	29	Litter saprotroph	Coprinellus micaceus	Basidiomycota	Agaricomycetes	Agaricales	Psathyrellaceae	Coprinellus	2	1	1	3	0	0	1	0	4	3	1	0	7	0	11	21	5	3	0	0	4	0	0	0	0	0	0	0	1	0	4	0	0	0	1	1	0	1	0	0	0
Lacam2	30	Ectomycorrhiza	Laccaria amethystina	Basidiomycota	Agaricomycetes	Agaricales	Hydnangiaceae	Laccaria	11	0	0	1	0	1	1	0	0	2	1	0	2	2	3	2	5	2	0	0	0	0	0	0	0	0	0	0	0	0	1	0	0	0	0	1	0	1	0	0	0
Lacbi2	31	Ectomycorrhiza	Laccaria bicolor	Basidiomycota	Agaricomycetes	Agaricales	Hydnangiaceae	Laccaria	9	0	0	1	0	1	1	1	0	2	0	0	5	1	3	2	4	1	0	0	0	0	0	0	0	0	0	0	0	0	1	0	0	0	0	1	0	1	0	0	0
Cyapal1	32	Wood saprotroph	Cyathus pallidus	Basidiomycota	Agaricomycetes	Agaricales	Nidulariaceae	Cyathus	32	1	1	4	1	0	0	0	0	4	1	2	4	3	19	10	21	3	4	0	0	0	0	0	0	0	0	0	4	0	2	0	0	1	2	5	0	2	0	0	0
Cyaste1	33	Grass saprotroph	Cyathus stercoreus	Basidiomycota	Agaricomycetes	Agaricales	Nidulariaceae	Cyathus	39	1	1	4	0	1	0	0	0	4	0	1	6	2	14	12	23	4	4	0	0	0	0	0	0	0	0	0	4	0	0	0	1	1	2	2	0	1	0	0	0
Cyastr2	34	Wood saprotroph	Cyathus striatus	Basidiomycota	Agaricomycetes	Agaricales	Nidulariaceae	Cyathus	16	1	1	3	0	0	0	0	0	5	1	1	4	0	7	4	18	4	1	0	0	0	0	0	0	0	0	0	3	0	0	0	0	1	1	2	0	1	0	0	0
Mycden1	35	Wood saprotroph	Mycocalia denudata	Basidiomycota	Agaricomycetes	Agaricales	Nidulariaceae	Mycocalia	16	1	0	2	0	0	2	0	0	4	1	0	4	0	2	2	11	3	0	0	1	0	0	0	0	0	0	0	0	4	0	1	0	0	1	0	0	0	0	0	0
Nidsp1	36	Wood saprotroph	Nidula sp.	Basidiomycota	Agaricomycetes	Agaricales	Nidulariaceae	Nidula	13	1	1	2	0	0	1	0	0	5	1	1	12	2	5	2	15	4	0	0	1	0	0	0	0	0	0	0	0	2	0	0	1	1	0	0	0	0	0	0	0
Crula1	37	Wood saprotroph	Crucibulum laeve	Basidiomycota	Agaricomycetes	Agaricales	Nidulariaceae	Crucibulum	10	1	0	3	0	0	1	0	3	3	0	0	5	1	6	4	14	4	0	0	1	0	0	0	0	0	0	0	1	0	0	0	1	1	1	2	0	0	0	0	0
Agabi_varbisH97_2	38	Grass saprotroph	Agaricus bisporus H97	Basidiomycota	Agaricomycetes	Agaricales	Agaricaceae	Agaricus	7	0	1	1	1	1	1	0	1	2	1	1	4	2	1	5	8	2	1	1	1	1	1	1	1	1	0	0	0	0	0	0	0	0	0	0	0	0	0	0	0
Agabi_varbur_1	39	Grass saprotroph	Agaricus bisporus	Basidiomycota	Agaricomycetes	Agaricales	Agaricaceae	Agaricus	7	1	1	2	1	1	1	2	1	2	1	1	4	1	2	7	8	3	0	0	0	0	0	0	0	0	0	0	0	0	0	0	0	0	0	0	0	0	0	0	0
Agasi1	40	Grass saprotroph	Agaricus sinodeliciosus	Basidiomycota	Agaricomycetes	Agaricales	Agaricaceae	Agaricus	9	0	1	5	1	1	0	0	1	2	0	1	3	2	2	7	8	2	0	1	0	0	0	0	1	0	1	1	0	0	0	0	0	0	0	0	0	0	0	0	0
Macfu1	41	Litter saprotroph	Macrolepiota fuliginosa	Basidiomycota	Agaricomycetes	Agaricales	Agaricaceae	Macrolepiota	17	0	1	4	0	1	1	0	0	3	1	2	5	0	5	4	11	3	2	0	0	0	0	0	0	0	0	1	0	0	1	0	0	1	2	1	0	1	0	0	0
Lycper1	42	Litter saprotroph	Lycoperdon perlatum	Basidiomycota	Agaricomycetes	Agaricales	Lycoperdaceae	Lycoperdon	11	1	0	5	0	1	2	0	2	2	0	1	9	1	4	7	17	3	0	0	0	0	0	0	0	0	0	1	0	0	0	0	1	0	0	1	0	0	0	0	0
Amaapr1	43	Ectomycorrhiza	Amanita muscaria	Basidiomycota	Agaricomycetes	Agaricales	Amanitaceae	Amanita	26	0	1	1	0	0	0	0	0	3	0	0	2	1	0	14	9	3	0	0	0	0	0	0	0	0	0	0	0	32	0	0	0	0	0	0	0	0	1	0	0
Amamu1	44	Ectomycorrhiza	Amanita muscaria Koide	Basidiomycota	Agaricomycetes	Agaricales	Amanitaceae	Amanita	23	0	0	1	1	0	0	0	1	0	0	0	2	2	0	6	10	2	0	0	0	0	0	0	0	0	0	0	0	9	0	0	0	1	0	0	0	0	0	0	0
Amarub1	45	Ectomycorrhiza	Amanita rubescens	Basidiomycota	Agaricomycetes	Agaricales	Amanitaceae	Amanita	22	0	1	1	0	1	0	0	0	1	1	2	3	1	0	2	7	4	0	0	0	0	0	0	0	0	0	0	0	13	0	0	0	0	0	0	0	1	0	0	0
Amath1	46	Ectomycorrhiza	Amanita thiersii	Basidiomycota	Agaricomycetes	Agaricales	Amanitaceae	Amanita	8	0	0	2	0	0	0	0	4	3	0	10	6	1	10	10	12	3	2	0	0	0	0	0	0	0	0	0	0	0	0	0	0	1	0	0	0	1	0	2	1
Trima3	47	Ectomycorrhiza	Tricholoma matsutake	Basidiomycota	Agaricomycetes	Agaricales	Tricholomataceae	Tricholoma	8	0	0	0	0	0	1	1	0	2	0	0	3	1	1	1	6	3	0	0	0	0	0	0	1	0	0	0	0	0	0	0	0	1	1	0	0	0	0	0	0
Tripop1	48	Ectomycorrhiza	Tricholoma populinum	Basidiomycota	Agaricomycetes	Agaricales	Tricholomataceae	Tricholoma	14	0	0	1	0	0	1	0	0	3	0	0	4	0	2	2	12	4	0	0	0	0	0	0	0	0	0	1	0	0	2	0	0	0	0	0	0	0	0	0	0
Lepnud1	49	Litter saprotroph	Lepista nuda	Basidiomycota	Agaricomycetes	Agaricales	Clitocybaceae	Collybia	4	0	0	1	1	1	2	0	0	8	0	2	11	0	3	5	9	2	4	0	0	0	0	0	0	0	0	1	1	0	0	0	0	0	1	0	0	1	0	0	0
Lyoat1	50	Soil saprotroph	Lyophyllum atratum	Basidiomycota	Agaricomycetes	Agaricales	Lyophyllaceae	Lyophyllum	14	0	1	4	0	1	1	0	0	5	0	2	11	0	8	3	9	4	1	0	0	0	0	0	0	0	0	0	0	1	1	0	0	1	1	1	1	0	0	0	0
TerJ132_1	51	Grass saprotroph	Termitomyces sp.	Basidiomycota	Agaricomycetes	Agaricales	Lyophyllaceae	Termitomyces	9	0	1	3	0	0	0	0	0	2	1	0	2	0	1	3	7	1	1	0	0	0	0	0	0	0	0	0	0	0	0	0	0	0	1	0	0	0	0	0	0
Hypma1	52	Wood saprotroph	Hypsizygus marmoreus	Basidiomycota	Agaricomycetes	Agaricales	Lyophyllaceae	Hypsizygus	9	1	1	4	0	1	0	0	0	6	1	0	8	0	5	4	8	2	2	0	0	0	0	0	0	0	0	0	0	0	2	0	0	1	3	1	0	0	0	0	0
Cligib1	53	Litter saprotroph	Clitocybe gibba	Basidiomycota	Agaricomycetes	Agaricales		Infundibulicybe	32	0	0	1	0	1	0	0	0	3	0	0	13	1	3	2	10	3	0	2	0	0	0	0	1	0	0	0	0	0	0	0	0	0	1	0	0	0	0	0	0
Plucer1	54	Wood saprotroph	Pluteus cervinus	Basidiomycota	Agaricomycetes	Agaricales	Pluteaceae	Pluteus	14	0	0	3	0	0	0	0	0	4	1	5	6	1	10	10	7	3	0	0	0	0	0	0	0	1	0	0	0	0	0	0	0	0	2	2	0	0	0	0	0
Volvo1	55	Grass saprotroph	Volvariella volvacea	Basidiomycota	Agaricomycetes	Agaricales	Pluteaceae	Volvariella	10	0	0	1	0	0	1	0	4	3	0	2	6	1	15	14	4	1	3	0	0	0	0	0	0	0	0	0	1	0	0	0	0	1	1	0	0	0	0	0	0
Radcon1	56	Wood saprotroph	Radulomyces confluens	Basidiomycota	Agaricomycetes	Agaricales	Radulomycetaceae	Radulomyces	26	0	0	2	1	0	0	0	0	2	0	0	5	1	0	1	24	7	0	0	0	0	0	0	0	0	0	0	0	0	0	0	0	0	7	4	0	0	0	0	1
Aphpse1	57	Wood saprotroph	Aphanobasidium pseudotsugae	Basidiomycota	Agaricomycetes	Agaricales	Radulomycetaceae	Aphanobasidium	20	0	0	2	0	0	1	0	0	1	0	1	1	0	0	1	10	3	0	0	0	0	0	0	0	0	0	0	0	0	0	0	0	0	1	4	0	0	0	0	0
Ptegra1	58	Grass saprotroph	Pterula gracilis	Basidiomycota	Agaricomycetes	Agaricales	Pterulaceae	Pterula	8	0	0	2	0	1	4	0	4	9	0	6	12	3	1	1	3	2	0	0	0	0	0	0	0	1	0	0	2	0	2	0	0	0	2	0	0	0	0	0	0
Hygcoc2	59	Grass saprotroph	Hygrocybe coccinea	Basidiomycota	Agaricomycetes	Agaricales	Hygrophoraceae	Hygrocybe	23	0	0	1	0	0	2	1	0	2	1	0	2	0	0	1	5	1	0	0	0	0	0	0	0	0	0	0	0	0	0	2	0	0	1	0	0	0	0	0	0
Crison1	60	Pathogen	Cristinia sonorae	Basidiomycota	Agaricomycetes	Agaricales	Stephanosporaceae	Cristinia	29	2	1	2	0	1	1	0	1	2	0	0	5	0	4	2	9	9	0	0	0	0	0	0	0	0	0	0	1	0	0	0	0	0	3	1	0	0	0	0	0
PleosPC9_1	61	Wood saprotroph	Pleurotus ostreatus	Basidiomycota	Agaricomycetes	Agaricales	Pleurotaceae	Pleurotus	11	0	1	2	0	1	0	1	0	5	0	0	3	1	6	6	4	4	0	0	1	0	1	0	0	0	0	0	2	0	2	0	0	0	0	1	0	0	0	0	0
Pleery1	62	Wood saprotroph	Pleurotus eryngii	Basidiomycota	Agaricomycetes	Agaricales	Pleurotaceae	Pleurotus	15	0	1	2	0	1	1	0	0	6	0	1	2	0	9	7	8	4	0	0	0	0	0	0	0	0	0	1	1	0	1	0	0	1	0	1	0	0	0	0	0
Armga1	63	Wood saprotroph	Armillaria gallica	Basidiomycota	Agaricomycetes	Agaricales	Physalacriaceae	Armillaria	18	0	1	2	0	0	1	0	1	3	1	3	7	1	3	4	10	8	3	0	0	0	0	0	0	0	0	0	0	0	4	0	0	1	1	3	0	0	0	0	0
Armcep1	64	Wood saprotroph	Armillaria cepistipes	Basidiomycota	Agaricomycetes	Agaricales	Physalacriaceae	Armillaria	16	0	0	3	0	0	1	0	1	2	0	1	4	0	3	3	10	5	1	0	0	0	0	0	0	0	0	0	1	0	5	0	1	1	0	3	0	0	0	0	0
Armnab1	65	Wood saprotroph	Armillaria nabsnona	Basidiomycota	Agaricomycetes	Agaricales	Physalacriaceae	Armillaria	17	0	1	3	0	0	1	0	0	4	0	3	6	0	2	4	11	7	2	0	0	0	0	0	0	0	0	0	1	0	3	0	1	0	0	3	1	0	0	0	0
Armost1	66	Pathogen	Armillaria ostoyae	Basidiomycota	Agaricomycetes	Agaricales	Physalacriaceae	Armillaria	18	0	1	3	0	0	0	0	0	4	0	3	6	0	1	5	11	7	3	0	0	0	0	0	0	0	0	0	0	0	3	0	0	0	0	2	0	1	0	0	0
Armosto1	67	Wood saprotroph	Armillaria solidipes	Basidiomycota	Agaricomycetes	Agaricales	Physalacriaceae	Armillaria	15	0	1	3	0	0	1	0	0	5	0	2	7	0	2	6	9	3	2	0	0	0	0	0	0	0	0	0	0	0	3	0	0	0	0	1	0	1	0	0	0
Armbor1	68	Wood saprotroph	Armillaria borealis	Basidiomycota	Agaricomycetes	Agaricales	Physalacriaceae	Armillaria	19	0	1	5	0	0	1	0	0	5	0	2	5	0	3	4	11	7	4	0	0	0	0	0	0	0	0	0	1	0	4	0	0	0	0	2	1	0	0	0	0
Armfum1	69	Wood saprotroph	Armillaria fumosa	Basidiomycota	Agaricomycetes	Agaricales	Physalacriaceae	Armillaria	18	0	1	3	0	0	1	0	0	3	0	3	4	0	3	6	8	7	1	0	0	0	0	0	0	0	0	0	2	0	5	0	0	0	0	2	0	0	0	0	1
Armlut1	70	Litter saprotroph	Armillaria luteobubalina	Basidiomycota	Agaricomycetes	Agaricales	Physalacriaceae	Armillaria	16	0	1	4	0	0	1	0	0	6	0	2	7	1	2	5	13	9	1	0	0	0	0	0	0	0	0	0	2	0	7	0	1	0	0	2	0	1	0	0	0
Armnov1	71	Pathogen	Armillaria novae-zelandiae	Basidiomycota	Agaricomycetes	Agaricales	Physalacriaceae	Armillaria	17	0	0	3	0	0	1	0	0	4	1	2	8	0	3	5	7	7	0	0	0	0	0	0	0	0	0	0	1	0	4	0	1	0	1	2	1	1	0	0	0
Armme1_1	72	Pathogen	Armillaria mellea	Basidiomycota	Agaricomycetes	Agaricales	Physalacriaceae	Armillaria	13	0	0	3	0	1	0	0	0	4	1	4	4	0	1	1	6	6	1	0	0	0	0	0	0	0	0	0	1	0	5	0	1	0	1	2	0	0	0	0	0
Armect1	73	Litter saprotroph	Armillaria ectypa	Basidiomycota	Agaricomycetes	Agaricales	Physalacriaceae	Desarmillaria	14	0	1	2	0	0	1	0	0	2	1	2	4	0	3	4	9	6	2	0	0	0	0	0	0	1	0	0	1	0	3	0	0	0	0	1	0	1	0	0	0
Armtab1	74	Wood saprotroph	Armillaria tabescens	Basidiomycota	Agaricomycetes	Agaricales	Physalacriaceae	Desarmillaria	16	0	1	5	0	0	1	0	0	3	0	6	14	0	3	5	12	4	1	0	0	0	0	0	0	0	0	0	1	0	7	0	0	0	1	1	0	0	0	0	0
Guyne1	75	Wood saprotroph	Guyanagaster necrorhizus	Basidiomycota	Agaricomycetes	Agaricales	Physalacriaceae	Guyanagaster	9	0	0	6	0	0	0	0	0	3	0	0	0	0	2	3	10	6	0	0	0	0	0	0	0	0	0	0	0	0	2	0	1	0	1	1	0	1	0	0	0
Hymrad1	76	Wood saprotroph	Hymenopellis radicata	Basidiomycota	Agaricomycetes	Agaricales	Physalacriaceae	Hymenopellis	19	0	0	5	0	1	1	0	0	4	1	4	10	4	4	2	14	9	0	1	0	0	0	0	0	0	0	1	1	0	0	0	1	0	0	2	0	0	0	0	2
Oudmuc1	77	Wood saprotroph	Oudemansiella mucida	Basidiomycota	Agaricomycetes	Agaricales	Physalacriaceae	Mucidula	9	0	0	2	0	0	1	0	0	4	1	2	6	4	11	3	7	5	0	0	0	0	0	0	0	0	1	1	1	0	0	0	0	0	1	2	0	0	0	1	1
Cylto1	78	Wood saprotroph	Cylindrobasidium torrendii	Basidiomycota	Agaricomycetes	Agaricales	Physalacriaceae	Cylindrobasidium	9	0	1	2	0	0	1	0	0	8	1	4	9	1	7	1	7	1	0	0	0	0	0	0	0	0	0	0	4	1	0	0	0	0	1	1	0	0	0	0	0
Rhobu1	79	Litter saprotroph	Rhodocollybia butyracea	Basidiomycota	Agaricomycetes	Agaricales	Omphalotaceae	Rhodocollybia	10	0	0	4	0	0	1	0	0	3	0	0	0	1	0	3	6	3	0	0	0	0	0	0	0	0	0	0	0	3	0	0	0	0	0	3	0	0	0	0	1
Lenlat1	80	Wood saprotroph	Lentinula lateritia	Basidiomycota	Agaricomycetes	Agaricales	Omphalotaceae	Lentinula	16	0	0	2	0	0	0	0	0	2	0	0	0	1	0	1	7	2	0	0	0	0	0	0	0	2	0	0	0	4	0	0	1	0	0	0	0	0	0	0	2
Gymlu1	81	Wood saprotroph	Gymnopus luxurians	Basidiomycota	Agaricomycetes	Agaricales	Omphalotaceae	Collybiopsis	22	0	0	4	0	0	1	1	1	3	0	0	0	2	1	1	12	4	0	0	0	0	0	0	0	0	0	0	0	4	1	0	0	0	1	7	0	0	0	0	0
Gyman1	82	Litter saprotroph	Gymnopus androsaceus	Basidiomycota	Agaricomycetes	Agaricales	Omphalotaceae	Gymnopus	18	0	0	4	0	0	1	0	1	3	0	0	0	0	0	3	10	3	0	1	0	0	0	0	0	0	0	0	0	9	1	0	1	0	0	10	0	0	0	0	1
Gymear1	83	Soil saprotroph	Gymnopus earleae	Basidiomycota	Agaricomycetes	Agaricales	Omphalotaceae	Gymnopus	23	0	0	3	0	1	0	0	0	5	0	0	0	0	0	1	9	4	0	0	0	0	0	0	0	0	0	0	0	9	0	0	0	0	0	5	0	0	0	0	2
Ompol1	84	Wood saprotroph	Omphalotus olearius	Basidiomycota	Agaricomycetes	Agaricales	Omphalotaceae	Omphalotus	16	0	0	3	0	0	0	0	0	3	0	0	1	0	0	1	8	0	0	0	0	0	0	0	0	0	0	0	0	1	1	0	0	0	0	3	0	0	0	0	0
Denbi1	85	Wood saprotroph	Dendrothele bispora	Basidiomycota	Agaricomycetes	Agaricales		Dendrothele	25	0	1	7	0	0	1	0	0	8	1	2	2	9	1	3	11	2	0	0	0	0	0	0	0	0	0	0	1	0	1	0	0	0	1	0	0	0	0	0	2
Marfi1	86	Litter saprotroph	Marasmius fiardii	Basidiomycota	Agaricomycetes	Agaricales	Marasmiaceae	Marasmius	7	0	0	4	0	1	1	0	3	6	0	4	13	0	0	4	14	4	1	0	0	0	0	0	0	0	0	0	1	0	1	0	0	0	1	4	0	0	0	0	0
MroMCA2997_1	87	Pathogen	Moniliophthora roreri	Basidiomycota	Agaricomycetes	Agaricales	Marasmiaceae	Moniliophthora	12	0	0	4	0	0	1	0	0	5	1	2	13	2	2	4	14	3	0	0	0	0	0	0	0	0	0	0	2	0	4	0	0	2	1	2	0	0	0	0	1
Cysmur1	88	Pathogen	Cystostereum murrayi	Basidiomycota	Agaricomycetes	Agaricales	Cystostereaceae	Cystostereum	10	0	0	4	0	0	3	0	0	6	0	4	4	1	5	4	12	6	3	0	0	0	0	0	0	0	0	0	0	0	0	0	1	2	1	0	0	1	0	0	0
Mycflo1	89	Litter saprotroph	Mycena floridula	Basidiomycota	Agaricomycetes	Agaricales	Mycenaceae	Mycena	26	1	0	3	0	0	0	0	1	3	0	2	7	3	4	1	10	7	0	0	0	0	0	0	0	0	0	0	0	2	2	0	0	0	1	7	0	0	1	0	1
Schco_LoeD_1	90	Wood saprotroph	Schizophyllum commune	Basidiomycota	Agaricomycetes	Agaricales	Schizophyllaceae	Schizophyllum	14	0	1	2	0	0	1	0	0	5	1	5	4	2	2	1	7	3	0	0	0	0	0	0	0	1	0	0	2	1	0	0	0	0	1	1	0	1	0	0	1
Schrad1	91	Wood saprotroph	Schizophyllum radiatum	Basidiomycota	Agaricomycetes	Agaricales	Schizophyllaceae	Schizophyllum	18	0	1	8	0	0	1	0	0	6	2	4	4	0	2	1	5	4	0	0	0	0	0	0	0	3	0	0	3	1	0	0	0	0	1	1	0	1	0	1	1
Schfas1	92	Litter saprotroph	Schizophyllum fasciatum	Basidiomycota	Agaricomycetes	Agaricales	Schizophyllaceae	Schizophyllum	11	0	1	3	0	0	2	0	0	5	0	2	4	0	1	0	1	2	0	1	0	0	0	0	0	1	0	0	1	0	0	0	0	0	0	2	0	1	0	0	1
Auramp1	93	Wood saprotroph	Auriculariopsis ampla	Basidiomycota	Agaricomycetes	Agaricales	Schizophyllaceae	Auriculariopsis	13	0	1	5	0	0	2	0	0	9	0	5	6	0	2	0	6	4	0	0	0	0	0	0	0	0	0	0	2	0	0	0	0	0	0	2	0	1	0	0	0
Fishe1	94	Wood saprotroph	Fistulina hepatica	Basidiomycota	Agaricomycetes	Agaricales	Fistulinaceae	Fistulina	8	0	0	0	0	0	0	0	0	1	1	0	0	0	0	2	3	1	0	1	0	0	0	0	0	0	0	0	0	0	0	0	0	0	0	1	0	0	0	0	0
Niavib1	95	Wood saprotroph	Nia vibrissa	Basidiomycota	Agaricomycetes	Agaricales	Cyphellopsidaceae	Nia	8	0	0	1	0	0	5	0	0	6	0	1	1	0	5	24	3	2	3	0	1	0	0	0	0	1	0	0	1	0	0	0	0	3	1	0	0	2	0	0	0
Denmi1	96	Wood saprotroph	Dendrothele microspora	Basidiomycota	Agaricomycetes	Agaricales		Dendrothele	9	0	0	7	0	0	3	0	0	3	0	1	4	4	3	16	13	6	1	0	1	0	0	0	0	0	0	0	0	3	1	0	0	1	1	0	0	2	0	0	1
Mychae1	97	Wood saprotroph	Mycena haematopus	Basidiomycota	Agaricomycetes	Agaricales	Mycenaceae	Mycena	26	1	1	3	1	1	0	0	1	2	1	0	3	1	0	5	20	5	0	0	0	0	0	0	0	0	0	0	0	3	0	0	0	1	0	4	0	0	0	0	1
Mycsan1	98	Litter saprotroph	Mycena sanguinolenta	Basidiomycota	Agaricomycetes	Agaricales	Mycenaceae	Mycena	34	5	0	6	0	1	1	0	1	2	1	0	2	5	2	6	22	6	0	0	0	0	0	0	0	1	0	0	1	6	1	0	0	1	1	25	0	0	0	1	1
Mycgal1	99	Litter saprotroph	Mycena galopus	Basidiomycota	Agaricomycetes	Agaricales	Mycenaceae	Mycena	59	4	1	2	1	1	3	0	0	2	1	0	0	8	1	4	20	9	0	0	0	0	0	0	0	1	0	0	0	6	1	0	0	1	0	15	0	0	0	2	1
Mycalb1	100	Grass saprotroph	Mycena albidolilacea	Basidiomycota	Agaricomycetes	Agaricales	Mycenaceae	Mycena	36	1	0	5	0	0	1	0	1	4	1	2	7	6	4	8	33	8	0	0	0	0	0	0	0	0	0	0	0	5	1	0	0	1	1	11	0	0	0	2	1
Mycoli1	101	Grass saprotroph	Mycena olivaceomarginata	Basidiomycota	Agaricomycetes	Agaricales	Mycenaceae	Mycena	57	1	0	5	1	0	1	0	2	2	2	1	11	8	4	7	47	8	0	1	0	0	0	0	0	0	1	0	4	5	4	0	0	2	0	25	0	0	0	1	1
Favcal1_2	102	Wood saprotroph	Favolaschia claudopus	Basidiomycota	Agaricomycetes	Agaricales	Mycenaceae	Favolaschia	24	0	0	5	17	0	2	0	0	4	0	5	7	1	5	4	19	11	0	0	0	0	0	0	1	2	0	0	1	0	0	0	0	0	4	14	0	1	0	0	0
Mycvit1	103	Litter saprotroph	Mycena vitilis	Basidiomycota	Agaricomycetes	Agaricales	Mycenaceae	Mycena	31	4	1	6	1	0	1	0	1	2	0	0	7	2	2	5	13	4	0	0	0	0	0	0	0	0	0	0	1	2	1	0	0	1	0	8	0	0	0	1	0
Mycpol1	104	Wood saprotroph	Mycena polygramma	Basidiomycota	Agaricomycetes	Agaricales	Mycenaceae	Mycena	36	4	2	5	0	0	1	0	0	1	0	0	5	6	2	9	22	5	0	0	0	0	0	0	0	0	0	0	0	2	0	0	0	1	1	12	0	0	0	3	0
Mycrub1	105	Litter saprotroph	Mycena capillaripes	Basidiomycota	Agaricomycetes	Agaricales	Mycenaceae	Mycena	44	1	1	6	1	1	1	0	2	4	0	1	7	6	3	9	40	11	0	0	0	0	0	0	0	1	0	0	2	3	0	0	0	1	1	16	0	0	0	1	1
Myclep1	106	Litter saprotroph	Mycena leptocephala	Basidiomycota	Agaricomycetes	Agaricales	Mycenaceae	Mycena	51	2	1	5	1	0	1	0	3	5	1	3	13	6	1	17	37	7	0	0	0	0	0	0	0	0	0	0	1	6	1	0	0	1	2	19	0	0	0	1	0
Mycmet1	107	Litter saprotroph	Mycena metata	Basidiomycota	Agaricomycetes	Agaricales	Mycenaceae	Mycena	43	0	0	7	1	1	1	0	1	3	1	0	2	5	1	5	39	3	0	0	0	0	0	0	0	0	0	0	0	9	0	0	0	2	3	17	0	0	0	0	4
Mycale1	108	Litter saprotroph	Mycena alexandri	Basidiomycota	Agaricomycetes	Agaricales	Mycenaceae	Mycena	37	2	0	2	2	0	1	0	0	3	1	0	8	5	1	3	31	6	0	0	0	0	0	0	0	0	0	0	2	2	0	0	0	1	1	8	0	0	0	0	1
Mycfil1	109	Litter saprotroph	Mycena filopes	Basidiomycota	Agaricomycetes	Agaricales	Mycenaceae	Mycena	40	0	2	5	1	1	1	0	1	2	1	0	13	5	2	9	24	3	0	0	0	0	0	0	0	0	0	0	1	3	0	0	0	0	0	12	0	0	0	0	2
Mycbel1	110	Grass saprotroph	Mycena belliae	Basidiomycota	Agaricomycetes	Agaricales	Mycenaceae	Mycena	17	0	1	2	0	0	1	0	1	7	0	1	3	3	5	13	11	3	0	0	0	0	0	0	0	0	0	0	3	1	1	0	0	1	1	6	0	0	0	0	0
Myclat1	111	Grass saprotroph	Mycena latifolia	Basidiomycota	Agaricomycetes	Agaricales	Mycenaceae	Mycena	36	1	1	6	0	0	1	0	1	6	1	2	8	12	4	21	25	7	0	0	0	0	0	0	0	1	0	0	3	2	1	0	0	2	0	16	0	0	0	2	1
Mycros1	112	Litter saprotroph	Mycena rosella	Basidiomycota	Agaricomycetes	Agaricales	Mycenaceae	Mycena	30	1	1	6	1	0	0	0	0	2	0	0	8	5	10	4	24	6	0	0	0	0	0	0	0	0	0	0	0	4	0	0	0	0	2	14	0	0	0	1	0
Mycvul1	113	Litter saprotroph	Mycena vulgaris	Basidiomycota	Agaricomycetes	Agaricales	Mycenaceae	Mycena	33	0	1	6	0	1	2	0	3	6	1	2	14	3	10	8	22	6	0	0	0	0	0	0	0	0	0	0	1	7	0	0	0	1	2	14	0	0	0	4	1
Mycepi1	114	Litter saprotroph	Mycena epipterygia	Basidiomycota	Agaricomycetes	Agaricales	Mycenaceae	Mycena	40	1	2	2	1	1	1	0	1	3	0	0	3	6	2	6	30	7	0	0	0	0	0	0	0	0	0	0	0	5	1	0	0	1	1	16	0	0	0	0	1
Myccro1	115	Litter saprotroph	Mycena crocata	Basidiomycota	Agaricomycetes	Agaricales	Mycenaceae	Mycena	25	0	0	5	1	0	2	0	2	2	1	0	12	2	8	10	17	4	1	0	0	0	0	0	0	0	0	0	4	1	1	0	0	1	2	8	0	0	0	2	1
Mycgale1	116	Wood saprotroph	Mycena galericulata	Basidiomycota	Agaricomycetes	Agaricales	Mycenaceae	Mycena	48	1	1	5	1	1	5	0	2	3	0	0	1	0	0	25	25	7	0	0	0	0	0	0	0	0	0	0	0	3	0	0	0	2	0	12	0	0	0	0	0
Mycmac1	117	Wood saprotroph	Mycena maculata	Basidiomycota	Agaricomycetes	Agaricales	Mycenaceae	Mycena	30	2	1	4	0	0	1	0	0	3	1	0	1	3	1	11	18	1	0	0	0	0	0	0	0	0	0	0	1	4	0	0	0	1	0	4	0	0	0	1	0
Mycreb1	118	Litter saprotroph	Mycena rebaudengoi	Basidiomycota	Agaricomycetes	Agaricales	Mycenaceae	Mycena	29	2	2	2	0	1	2	0	3	7	0	1	17	8	11	35	42	9	4	0	0	0	0	0	0	1	1	0	1	4	2	0	0	1	1	13	0	0	0	0	0
Myc59_1	119	Litter saprotroph	Mycena sp.	Basidiomycota	Agaricomycetes	Agaricales	Mycenaceae	Mycena	22	0	0	3	0	1	0	0	1	3	0	0	4	5	2	10	19	2	0	0	0	0	0	0	0	0	0	0	1	3	0	0	0	1	1	6	0	0	0	2	1
Mycami1	120	Wood saprotroph	Mycena amicta	Basidiomycota	Agaricomycetes	Agaricales	Mycenaceae	Mycena	33	1	0	6	0	2	3	0	2	4	1	2	2	2	2	4	24	3	0	0	0	0	0	0	0	0	0	0	1	4	0	0	0	1	2	7	0	0	0	0	1
Mycpur1	121	Grass saprotroph	Mycena pura	Basidiomycota	Agaricomycetes	Agaricales	Mycenaceae	Mycena	23	1	1	3	0	1	1	0	1	1	0	0	0	4	1	5	19	2	0	0	0	0	0	0	0	1	0	0	1	5	0	0	0	1	0	7	0	0	0	0	2
Rorror1	122	Litter saprotroph	Roridomyces roridus	Basidiomycota	Agaricomycetes	Agaricales	Mycenaceae	Roridomyces	31	4	1	4	0	0	1	0	0	5	1	0	1	2	1	10	22	8	0	0	0	0	0	0	0	2	0	0	0	4	0	0	0	1	0	14	0	0	0	3	0
[truncated: 65 more columns]

## Sheet: Protease total
Table S5 - The count of total proteases
JGI_ID	CladeOrder	Ecology	SpeciesName	Phylum	Class	Order	Family	Genus	A01A	A01X	A02A	A02C	A03A	A08	A22B	A24A	A28A	A28B	C01B	C02A	C03B	C04	C110	C111	C115	C11X	C12	C13	C14A	C14B	C19	C26	C39	C44	C45	C46	C48	C50	C54	C56	C64	C65	C67	C78A	C78X	C82A	C83	C89	C95
Phocon1	1	Wood saprotroph	Pholiota conissans	Basidiomycota	Agaricomycetes	Agaricales	Strophariaceae	Pholiota	24	0	5	1	1	1	1	1	2	0	1	5	3	1	9	2	6	2	4	1	4	20	17	7	5	1	8	2	4	1	2	10	2	1	2	1	3	0	1	3	4
Phosp1	2	Wood saprotroph	Pholiota sp.	Basidiomycota	Agaricomycetes	Agaricales	Strophariaceae	Pholiota	25	0	5	0	1	1	2	1	1	0	1	6	6	1	7	1	6	2	5	1	5	19	18	7	4	1	7	3	6	1	2	13	2	1	2	1	3	1	1	3	3
Phohig1	3	Soil saprotroph	Pholiota molesta	Basidiomycota	Agaricomycetes	Agaricales	Strophariaceae	Pholiota	24	0	6	0	1	1	1	2	0	0	1	12	2	2	8	2	6	3	6	2	1	20	17	6	5	1	7	3	9	1	1	16	5	2	2	1	2	1	0	3	4
Hypsu1	4	Wood saprotroph	Hypholoma sublateritium	Basidiomycota	Agaricomycetes	Agaricales	Strophariaceae	Hypholoma	24	0	7	0	1	1	1	0	3	1	1	6	3	2	9	3	11	2	5	1	1	31	15	6	5	1	8	2	9	1	2	10	3	1	2	0	0	0	1	3	4
Phoaln1	5	Soil saprotroph	Pholiota alnicola	Basidiomycota	Agaricomycetes	Agaricales	Strophariaceae	Flammula	19	0	6	0	1	1	1	0	2	0	1	4	5	1	9	3	8	2	4	1	1	30	16	7	7	1	7	4	6	1	2	6	3	1	2	1	3	1	1	4	4
Hebvel2	6	Ectomycorrhiza	Hebeloma brunneifolium	Basidiomycota	Agaricomycetes	Agaricales	Hymenogastraceae	Hebeloma	28	0	5	0	0	1	1	0	0	0	1	9	3	1	7	3	9	2	3	1	3	44	19	7	3	1	8	2	7	1	1	4	2	1	2	1	3	3	0	4	4
Hebcy2	7	Ectomycorrhiza	Hebeloma cylindrosporum	Basidiomycota	Agaricomycetes	Agaricales	Hymenogastraceae	Hebeloma	16	0	5	0	1	1	1	0	2	0	1	5	2	1	6	3	9	2	3	1	1	15	16	7	4	1	7	3	8	1	1	6	4	1	2	0	0	1	0	4	4
Psicub1_1	8	Grass saprotroph	Psilocybe cubensis	Basidiomycota	Agaricomycetes	Agaricales	Strophariaceae	Psilocybe	25	0	6	0	1	2	1	0	0	0	1	5	4	1	14	3	8	2	4	1	1	10	16	7	2	1	6	2	3	1	1	13	2	1	3	1	3	0	1	4	4
Psiser1	9	Litter saprotroph	Psilocybe serbica	Basidiomycota	Agaricomycetes	Agaricales	Strophariaceae	Psilocybe	28	1	5	0	1	1	1	0	3	0	1	5	5	1	14	3	10	2	4	1	1	33	16	7	3	1	11	2	3	1	1	9	3	1	2	0	0	3	0	4	4
Agrped1	10	Grass saprotroph	Agrocybe pediades	Basidiomycota	Agaricomycetes	Agaricales	Strophariaceae	Agrocybe	22	2	6	1	1	1	1	1	3	1	1	4	5	1	15	3	9	3	3	1	1	7	15	5	4	1	9	2	3	5	7	17	2	1	2	1	3	2	2	4	5
Agrpra2	11	Litter saprotroph	Agrocybe praecox	Basidiomycota	Agaricomycetes	Agaricales	Strophariaceae	Agrocybe	18	1	5	0	1	1	1	0	0	0	1	4	4	1	10	4	9	2	3	1	2	9	16	7	3	1	7	2	2	1	1	12	4	1	2	0	0	1	0	3	4
Gymch1	12	Wood saprotroph	Gymnopilus chrysopellus	Basidiomycota	Agaricomycetes	Agaricales	Hymenogastraceae	Gymnopilus	28	0	6	1	1	1	1	1	2	0	1	4	4	1	9	2	6	4	5	1	2	20	20	7	5	1	8	4	14	1	1	5	2	1	2	1	3	0	1	4	5
Gymjun1	13	Wood saprotroph	Gymnopilus junonius	Basidiomycota	Agaricomycetes	Agaricales	Hymenogastraceae	Gymnopilus	28	0	5	0	1	2	1	0	0	0	1	4	3	1	10	2	10	5	5	1	2	18	18	8	4	1	7	4	5	1	1	6	2	1	2	1	3	1	0	3	4
Galma1	14	Wood saprotroph	Galerina marginata	Basidiomycota	Agaricomycetes	Agaricales	Strophariaceae	Galerina	28	0	6	0	1	1	1	0	6	0	1	6	2	1	6	3	17	3	6	1	1	36	22	6	8	1	12	3	4	1	1	9	4	1	2	0	0	2	0	4	4
Crafun1	15	Soil saprotroph	Crassisporium funariophilum	Basidiomycota	Agaricomycetes	Agaricales	Crassisporiaceae	Crassisporium	20	0	6	0	1	1	1	0	0	0	1	4	4	1	8	2	8	2	3	1	1	11	16	7	1	1	7	4	7	1	1	7	4	1	2	1	3	0	0	4	4
Corgl3	16	Ectomycorrhiza	Phlegmacium glaucopus	Basidiomycota	Agaricomycetes	Agaricales	Cortinariaceae	Phlegmacium	23	0	6	8	1	2	1	0	7	0	1	16	4	1	6	2	7	2	3	1	1	22	14	10	3	1	6	3	11	1	1	7	4	1	2	1	3	1	0	4	4
Crevar1	17	Wood saprotroph	Crepidotus variabilis	Basidiomycota	Agaricomycetes	Agaricales	Crepidotaceae	Crepidotus	17	0	6	0	1	2	1	1	0	1	1	7	2	1	12	3	9	6	4	1	3	9	17	7	2	1	6	2	6	1	1	12	2	1	2	1	3	0	1	4	4
Creces1	18	Wood saprotroph	Crepidotus cesatii	Basidiomycota	Agaricomycetes	Agaricales	Crepidotaceae	Crepidotus	14	1	5	0	1	1	1	1	1	0	2	5	4	1	14	4	7	3	4	1	3	7	17	7	2	1	6	2	9	1	1	7	2	1	2	1	3	0	1	3	4
Inolan1	19	Wood saprotroph	Inosperma lanatodiscum	Basidiomycota	Agaricomycetes	Agaricales	Inocybaceae	Inosperma	32	0	4	0	1	2	0	0	1	0	1	8	1	1	4	2	7	0	1	1	1	9	21	8	3	1	4	2	6	1	4	6	3	1	2	1	3	0	0	3	1
Phapla1	20	Wood saprotroph	Phaeosolenia platensis	Basidiomycota	Agaricomycetes	Agaricales	Chromocyphellaceae	Phaeosolenia	14	1	6	0	1	2	1	1	1	0	1	6	2	1	12	2	7	1	3	1	1	27	16	7	3	1	5	2	2	1	1	13	4	2	2	1	3	0	1	3	6
Panpap1	21	Grass saprotroph	Panaeolus papilionaceus	Basidiomycota	Agaricomycetes	Agaricales	Galeropsidaceae	Panaeolus	15	1	6	0	1	1	1	1	0	3	1	5	3	1	10	2	7	2	3	1	1	5	17	7	6	1	9	4	7	1	1	14	2	1	2	1	3	2	0	3	4
Conapa1	22	Grass saprotroph	Conocybe apala	Basidiomycota	Agaricomycetes	Agaricales	Bolbitiaceae	Conocybe	20	2	9	0	0	1	1	1	0	0	1	4	3	1	11	3	11	1	5	1	1	7	18	9	1	1	12	3	2	1	1	14	5	1	2	1	3	1	0	4	4
Bolvit1	23	Grass saprotroph	Bolbitius vitellinus	Basidiomycota	Agaricomycetes	Agaricales	Bolbitiaceae	Bolbitius	17	1	7	0	1	2	0	1	0	0	1	4	4	1	10	2	4	1	4	1	0	8	18	7	4	1	7	3	3	1	1	12	2	1	2	1	3	1	0	1	5
Copci1	24	Litter saprotroph	Coprinopsis cinerea	Basidiomycota	Agaricomycetes	Agaricales	Psathyrellaceae	Coprinopsis	10	5	7	0	1	1	0	0	1	0	1	9	3	1	9	2	9	1	4	1	1	13	16	7	3	1	5	2	7	1	1	8	3	1	2	0	0	0	0	4	4
Copscl1	25	Grass saprotroph	Coprinopsis sclerotiger	Basidiomycota	Agaricomycetes	Agaricales	Psathyrellaceae	Coprinopsis	10	1	6	0	1	1	1	0	0	0	1	6	6	1	5	2	6	1	4	1	1	12	15	7	4	0	5	2	2	1	1	8	2	1	2	1	3	1	1	4	4
Copmar1	26	Grass saprotroph	Coprinopsis marcescibilis	Basidiomycota	Agaricomycetes	Agaricales	Psathyrellaceae	Coprinopsis	12	5	11	0	0	2	1	1	6	0	1	6	4	1	16	2	8	2	4	1	1	21	15	7	2	1	4	4	10	1	1	8	2	2	2	1	3	2	0	4	4
Coppel1	27	Grass saprotroph	Coprinellus pellucidus	Basidiomycota	Agaricomycetes	Agaricales	Psathyrellaceae	Coprinellus	10	1	8	0	1	1	2	0	1	2	1	9	4	1	7	2	7	1	5	1	2	17	15	7	5	1	5	3	16	1	1	5	4	1	2	1	3	2	0	3	4
Copang1	28	Litter saprotroph	Coprinellus angulatus	Basidiomycota	Agaricomycetes	Agaricales	Psathyrellaceae	Tulosesus	14	6	8	0	0	2	1	0	4	3	1	15	3	1	22	6	8	3	6	1	4	21	23	8	5	1	6	3	12	1	1	31	3	1	2	1	3	1	0	5	3
Copmic2	29	Litter saprotroph	Coprinellus micaceus	Basidiomycota	Agaricomycetes	Agaricales	Psathyrellaceae	Coprinellus	10	3	7	0	1	1	2	0	0	1	1	8	4	1	14	6	13	1	6	1	4	11	18	9	4	1	7	4	12	1	1	9	3	1	2	0	0	0	1	4	5
Lacam2	30	Ectomycorrhiza	Laccaria amethystina	Basidiomycota	Agaricomycetes	Agaricales	Hydnangiaceae	Laccaria	23	0	8	0	2	1	1	0	0	0	2	5	3	1	4	2	5	1	4	1	1	15	20	7	3	1	2	3	5	1	1	7	3	1	2	2	6	1	1	4	4
Lacbi2	31	Ectomycorrhiza	Laccaria bicolor	Basidiomycota	Agaricomycetes	Agaricales	Hydnangiaceae	Laccaria	21	2	7	7	1	2	1	0	1	0	3	8	4	2	4	2	7	1	4	1	1	16	16	7	5	1	2	4	9	7	1	5	2	1	2	1	4	1	0	4	4
Cyapal1	32	Wood saprotroph	Cyathus pallidus	Basidiomycota	Agaricomycetes	Agaricales	Nidulariaceae	Cyathus	58	1	5	0	1	2	1	2	0	0	2	12	4	3	8	2	10	6	7	1	3	13	20	6	2	1	9	4	7	1	1	29	5	1	1	1	3	3	0	8	2
Cyaste1	33	Grass saprotroph	Cyathus stercoreus	Basidiomycota	Agaricomycetes	Agaricales	Nidulariaceae	Cyathus	62	1	5	0	0	2	1	1	2	0	1	5	4	1	7	2	11	3	5	1	2	19	12	6	3	1	6	1	10	3	1	27	5	1	2	1	3	4	0	6	3
Cyastr2	34	Wood saprotroph	Cyathus striatus	Basidiomycota	Agaricomycetes	Agaricales	Nidulariaceae	Cyathus	35	1	7	0	1	1	1	1	1	2	1	8	4	1	8	2	12	3	5	2	3	7	16	7	7	1	7	2	4	1	1	11	5	1	2	1	3	2	0	4	4
Mycden1	35	Wood saprotroph	Mycocalia denudata	Basidiomycota	Agaricomycetes	Agaricales	Nidulariaceae	Mycocalia	22	1	7	0	1	2	1	1	1	0	1	3	3	1	9	2	7	5	4	1	2	5	17	6	4	1	4	3	10	1	1	6	3	1	2	1	3	1	0	4	4
Nidsp1	36	Wood saprotroph	Nidula sp.	Basidiomycota	Agaricomycetes	Agaricales	Nidulariaceae	Nidula	24	1	5	0	1	1	1	0	0	0	1	4	4	1	8	2	7	5	4	1	1	21	15	5	2	1	6	3	2	1	1	7	4	1	1	1	1	1	1	4	3
Crula1	37	Wood saprotroph	Crucibulum laeve	Basidiomycota	Agaricomycetes	Agaricales	Nidulariaceae	Crucibulum	21	1	7	0	1	1	1	0	0	0	1	4	5	1	10	3	11	3	4	1	2	13	19	7	5	1	8	4	2	1	1	7	5	1	2	0	0	1	1	3	4
Agabi_varbisH97_2	38	Grass saprotroph	Agaricus bisporus H97	Basidiomycota	Agaricomycetes	Agaricales	Agaricaceae	Agaricus	14	1	4	2	0	1	1	0	5	5	1	2	4	1	6	2	10	3	4	1	1	8	16	10	6	1	5	3	2	1	1	7	4	1	1	1	3	1	1	1	2
Agabi_varbur_1	39	Grass saprotroph	Agaricus bisporus	Basidiomycota	Agaricomycetes	Agaricales	Agaricaceae	Agaricus	14	1	6	1	1	1	1	1	4	11	1	2	4	1	7	2	11	4	4	1	1	8	15	10	3	1	5	4	2	1	1	7	4	1	2	1	3	1	1	2	5
Agasi1	40	Grass saprotroph	Agaricus sinodeliciosus	Basidiomycota	Agaricomycetes	Agaricales	Agaricaceae	Agaricus	14	1	6	0	1	1	1	1	1	0	1	2	5	1	5	2	7	3	4	1	1	5	15	10	2	1	6	3	2	1	1	5	4	1	2	1	3	1	0	2	5
Macfu1	41	Litter saprotroph	Macrolepiota fuliginosa	Basidiomycota	Agaricomycetes	Agaricales	Agaricaceae	Macrolepiota	21	0	5	5	1	2	1	0	7	2	1	3	3	1	17	2	9	2	4	1	1	10	16	9	5	1	7	3	3	1	2	4	3	1	2	1	2	4	0	4	4
Lycper1	42	Litter saprotroph	Lycoperdon perlatum	Basidiomycota	Agaricomycetes	Agaricales	Lycoperdaceae	Lycoperdon	17	1	7	0	1	2	1	0	3	1	1	4	5	1	14	4	10	2	3	1	1	5	17	6	3	1	10	3	2	1	2	5	4	1	2	0	0	0	0	2	4
Amaapr1	43	Ectomycorrhiza	Amanita muscaria	Basidiomycota	Agaricomycetes	Agaricales	Amanitaceae	Amanita	33	0	13	0	1	1	0	0	0	0	1	1	8	1	8	2	7	2	2	1	0	4	19	7	1	1	6	2	12	1	1	3	4	1	2	1	3	1	0	3	4
Amamu1	44	Ectomycorrhiza	Amanita muscaria Koide	Basidiomycota	Agaricomycetes	Agaricales	Amanitaceae	Amanita	31	0	9	0	1	1	0	0	4	2	1	1	4	1	8	4	12	2	2	1	0	2	16	7	1	1	5	2	10	1	1	3	4	1	2	0	0	1	0	4	4
Amarub1	45	Ectomycorrhiza	Amanita rubescens	Basidiomycota	Agaricomycetes	Agaricales	Amanitaceae	Amanita	31	0	8	0	1	1	0	0	1	0	1	1	3	3	9	3	12	1	2	1	0	7	25	7	4	1	4	1	5	1	1	3	3	1	2	0	0	2	1	6	5
Amath1	46	Ectomycorrhiza	Amanita thiersii	Basidiomycota	Agaricomycetes	Agaricales	Amanitaceae	Amanita	15	0	7	0	1	1	0	0	0	1	1	1	4	1	13	3	11	3	3	1	0	3	14	8	1	1	7	2	2	1	1	3	3	1	2	0	0	1	1	2	4
Trima3	47	Ectomycorrhiza	Tricholoma matsutake	Basidiomycota	Agaricomycetes	Agaricales	Tricholomataceae	Tricholoma	15	0	7	0	1	1	1	0	7	5	1	3	4	1	6	4	10	4	5	1	0	2	15	7	6	1	6	2	11	1	1	3	2	1	2	0	0	1	0	3	5
Tripop1	48	Ectomycorrhiza	Tricholoma populinum	Basidiomycota	Agaricomycetes	Agaricales	Tricholomataceae	Tricholoma	21	0	7	0	1	2	1	1	0	0	1	6	3	1	7	2	8	2	4	1	0	11	16	7	5	1	5	2	5	3	2	3	1	1	1	1	3	1	0	3	4
Lepnud1	49	Litter saprotroph	Lepista nuda	Basidiomycota	Agaricomycetes	Agaricales	Clitocybaceae	Collybia	14	1	7	0	1	2	1	1	1	2	1	5	5	1	16	3	10	4	4	1	1	6	17	8	6	1	11	2	6	1	1	7	4	1	2	1	3	1	0	3	5
Lyoat1	50	Soil saprotroph	Lyophyllum atratum	Basidiomycota	Agaricomycetes	Agaricales	Lyophyllaceae	Lyophyllum	25	0	7	0	1	3	1	1	1	0	1	4	4	1	8	3	7	3	5	1	2	6	17	8	7	1	8	4	5	1	4	6	3	1	2	2	3	3	1	3	4
TerJ132_1	51	Grass saprotroph	Termitomyces sp.	Basidiomycota	Agaricomycetes	Agaricales	Lyophyllaceae	Termitomyces	18	0	8	5	1	1	1	1	12	0	1	3	2	1	6	2	9	3	2	1	0	3	15	5	3	0	6	3	3	1	2	4	4	1	2	1	3	1	0	3	4
Hypma1	52	Wood saprotroph	Hypsizygus marmoreus	Basidiomycota	Agaricomycetes	Agaricales	Lyophyllaceae	Hypsizygus	21	1	6	11	1	1	1	1	2	1	1	4	5	1	6	3	8	2	3	1	1	6	15	7	3	1	6	3	8	1	1	5	4	1	2	1	3	1	0	4	4
Cligib1	53	Litter saprotroph	Clitocybe gibba	Basidiomycota	Agaricomycetes	Agaricales		Infundibulicybe	58	0	8	0	1	1	1	0	1	1	1	5	4	1	13	4	8	1	3	1	1	11	19	7	1	1	9	3	7	1	1	1	5	1	2	1	3	1	0	3	4
Plucer1	54	Wood saprotroph	Pluteus cervinus	Basidiomycota	Agaricomycetes	Agaricales	Pluteaceae	Pluteus	22	0	6	0	1	1	1	0	3	2	1	4	3	1	7	2	11	1	2	1	1	6	17	7	5	1	16	3	14	1	0	6	4	1	2	0	0	0	0	4	5
Volvo1	55	Grass saprotroph	Volvariella volvacea	Basidiomycota	Agaricomycetes	Agaricales	Pluteaceae	Volvariella	18	1	7	0	1	1	1	0	3	1	1	3	4	1	5	3	5	1	2	1	1	2	12	7	4	1	6	1	2	1	1	7	4	1	2	0	0	0	0	3	5
Radcon1	56	Wood saprotroph	Radulomyces confluens	Basidiomycota	Agaricomycetes	Agaricales	Radulomycetaceae	Radulomyces	38	0	6	0	1	1	1	0	0	3	1	1	3	1	14	2	6	4	5	1	0	4	15	7	2	1	11	2	5	1	1	2	2	1	2	1	3	2	1	3	4
Aphpse1	57	Wood saprotroph	Aphanobasidium pseudotsugae	Basidiomycota	Agaricomycetes	Agaricales	Radulomycetaceae	Aphanobasidium	27	0	5	0	1	1	1	0	1	0	3	1	5	1	5	4	7	3	3	1	0	3	13	7	4	1	7	2	2	1	1	2	4	1	2	1	3	1	0	2	3
Ptegra1	58	Grass saprotroph	Pterula gracilis	Basidiomycota	Agaricomycetes	Agaricales	Pterulaceae	Pterula	16	0	6	0	1	1	1	0	0	0	1	1	3	1	11	3	9	1	4	1	0	5	17	7	4	1	5	2	2	1	1	10	5	1	2	0	0	1	1	3	3
Hygcoc2	59	Grass saprotroph	Hygrocybe coccinea	Basidiomycota	Agaricomycetes	Agaricales	Hygrophoraceae	Hygrocybe	40	0	6	0	1	1	1	1	1	0	0	2	3	1	4	2	14	1	7	2	0	13	24	6	4	1	1	2	33	2	2	8	0	2	2	1	3	0	0	4	2
Crison1	60	Pathogen	Cristinia sonorae	Basidiomycota	Agaricomycetes	Agaricales	Stephanosporaceae	Cristinia	47	2	7	0	1	2	1	0	0	1	1	3	3	1	4	2	7	8	6	1	0	6	16	8	3	1	8	2	2	1	1	7	2	2	2	1	3	1	0	3	3
PleosPC9_1	61	Wood saprotroph	Pleurotus ostreatus	Basidiomycota	Agaricomycetes	Agaricales	Pleurotaceae	Pleurotus	25	0	7	1	1	1	1	0	2	0	1	2	5	1	9	2	10	1	3	1	0	8	17	7	5	1	8	2	1	1	1	6	2	1	2	1	3	1	0	4	4
Pleery1	62	Wood saprotroph	Pleurotus eryngii	Basidiomycota	Agaricomycetes	Agaricales	Pleurotaceae	Pleurotus	25	0	6	0	1	1	1	1	0	1	1	2	4	1	10	2	8	1	3	1	0	10	15	7	3	1	7	2	7	1	1	7	2	1	2	1	2	1	1	4	3
Armga1	63	Wood saprotroph	Armillaria gallica	Basidiomycota	Agaricomycetes	Agaricales	Physalacriaceae	Armillaria	33	0	9	0	1	3	1	0	4	0	1	4	7	1	22	4	9	1	11	1	15	137	20	8	10	1	20	3	5	1	1	8	2	1	3	0	0	5	1	3	4
Armcep1	64	Wood saprotroph	Armillaria cepistipes	Basidiomycota	Agaricomycetes	Agaricales	Physalacriaceae	Armillaria	29	0	7	2	1	2	1	0	20	5	0	2	7	1	22	4	7	1	7	0	10	94	15	8	5	1	17	3	12	1	1	8	2	1	2	0	0	2	0	3	5
Armnab1	65	Wood saprotroph	Armillaria nabsnona	Basidiomycota	Agaricomycetes	Agaricales	Physalacriaceae	Armillaria	30	0	7	0	1	4	1	1	1	0	1	2	7	1	27	3	6	1	5	1	10	112	19	7	9	1	19	3	5	1	1	8	2	1	3	1	3	1	0	3	4
Armost1	66	Pathogen	Armillaria ostoyae	Basidiomycota	Agaricomycetes	Agaricales	Physalacriaceae	Armillaria	29	0	8	0	1	4	1	1	0	0	1	2	7	1	21	4	8	1	5	1	8	90	16	7	13	1	14	3	6	1	1	8	2	1	3	1	3	2	0	3	4
Armosto1	67	Wood saprotroph	Armillaria solidipes	Basidiomycota	Agaricomycetes	Agaricales	Physalacriaceae	Armillaria	28	0	6	225	1	3	1	0	33	1	1	2	6	1	19	4	6	1	5	1	8	76	14	7	5	1	17	3	3	1	1	6	2	1	1	1	2	2	0	3	5
Armbor1	68	Wood saprotroph	Armillaria borealis	Basidiomycota	Agaricomycetes	Agaricales	Physalacriaceae	Armillaria	31	0	8	0	1	3	1	1	1	0	1	2	9	1	22	3	7	1	9	1	10	87	16	7	10	1	15	3	3	1	1	7	2	1	1	1	3	4	1	3	4
Armfum1	69	Wood saprotroph	Armillaria fumosa	Basidiomycota	Agaricomycetes	Agaricales	Physalacriaceae	Armillaria	30	0	8	0	1	1	1	1	1	2	1	2	7	1	15	3	7	1	5	1	6	69	16	8	6	1	12	3	3	1	1	6	2	1	2	1	3	1	0	3	4
Armlut1	70	Litter saprotroph	Armillaria luteobubalina	Basidiomycota	Agaricomycetes	Agaricales	Physalacriaceae	Armillaria	40	0	7	0	1	1	1	1	0	0	1	3	9	1	18	3	7	1	5	1	6	111	16	8	5	1	18	3	6	1	1	7	3	1	3	1	3	4	0	3	5
Armnov1	71	Pathogen	Armillaria novae-zelandiae	Basidiomycota	Agaricomycetes	Agaricales	Physalacriaceae	Armillaria	31	0	7	0	1	1	1	1	0	0	1	3	8	1	17	3	10	1	5	1	7	98	19	7	8	1	15	4	2	1	2	4	2	1	2	1	3	4	0	3	5
Armme1_1	72	Pathogen	Armillaria mellea	Basidiomycota	Agaricomycetes	Agaricales	Physalacriaceae	Armillaria	23	0	6	70	1	1	0	1	9	1	1	2	5	1	16	3	7	1	5	0	5	55	15	6	6	1	10	1	4	1	1	4	2	0	2	1	2	2	0	3	5
Armect1	73	Litter saprotroph	Armillaria ectypa	Basidiomycota	Agaricomycetes	Agaricales	Physalacriaceae	Desarmillaria	28	0	7	0	1	1	1	0	0	0	1	3	8	1	12	3	8	1	5	1	3	34	16	7	5	1	11	3	2	1	1	4	2	1	2	1	3	1	0	3	4
Armtab1	74	Wood saprotroph	Armillaria tabescens	Basidiomycota	Agaricomycetes	Agaricales	Physalacriaceae	Desarmillaria	30	0	7	0	1	1	1	1	1	0	2	7	7	1	23	3	7	1	3	1	7	80	16	7	9	1	16	3	6	1	1	7	4	1	2	1	3	2	0	3	4
Guyne1	75	Wood saprotroph	Guyanagaster necrorhizus	Basidiomycota	Agaricomycetes	Agaricales	Physalacriaceae	Guyanagaster	21	0	7	0	1	1	1	0	1	0	1	2	6	1	17	3	7	1	5	1	1	28	16	7	5	1	7	3	1	1	1	4	2	1	2	1	3	1	1	3	4
Hymrad1	76	Wood saprotroph	Hymenopellis radicata	Basidiomycota	Agaricomycetes	Agaricales	Physalacriaceae	Hymenopellis	34	0	7	0	1	2	1	0	6	0	1	2	7	0	15	2	6	1	3	1	1	14	21	7	9	1	13	2	7	1	1	7	4	1	4	1	5	2	0	3	6
Oudmuc1	77	Wood saprotroph	Oudemansiella mucida	Basidiomycota	Agaricomycetes	Agaricales	Physalacriaceae	Mucidula	23	0	7	0	1	2	1	1	0	0	1	2	6	1	13	5	11	1	5	1	3	14	19	7	8	1	8	3	4	3	1	11	5	1	3	1	4	1	1	1	6
Cylto1	78	Wood saprotroph	Cylindrobasidium torrendii	Basidiomycota	Agaricomycetes	Agaricales	Physalacriaceae	Cylindrobasidium	18	0	7	0	1	1	1	1	1	0	1	2	6	1	15	3	9	1	3	1	1	14	15	7	5	1	6	3	3	1	2	13	2	1	1	1	4	2	0	3	4
Rhobu1	79	Litter saprotroph	Rhodocollybia butyracea	Basidiomycota	Agaricomycetes	Agaricales	Omphalotaceae	Rhodocollybia	29	0	6	0	2	1	1	0	1	0	1	1	4	1	9	3	13	3	4	1	0	17	16	8	5	1	10	3	6	1	0	6	3	1	3	1	3	7	0	3	5
Lenlat1	80	Wood saprotroph	Lentinula lateritia	Basidiomycota	Agaricomycetes	Agaricales	Omphalotaceae	Lentinula	31	0	7	0	1	1	1	1	1	0	1	2	4	1	10	2	7	2	4	1	0	5	15	7	5	1	9	3	2	1	1	4	4	1	3	1	3	2	0	3	3
Gymlu1	81	Wood saprotroph	Gymnopus luxurians	Basidiomycota	Agaricomycetes	Agaricales	Omphalotaceae	Collybiopsis	42	0	8	0	1	1	2	0	7	1	1	3	7	1	11	4	11	3	4	1	0	18	14	7	3	1	13	3	10	1	1	9	3	1	3	0	0	7	1	2	5
Gyman1	82	Litter saprotroph	Gymnopus androsaceus	Basidiomycota	Agaricomycetes	Agaricales	Omphalotaceae	Gymnopus	34	0	9	0	1	1	1	0	8	0	2	2	7	1	17	6	10	4	5	1	0	13	13	9	7	1	13	3	18	1	1	9	3	1	3	0	0	7	0	4	5
Gymear1	83	Soil saprotroph	Gymnopus earleae	Basidiomycota	Agaricomycetes	Agaricales	Omphalotaceae	Gymnopus	40	0	7	0	1	2	1	1	0	0	1	2	5	1	12	2	8	3	5	1	0	6	14	8	2	1	10	4	9	1	1	10	3	1	3	1	3	6	1	3	5
Ompol1	84	Wood saprotroph	Omphalotus olearius	Basidiomycota	Agaricomycetes	Agaricales	Omphalotaceae	Omphalotus	22	0	7	3	1	2	1	1	1	0	1	2	2	0	5	1	7	0	5	1	0	6	14	7	4	1	8	3	1	0	1	5	2	1	2	1	2	0	0	3	5
Denbi1	85	Wood saprotroph	Dendrothele bispora	Basidiomycota	Agaricomycetes	Agaricales		Dendrothele	43	0	11	3	1	1	1	0	34	13	2	9	4	2	20	5	10	1	5	1	0	21	17	7	3	1	14	4	23	1	1	15	6	1	3	1	3	2	0	3	5
Marfi1	86	Litter saprotroph	Marasmius fiardii	Basidiomycota	Agaricomycetes	Agaricales	Marasmiaceae	Marasmius	20	0	5	0	1	1	1	0	7	0	1	4	4	1	17	3	9	2	5	1	0	9	15	8	4	1	7	5	3	1	1	5	6	1	2	0	0	0	0	4	5
MroMCA2997_1	87	Pathogen	Moniliophthora roreri	Basidiomycota	Agaricomycetes	Agaricales	Marasmiaceae	Moniliophthora	23	0	7	0	1	2	1	1	0	1	1	5	3	1	9	2	9	3	5	1	0	3	16	8	5	1	8	4	3	1	1	9	5	1	2	1	3	1	1	4	5
Cysmur1	88	Pathogen	Cystostereum murrayi	Basidiomycota	Agaricomycetes	Agaricales	Cystostereaceae	Cystostereum	19	0	6	0	1	1	1	1	0	0	1	1	3	1	9	3	6	1	2	1	0	9	15	7	4	1	8	4	2	1	1	7	3	1	3	1	3	1	0	3	5
Mycflo1	89	Litter saprotroph	Mycena floridula	Basidiomycota	Agaricomycetes	Agaricales	Mycenaceae	Mycena	38	2	12	0	1	1	0	0	6	3	1	4	9	2	21	4	13	0	6	1	0	5	19	7	5	1	15	4	43	1	1	23	3	1	3	0	0	1	0	4	8
Schco_LoeD_1	90	Wood saprotroph	Schizophyllum commune	Basidiomycota	Agaricomycetes	Agaricales	Schizophyllaceae	Schizophyllum	23	0	7	3	1	2	1	0	0	1	1	2	3	1	11	4	8	0	3	1	0	8	15	7	5	1	11	3	4	1	1	10	2	1	3	1	4	1	1	3	4
Schrad1	91	Wood saprotroph	Schizophyllum radiatum	Basidiomycota	Agaricomycetes	Agaricales	Schizophyllaceae	Schizophyllum	30	0	8	1	1	4	1	0	2	0	1	3	1	1	19	6	11	0	4	1	0	16	17	10	6	2	12	5	6	1	3	10	4	1	2	1	3	1	1	2	5
Schfas1	92	Litter saprotroph	Schizophyllum fasciatum	Basidiomycota	Agaricomycetes	Agaricales	Schizophyllaceae	Schizophyllum	22	0	3	0	1	2	1	0	1	0	1	1	2	1	13	4	7	0	3	1	0	5	14	8	4	1	9	3	4	2	2	7	2	1	3	0	4	0	0	4	5
Auramp1	93	Wood saprotroph	Auriculariopsis ampla	Basidiomycota	Agaricomycetes	Agaricales	Schizophyllaceae	Auriculariopsis	22	0	6	0	1	1	1	0	1	0	1	2	2	1	10	5	11	0	3	1	0	7	17	7	3	2	9	3	5	1	2	10	1	1	3	0	0	1	1	3	5
Fishe1	94	Wood saprotroph	Fistulina hepatica	Basidiomycota	Agaricomycetes	Agaricales	Fistulinaceae	Fistulina	19	0	5	0	1	1	1	0	4	0	1	2	4	1	5	5	14	2	3	1	0	5	14	7	4	1	5	4	6	1	1	3	4	1	2	0	0	1	1	2	5
Niavib1	95	Wood saprotroph	Nia vibrissa	Basidiomycota	Agaricomycetes	Agaricales	Cyphellopsidaceae	Nia	17	0	5	0	1	1	1	1	1	0	1	1	3	1	8	2	6	2	6	1	0	6	14	7	1	1	2	3	2	1	2	5	2	1	2	1	2	1	1	2	4
Denmi1	96	Wood saprotroph	Dendrothele microspora	Basidiomycota	Agaricomycetes	Agaricales		Dendrothele	26	3	5	0	1	1	1	1	0	2	1	4	7	1	11	3	8	5	4	1	0	8	17	7	6	1	11	3	4	1	1	8	4	1	3	1	3	1	1	3	4
Mychae1	97	Wood saprotroph	Mycena haematopus	Basidiomycota	Agaricomycetes	Agaricales	Mycenaceae	Mycena	44	1	9	0	1	1	1	0	0	1	1	4	7	2	10	3	7	2	5	1	0	11	18	6	8	1	8	3	13	1	1	7	4	1	2	0	0	0	1	4	6
Mycsan1	98	Litter saprotroph	Mycena sanguinolenta	Basidiomycota	Agaricomycetes	Agaricales	Mycenaceae	Mycena	60	5	10	0	1	1	1	0	0	3	1	6	7	2	19	4	9	12	5	1	0	15	21	8	4	1	16	6	12	1	9	15	4	1	3	0	0	1	1	4	6
Mycgal1	99	Litter saprotroph	Mycena galopus	Basidiomycota	Agaricomycetes	Agaricales	Mycenaceae	Mycena	115	4	12	0	1	1	1	0	0	2	1	7	15	1	23	6	14	12	5	1	0	30	21	9	4	1	20	4	8	1	10	19	5	1	3	0	0	0	1	6	6
Mycalb1	100	Grass saprotroph	Mycena albidolilacea	Basidiomycota	Agaricomycetes	Agaricales	Mycenaceae	Mycena	77	2	12	0	1	1	1	0	0	2	1	6	12	1	28	6	10	9	6	1	0	22	26	10	4	1	16	6	17	1	6	20	5	1	3	0	0	1	1	4	7
Mycoli1	101	Grass saprotroph	Mycena olivaceomarginata	Basidiomycota	Agaricomycetes	Agaricales	Mycenaceae	Mycena	154	3	41	0	1	2	1	0	0	0	3	6	12	2	45	11	17	10	10	1	0	40	59	8	4	2	22	9	37	1	20	46	6	1	4	0	0	0	2	6	6
Favcal1_2	102	Wood saprotroph	Favolaschia claudopus	Basidiomycota	Agaricomycetes	Agaricales	Mycenaceae	Favolaschia	55	0	27	0	1	0	1	0	0	0	3	11	6	0	23	6	6	2	4	2	0	14	21	8	5	0	14	0	24	0	3	11	4	1	0	1	2	0	0	2	3
Mycvit1	103	Litter saprotroph	Mycena vitilis	Basidiomycota	Agaricomycetes	Agaricales	Mycenaceae	Mycena	64	5	7	0	1	3	1	0	0	2	2	7	12	1	19	5	8	3	5	1	0	13	19	9	6	1	13	3	5	1	5	11	3	1	4	0	0	1	1	4	6
Mycpol1	104	Wood saprotroph	Mycena polygramma	Basidiomycota	Agaricomycetes	Agaricales	Mycenaceae	Mycena	76	4	8	0	1	1	1	0	1	0	1	6	9	1	22	5	13	5	6	2	0	20	29	10	5	1	16	5	13	1	7	21	5	1	2	0	0	0	1	6	7
Mycrub1	105	Litter saprotroph	Mycena capillaripes	Basidiomycota	Agaricomycetes	Agaricales	Mycenaceae	Mycena	87	2	8	0	1	1	1	0	2	0	2	7	11	2	25	5	10	4	5	1	1	32	26	7	12	1	16	4	19	1	4	20	3	1	2	0	0	1	0	4	6
Myclep1	106	Litter saprotroph	Mycena leptocephala	Basidiomycota	Agaricomycetes	Agaricales	Mycenaceae	Mycena	133	6	35	0	1	2	1	0	0	2	1	8	19	2	28	6	21	5	5	3	0	53	32	7	7	1	22	4	39	1	26	16	8	0	2	0	0	1	1	4	6
Mycmet1	107	Litter saprotroph	Mycena metata	Basidiomycota	Agaricomycetes	Agaricales	Mycenaceae	Mycena	69	0	10	0	1	1	1	0	0	2	1	8	11	2	29	5	12	10	5	1	0	28	18	8	4	1	10	4	8	1	14	15	4	1	2	0	0	0	2	4	7
Mycale1	108	Litter saprotroph	Mycena alexandri	Basidiomycota	Agaricomycetes	Agaricales	Mycenaceae	Mycena	63	2	10	0	1	1	1	0	0	5	1	5	12	1	19	8	13	6	5	1	0	21	19	7	9	1	15	3	4	1	6	14	3	1	2	0	0	1	1	4	6
Mycfil1	109	Litter saprotroph	Mycena filopes	Basidiomycota	Agaricomycetes	Agaricales	Mycenaceae	Mycena	76	0	14	0	1	1	1	0	0	5	1	6	9	1	35	4	13	3	9	2	0	18	18	8	4	1	15	3	7	1	3	16	3	2	2	0	0	0	2	5	6
Mycbel1	110	Grass saprotroph	Mycena belliae	Basidiomycota	Agaricomycetes	Agaricales	Mycenaceae	Mycena	38	1	8	0	1	1	1	0	0	0	2	2	11	1	15	3	9	1	4	1	0	10	19	7	2	1	8	4	7	1	2	13	3	1	3	0	0	1	1	3	6
Myclat1	111	Grass saprotroph	Mycena latifolia	Basidiomycota	Agaricomycetes	Agaricales	Mycenaceae	Mycena	88	2	8	0	1	3	1	0	0	1	1	6	11	1	36	4	12	7	7	3	0	29	22	8	4	1	19	3	10	1	3	17	4	1	3	0	0	2	1	4	6
Mycros1	112	Litter saprotroph	Mycena rosella	Basidiomycota	Agaricomycetes	Agaricales	Mycenaceae	Mycena	66	2	7	0	1	1	1	0	1	2	1	8	12	1	25	5	10	2	6	1	0	19	17	7	7	1	11	3	12	1	17	14	3	1	2	0	0	1	1	4	11
Mycvul1	113	Litter saprotroph	Mycena vulgaris	Basidiomycota	Agaricomycetes	Agaricales	Mycenaceae	Mycena	70	2	7	0	1	1	1	0	0	1	1	4	11	1	32	7	13	7	6	1	1	30	36	7	6	1	13	3	19	1	29	15	4	1	2	0	0	1	1	4	6
Mycepi1	114	Litter saprotroph	Mycena epipterygia	Basidiomycota	Agaricomycetes	Agaricales	Mycenaceae	Mycena	86	2	9	0	1	1	1	0	0	1	1	7	10	1	24	6	10	7	6	2	0	43	20	7	7	1	11	7	11	1	8	29	4	1	2	0	0	0	1	4	6
Myccro1	115	Litter saprotroph	Mycena crocata	Basidiomycota	Agaricomycetes	Agaricales	Mycenaceae	Mycena	59	1	12	0	0	1	1	0	1	4	1	7	10	1	27	4	7	3	7	3	0	15	17	7	3	1	12	3	15	1	4	15	6	1	3	0	0	1	1	4	6
Mycgale1	116	Wood saprotroph	Mycena galericulata	Basidiomycota	Agaricomycetes	Agaricales	Mycenaceae	Mycena	85	4	13	0	1	1	0	0	0	2	1	3	13	1	33	5	12	4	7	1	0	15	25	9	8	1	16	6	19	1	7	11	3	2	1	0	0	0	1	3	7
Mycmac1	117	Wood saprotroph	Mycena maculata	Basidiomycota	Agaricomycetes	Agaricales	Mycenaceae	Mycena	55	2	9	0	1	1	1	0	0	3	1	3	9	1	23	4	12	3	8	1	0	23	18	7	5	1	9	3	17	1	6	9	3	1	2	0	0	0	1	4	6
Mycreb1	118	Litter saprotroph	Mycena rebaudengoi	Basidiomycota	Agaricomycetes	Agaricales	Mycenaceae	Mycena	74	4	27	0	1	1	1	0	0	4	1	8	8	1	24	8	10	7	9	2	0	38	24	7	4	1	17	7	6	1	36	16	2	1	2	0	0	1	2	5	6
Myc59_1	119	Litter saprotroph	Mycena sp.	Basidiomycota	Agaricomycetes	Agaricales	Mycenaceae	Mycena	47	0	8	0	1	1	1	0	2	1	1	14	7	1	18	5	10	2	7	2	0	27	21	8	6	1	10	3	20	1	18	18	2	1	2	0	0	1	1	4	7
Mycami1	120	Wood saprotroph	Mycena amicta	Basidiomycota	Agaricomycetes	Agaricales	Mycenaceae	Mycena	70	2	10	0	1	1	1	0	1	0	0	5	11	1	14	4	11	2	7	1	0	6	20	8	4	1	21	3	7	1	3	18	5	1	3	0	0	0	1	3	6
Mycpur1	121	Grass saprotroph	Mycena pura	Basidiomycota	Agaricomycetes	Agaricales	Mycenaceae	Mycena	41	1	6	0	1	1	1	0	0	1	1	6	14	1	14	5	10	3	4	1	0	12	22	7	4	1	14	3	11	1	5	8	4	1	4	0	0	0	2	4	7
Rorror1	122	Litter saprotroph	Roridomyces roridus	Basidiomycota	Agaricomycetes	Agaricales	Mycenaceae	Roridomyces	67	6	10	0	1	1	1	0	0	0	0	7	14	1	23	5	9	2	5	2	0	23	15	8	8	1	20	3	5	1	1	10	3	1	2	0	0	1	0	4	6
[truncated: 177 more columns]

## Sheet: Lipase secreted
Table S5 - The count of secreted lipases
JGI_ID	CladeOrder	Ecology	SpeciesName	Phylum	Class	Order	Family	Genus	GGGX.ABH01	GGGX.ABH03	GX.ABH19	GX.ABH23	GX.ABH09	GX.ABH22	GX.ABH07	GX.ABH16	GX.ABH14	GX.ABH32	GGGX.ABH04
Phocon1	1	Wood saprotroph	Pholiota conissans	Basidiomycota	Agaricomycetes	Agaricales	Strophariaceae	Pholiota	2	21	1	3	0	0	0	0	0	0	0
Phosp1	2	Wood saprotroph	Pholiota sp.	Basidiomycota	Agaricomycetes	Agaricales	Strophariaceae	Pholiota	3	16	1	4	0	0	0	0	0	0	0
Phohig1	3	Soil saprotroph	Pholiota molesta	Basidiomycota	Agaricomycetes	Agaricales	Strophariaceae	Pholiota	1	15	1	4	0	0	0	0	0	0	0
Hypsu1	4	Wood saprotroph	Hypholoma sublateritium	Basidiomycota	Agaricomycetes	Agaricales	Strophariaceae	Hypholoma	8	23	1	3	0	0	0	0	0	0	0
Phoaln1	5	Soil saprotroph	Pholiota alnicola	Basidiomycota	Agaricomycetes	Agaricales	Strophariaceae	Flammula	3	17	1	1	0	0	0	0	0	0	0
Hebvel2	6	Ectomycorrhiza	Hebeloma brunneifolium	Basidiomycota	Agaricomycetes	Agaricales	Hymenogastraceae	Hebeloma	0	14	1	4	0	0	0	0	0	0	0
Hebcy2	7	Ectomycorrhiza	Hebeloma cylindrosporum	Basidiomycota	Agaricomycetes	Agaricales	Hymenogastraceae	Hebeloma	0	11	1	3	0	0	0	0	0	0	0
Psicub1_1	8	Grass saprotroph	Psilocybe cubensis	Basidiomycota	Agaricomycetes	Agaricales	Strophariaceae	Psilocybe	9	25	1	4	0	0	0	0	0	0	0
Psiser1	9	Litter saprotroph	Psilocybe serbica	Basidiomycota	Agaricomycetes	Agaricales	Strophariaceae	Psilocybe	11	25	1	3	0	0	0	0	0	0	0
Agrped1	10	Grass saprotroph	Agrocybe pediades	Basidiomycota	Agaricomycetes	Agaricales	Strophariaceae	Agrocybe	9	31	1	3	0	0	0	0	0	0	0
Agrpra2	11	Litter saprotroph	Agrocybe praecox	Basidiomycota	Agaricomycetes	Agaricales	Strophariaceae	Agrocybe	7	17	0	6	0	0	0	0	0	0	0
Gymch1	12	Wood saprotroph	Gymnopilus chrysopellus	Basidiomycota	Agaricomycetes	Agaricales	Hymenogastraceae	Gymnopilus	4	16	1	2	0	0	0	0	0	0	0
Gymjun1	13	Wood saprotroph	Gymnopilus junonius	Basidiomycota	Agaricomycetes	Agaricales	Hymenogastraceae	Gymnopilus	2	15	1	2	0	0	0	0	0	0	0
Galma1	14	Wood saprotroph	Galerina marginata	Basidiomycota	Agaricomycetes	Agaricales	Strophariaceae	Galerina	2	25	1	1	0	1	0	0	0	0	0
Crafun1	15	Soil saprotroph	Crassisporium funariophilum	Basidiomycota	Agaricomycetes	Agaricales	Crassisporiaceae	Crassisporium	4	11	1	3	0	0	0	0	0	0	0
Corgl3	16	Ectomycorrhiza	Phlegmacium glaucopus	Basidiomycota	Agaricomycetes	Agaricales	Cortinariaceae	Phlegmacium	1	6	1	4	0	0	0	0	0	0	0
Crevar1	17	Wood saprotroph	Crepidotus variabilis	Basidiomycota	Agaricomycetes	Agaricales	Crepidotaceae	Crepidotus	5	14	1	4	0	0	0	0	0	0	0
Creces1	18	Wood saprotroph	Crepidotus cesatii	Basidiomycota	Agaricomycetes	Agaricales	Crepidotaceae	Crepidotus	1	19	1	4	0	0	0	0	0	0	0
Inolan1	19	Wood saprotroph	Inosperma lanatodiscum	Basidiomycota	Agaricomycetes	Agaricales	Inocybaceae	Inosperma	0	21	0	1	0	0	0	0	0	0	0
Phapla1	20	Wood saprotroph	Phaeosolenia platensis	Basidiomycota	Agaricomycetes	Agaricales	Chromocyphellaceae	Phaeosolenia	2	8	0	3	0	0	0	1	0	0	0
Panpap1	21	Grass saprotroph	Panaeolus papilionaceus	Basidiomycota	Agaricomycetes	Agaricales	Galeropsidaceae	Panaeolus	6	17	1	5	0	0	0	0	0	0	0
Conapa1	22	Grass saprotroph	Conocybe apala	Basidiomycota	Agaricomycetes	Agaricales	Bolbitiaceae	Conocybe	4	25	1	5	0	0	0	0	0	0	0
Bolvit1	23	Grass saprotroph	Bolbitius vitellinus	Basidiomycota	Agaricomycetes	Agaricales	Bolbitiaceae	Bolbitius	2	7	1	5	0	0	0	0	0	0	0
Copci1	24	Litter saprotroph	Coprinopsis cinerea	Basidiomycota	Agaricomycetes	Agaricales	Psathyrellaceae	Coprinopsis	3	8	1	1	0	0	0	0	0	0	0
Copscl1	25	Grass saprotroph	Coprinopsis sclerotiger	Basidiomycota	Agaricomycetes	Agaricales	Psathyrellaceae	Coprinopsis	4	9	1	8	0	0	0	0	0	0	0
Copmar1	26	Grass saprotroph	Coprinopsis marcescibilis	Basidiomycota	Agaricomycetes	Agaricales	Psathyrellaceae	Coprinopsis	4	16	1	2	0	0	0	0	0	0	0
Coppel1	27	Grass saprotroph	Coprinellus pellucidus	Basidiomycota	Agaricomycetes	Agaricales	Psathyrellaceae	Coprinellus	4	7	1	3	0	0	0	0	0	0	0
Copang1	28	Litter saprotroph	Coprinellus angulatus	Basidiomycota	Agaricomycetes	Agaricales	Psathyrellaceae	Tulosesus	4	17	1	4	0	0	0	0	0	0	0
Copmic2	29	Litter saprotroph	Coprinellus micaceus	Basidiomycota	Agaricomycetes	Agaricales	Psathyrellaceae	Coprinellus	3	15	0	3	0	0	0	0	1	0	0
Lacam2	30	Ectomycorrhiza	Laccaria amethystina	Basidiomycota	Agaricomycetes	Agaricales	Hydnangiaceae	Laccaria	0	6	1	1	0	0	0	0	0	0	0
Lacbi2	31	Ectomycorrhiza	Laccaria bicolor	Basidiomycota	Agaricomycetes	Agaricales	Hydnangiaceae	Laccaria	0	12	1	4	0	0	0	0	0	0	0
Cyapal1	32	Wood saprotroph	Cyathus pallidus	Basidiomycota	Agaricomycetes	Agaricales	Nidulariaceae	Cyathus	10	39	1	13	2	0	0	0	0	0	0
Cyaste1	33	Grass saprotroph	Cyathus stercoreus	Basidiomycota	Agaricomycetes	Agaricales	Nidulariaceae	Cyathus	13	37	1	9	1	0	0	0	0	0	0
Cyastr2	34	Wood saprotroph	Cyathus striatus	Basidiomycota	Agaricomycetes	Agaricales	Nidulariaceae	Cyathus	9	25	1	4	0	0	0	0	0	0	0
Mycden1	35	Wood saprotroph	Mycocalia denudata	Basidiomycota	Agaricomycetes	Agaricales	Nidulariaceae	Mycocalia	6	14	1	4	0	0	0	0	0	0	0
Nidsp1	36	Wood saprotroph	Nidula sp.	Basidiomycota	Agaricomycetes	Agaricales	Nidulariaceae	Nidula	11	17	0	7	0	0	0	0	0	0	0
Crula1	37	Wood saprotroph	Crucibulum laeve	Basidiomycota	Agaricomycetes	Agaricales	Nidulariaceae	Crucibulum	3	17	1	5	0	0	0	0	0	0	0
Agabi_varbisH97_2	38	Grass saprotroph	Agaricus bisporus H97	Basidiomycota	Agaricomycetes	Agaricales	Agaricaceae	Agaricus	2	11	1	3	1	0	0	0	0	0	0
Agabi_varbur_1	39	Grass saprotroph	Agaricus bisporus	Basidiomycota	Agaricomycetes	Agaricales	Agaricaceae	Agaricus	3	10	1	4	0	0	0	0	0	0	0
Agasi1	40	Grass saprotroph	Agaricus sinodeliciosus	Basidiomycota	Agaricomycetes	Agaricales	Agaricaceae	Agaricus	1	8	1	3	0	0	0	0	0	0	0
Macfu1	41	Litter saprotroph	Macrolepiota fuliginosa	Basidiomycota	Agaricomycetes	Agaricales	Agaricaceae	Macrolepiota	2	20	1	1	0	0	0	0	0	0	0
Lycper1	42	Litter saprotroph	Lycoperdon perlatum	Basidiomycota	Agaricomycetes	Agaricales	Lycoperdaceae	Lycoperdon	6	22	1	2	0	0	1	0	0	0	0
Amaapr1	43	Ectomycorrhiza	Amanita muscaria	Basidiomycota	Agaricomycetes	Agaricales	Amanitaceae	Amanita	0	5	1	3	0	1	0	0	0	0	0
Amamu1	44	Ectomycorrhiza	Amanita muscaria Koide	Basidiomycota	Agaricomycetes	Agaricales	Amanitaceae	Amanita	0	8	1	2	0	0	0	0	0	0	0
Amarub1	45	Ectomycorrhiza	Amanita rubescens	Basidiomycota	Agaricomycetes	Agaricales	Amanitaceae	Amanita	0	8	1	1	0	0	0	0	0	0	0
Amath1	46	Ectomycorrhiza	Amanita thiersii	Basidiomycota	Agaricomycetes	Agaricales	Amanitaceae	Amanita	1	12	1	6	0	0	0	0	0	0	0
Trima3	47	Ectomycorrhiza	Tricholoma matsutake	Basidiomycota	Agaricomycetes	Agaricales	Tricholomataceae	Tricholoma	0	2	1	2	0	0	0	0	0	0	0
Tripop1	48	Ectomycorrhiza	Tricholoma populinum	Basidiomycota	Agaricomycetes	Agaricales	Tricholomataceae	Tricholoma	0	2	1	2	0	0	0	0	0	0	0
Lepnud1	49	Litter saprotroph	Lepista nuda	Basidiomycota	Agaricomycetes	Agaricales	Clitocybaceae	Collybia	3	17	1	15	0	0	0	0	0	0	0
Lyoat1	50	Soil saprotroph	Lyophyllum atratum	Basidiomycota	Agaricomycetes	Agaricales	Lyophyllaceae	Lyophyllum	3	10	0	7	0	0	0	0	0	0	0
TerJ132_1	51	Grass saprotroph	Termitomyces sp.	Basidiomycota	Agaricomycetes	Agaricales	Lyophyllaceae	Termitomyces	3	8	0	0	0	0	0	0	0	0	0
Hypma1	52	Wood saprotroph	Hypsizygus marmoreus	Basidiomycota	Agaricomycetes	Agaricales	Lyophyllaceae	Hypsizygus	3	10	0	2	0	0	0	0	0	0	0
Cligib1	53	Litter saprotroph	Clitocybe gibba	Basidiomycota	Agaricomycetes	Agaricales		Infundibulicybe	2	15	1	4	0	0	0	0	0	0	0
Plucer1	54	Wood saprotroph	Pluteus cervinus	Basidiomycota	Agaricomycetes	Agaricales	Pluteaceae	Pluteus	3	11	1	5	0	0	0	0	0	0	0
Volvo1	55	Grass saprotroph	Volvariella volvacea	Basidiomycota	Agaricomycetes	Agaricales	Pluteaceae	Volvariella	1	7	1	4	0	0	0	0	0	0	0
Radcon1	56	Wood saprotroph	Radulomyces confluens	Basidiomycota	Agaricomycetes	Agaricales	Radulomycetaceae	Radulomyces	2	47	1	3	0	0	0	0	0	0	0
Aphpse1	57	Wood saprotroph	Aphanobasidium pseudotsugae	Basidiomycota	Agaricomycetes	Agaricales	Radulomycetaceae	Aphanobasidium	2	13	1	5	0	0	0	0	0	0	0
Ptegra1	58	Grass saprotroph	Pterula gracilis	Basidiomycota	Agaricomycetes	Agaricales	Pterulaceae	Pterula	0	15	1	4	0	0	0	1	0	0	0
Hygcoc2	59	Grass saprotroph	Hygrocybe coccinea	Basidiomycota	Agaricomycetes	Agaricales	Hygrophoraceae	Hygrocybe	0	0	1	1	0	0	0	0	0	0	0
Crison1	60	Pathogen	Cristinia sonorae	Basidiomycota	Agaricomycetes	Agaricales	Stephanosporaceae	Cristinia	2	5	1	2	0	0	0	0	0	0	0
PleosPC9_1	61	Wood saprotroph	Pleurotus ostreatus	Basidiomycota	Agaricomycetes	Agaricales	Pleurotaceae	Pleurotus	1	19	1	6	0	0	0	0	0	0	0
Pleery1	62	Wood saprotroph	Pleurotus eryngii	Basidiomycota	Agaricomycetes	Agaricales	Pleurotaceae	Pleurotus	1	11	1	7	0	0	0	0	0	0	0
Armga1	63	Wood saprotroph	Armillaria gallica	Basidiomycota	Agaricomycetes	Agaricales	Physalacriaceae	Armillaria	0	19	1	5	0	0	0	0	0	0	0
Armcep1	64	Wood saprotroph	Armillaria cepistipes	Basidiomycota	Agaricomycetes	Agaricales	Physalacriaceae	Armillaria	0	18	1	6	0	0	1	0	0	0	0
Armnab1	65	Wood saprotroph	Armillaria nabsnona	Basidiomycota	Agaricomycetes	Agaricales	Physalacriaceae	Armillaria	0	19	1	7	0	0	0	0	0	0	0
Armost1	66	Pathogen	Armillaria ostoyae	Basidiomycota	Agaricomycetes	Agaricales	Physalacriaceae	Armillaria	0	27	1	7	0	0	0	0	0	0	0
Armosto1	67	Wood saprotroph	Armillaria solidipes	Basidiomycota	Agaricomycetes	Agaricales	Physalacriaceae	Armillaria	0	22	1	7	0	0	0	0	0	0	0
Armbor1	68	Wood saprotroph	Armillaria borealis	Basidiomycota	Agaricomycetes	Agaricales	Physalacriaceae	Armillaria	0	28	1	8	0	0	0	0	0	0	0
Armfum1	69	Wood saprotroph	Armillaria fumosa	Basidiomycota	Agaricomycetes	Agaricales	Physalacriaceae	Armillaria	0	22	1	4	0	0	0	0	0	0	0
Armlut1	70	Litter saprotroph	Armillaria luteobubalina	Basidiomycota	Agaricomycetes	Agaricales	Physalacriaceae	Armillaria	0	20	1	9	0	0	0	0	0	0	0
Armnov1	71	Pathogen	Armillaria novae-zelandiae	Basidiomycota	Agaricomycetes	Agaricales	Physalacriaceae	Armillaria	0	19	1	6	0	0	0	0	0	0	0
Armme1_1	72	Pathogen	Armillaria mellea	Basidiomycota	Agaricomycetes	Agaricales	Physalacriaceae	Armillaria	0	14	1	10	0	0	1	0	0	0	0
Armect1	73	Litter saprotroph	Armillaria ectypa	Basidiomycota	Agaricomycetes	Agaricales	Physalacriaceae	Desarmillaria	0	16	1	7	0	0	0	0	0	0	0
Armtab1	74	Wood saprotroph	Armillaria tabescens	Basidiomycota	Agaricomycetes	Agaricales	Physalacriaceae	Desarmillaria	0	38	1	7	0	0	0	0	0	0	0
Guyne1	75	Wood saprotroph	Guyanagaster necrorhizus	Basidiomycota	Agaricomycetes	Agaricales	Physalacriaceae	Guyanagaster	0	22	0	5	0	0	0	0	0	0	0
Hymrad1	76	Wood saprotroph	Hymenopellis radicata	Basidiomycota	Agaricomycetes	Agaricales	Physalacriaceae	Hymenopellis	2	44	2	5	0	0	0	0	0	0	0
Oudmuc1	77	Wood saprotroph	Oudemansiella mucida	Basidiomycota	Agaricomycetes	Agaricales	Physalacriaceae	Mucidula	0	25	1	2	0	0	0	0	0	0	0
Cylto1	78	Wood saprotroph	Cylindrobasidium torrendii	Basidiomycota	Agaricomycetes	Agaricales	Physalacriaceae	Cylindrobasidium	1	15	1	3	0	0	0	0	0	2	0
Rhobu1	79	Litter saprotroph	Rhodocollybia butyracea	Basidiomycota	Agaricomycetes	Agaricales	Omphalotaceae	Rhodocollybia	8	18	1	3	0	0	0	0	0	0	0
Lenlat1	80	Wood saprotroph	Lentinula lateritia	Basidiomycota	Agaricomycetes	Agaricales	Omphalotaceae	Lentinula	2	10	1	2	0	0	0	0	0	0	0
Gymlu1	81	Wood saprotroph	Gymnopus luxurians	Basidiomycota	Agaricomycetes	Agaricales	Omphalotaceae	Collybiopsis	10	24	1	4	0	0	0	0	0	0	0
Gyman1	82	Litter saprotroph	Gymnopus androsaceus	Basidiomycota	Agaricomycetes	Agaricales	Omphalotaceae	Gymnopus	9	27	1	1	0	0	0	0	0	0	0
Gymear1	83	Soil saprotroph	Gymnopus earleae	Basidiomycota	Agaricomycetes	Agaricales	Omphalotaceae	Gymnopus	11	17	1	2	0	1	0	0	0	0	0
Ompol1	84	Wood saprotroph	Omphalotus olearius	Basidiomycota	Agaricomycetes	Agaricales	Omphalotaceae	Omphalotus	1	8	0	1	0	0	0	0	0	0	0
Denbi1	85	Wood saprotroph	Dendrothele bispora	Basidiomycota	Agaricomycetes	Agaricales		Dendrothele	2	40	1	2	1	0	0	0	0	0	0
Marfi1	86	Litter saprotroph	Marasmius fiardii	Basidiomycota	Agaricomycetes	Agaricales	Marasmiaceae	Marasmius	6	27	1	8	0	0	0	0	0	0	0
MroMCA2997_1	87	Pathogen	Moniliophthora roreri	Basidiomycota	Agaricomycetes	Agaricales	Marasmiaceae	Moniliophthora	2	35	1	3	0	0	0	0	0	0	0
Cysmur1	88	Pathogen	Cystostereum murrayi	Basidiomycota	Agaricomycetes	Agaricales	Cystostereaceae	Cystostereum	0	15	1	2	0	0	0	0	0	0	0
Mycflo1	89	Litter saprotroph	Mycena floridula	Basidiomycota	Agaricomycetes	Agaricales	Mycenaceae	Mycena	6	39	1	4	0	0	0	0	0	0	0
Schco_LoeD_1	90	Wood saprotroph	Schizophyllum commune	Basidiomycota	Agaricomycetes	Agaricales	Schizophyllaceae	Schizophyllum	1	14	1	1	0	1	0	0	0	0	0
Schrad1	91	Wood saprotroph	Schizophyllum radiatum	Basidiomycota	Agaricomycetes	Agaricales	Schizophyllaceae	Schizophyllum	1	13	1	1	0	0	0	0	0	0	0
Schfas1	92	Litter saprotroph	Schizophyllum fasciatum	Basidiomycota	Agaricomycetes	Agaricales	Schizophyllaceae	Schizophyllum	1	13	1	0	0	0	0	0	0	0	0
Auramp1	93	Wood saprotroph	Auriculariopsis ampla	Basidiomycota	Agaricomycetes	Agaricales	Schizophyllaceae	Auriculariopsis	1	9	1	2	0	1	0	1	0	0	0
Fishe1	94	Wood saprotroph	Fistulina hepatica	Basidiomycota	Agaricomycetes	Agaricales	Fistulinaceae	Fistulina	7	7	1	2	0	0	0	0	0	0	0
Niavib1	95	Wood saprotroph	Nia vibrissa	Basidiomycota	Agaricomycetes	Agaricales	Cyphellopsidaceae	Nia	0	7	1	4	0	0	0	0	0	0	0
Denmi1	96	Wood saprotroph	Dendrothele microspora	Basidiomycota	Agaricomycetes	Agaricales		Dendrothele	3	26	1	6	1	0	0	0	0	0	1
Mychae1	97	Wood saprotroph	Mycena haematopus	Basidiomycota	Agaricomycetes	Agaricales	Mycenaceae	Mycena	8	30	1	6	0	0	0	0	0	0	0
Mycsan1	98	Litter saprotroph	Mycena sanguinolenta	Basidiomycota	Agaricomycetes	Agaricales	Mycenaceae	Mycena	14	51	1	2	0	0	0	1	0	0	0
Mycgal1	99	Litter saprotroph	Mycena galopus	Basidiomycota	Agaricomycetes	Agaricales	Mycenaceae	Mycena	10	65	1	7	0	0	0	1	0	0	0
Mycalb1	100	Grass saprotroph	Mycena albidolilacea	Basidiomycota	Agaricomycetes	Agaricales	Mycenaceae	Mycena	18	63	1	5	1	0	0	0	0	0	0
Mycoli1	101	Grass saprotroph	Mycena olivaceomarginata	Basidiomycota	Agaricomycetes	Agaricales	Mycenaceae	Mycena	26	115	1	11	0	0	0	0	0	0	0
Favcal1_2	102	Wood saprotroph	Favolaschia claudopus	Basidiomycota	Agaricomycetes	Agaricales	Mycenaceae	Favolaschia	6	48	0	7	0	0	0	0	0	0	0
Mycvit1	103	Litter saprotroph	Mycena vitilis	Basidiomycota	Agaricomycetes	Agaricales	Mycenaceae	Mycena	9	40	1	14	0	0	0	0	0	0	0
Mycpol1	104	Wood saprotroph	Mycena polygramma	Basidiomycota	Agaricomycetes	Agaricales	Mycenaceae	Mycena	12	77	0	14	0	1	0	0	0	0	0
Mycrub1	105	Litter saprotroph	Mycena capillaripes	Basidiomycota	Agaricomycetes	Agaricales	Mycenaceae	Mycena	11	65	1	8	0	1	0	0	0	0	0
Myclep1	106	Litter saprotroph	Mycena leptocephala	Basidiomycota	Agaricomycetes	Agaricales	Mycenaceae	Mycena	21	103	1	18	0	0	0	0	0	0	0
Mycmet1	107	Litter saprotroph	Mycena metata	Basidiomycota	Agaricomycetes	Agaricales	Mycenaceae	Mycena	13	38	1	8	0	0	0	0	0	0	0
Mycale1	108	Litter saprotroph	Mycena alexandri	Basidiomycota	Agaricomycetes	Agaricales	Mycenaceae	Mycena	16	36	1	7	0	0	0	0	0	0	0
Mycfil1	109	Litter saprotroph	Mycena filopes	Basidiomycota	Agaricomycetes	Agaricales	Mycenaceae	Mycena	4	54	1	12	0	0	0	0	0	0	0
Mycbel1	110	Grass saprotroph	Mycena belliae	Basidiomycota	Agaricomycetes	Agaricales	Mycenaceae	Mycena	3	13	1	4	0	0	0	0	0	0	0
Myclat1	111	Grass saprotroph	Mycena latifolia	Basidiomycota	Agaricomycetes	Agaricales	Mycenaceae	Mycena	16	79	1	6	0	0	0	0	0	0	0
Mycros1	112	Litter saprotroph	Mycena rosella	Basidiomycota	Agaricomycetes	Agaricales	Mycenaceae	Mycena	6	54	1	3	0	0	0	0	0	0	0
Mycvul1	113	Litter saprotroph	Mycena vulgaris	Basidiomycota	Agaricomycetes	Agaricales	Mycenaceae	Mycena	10	66	0	9	0	0	0	0	0	0	0
Mycepi1	114	Litter saprotroph	Mycena epipterygia	Basidiomycota	Agaricomycetes	Agaricales	Mycenaceae	Mycena	10	86	1	9	0	0	0	0	0	0	1
Myccro1	115	Litter saprotroph	Mycena crocata	Basidiomycota	Agaricomycetes	Agaricales	Mycenaceae	Mycena	5	48	0	5	0	1	0	0	0	0	0
Mycgale1	116	Wood saprotroph	Mycena galericulata	Basidiomycota	Agaricomycetes	Agaricales	Mycenaceae	Mycena	11	56	1	12	0	1	0	0	0	0	0
Mycmac1	117	Wood saprotroph	Mycena maculata	Basidiomycota	Agaricomycetes	Agaricales	Mycenaceae	Mycena	5	41	1	6	0	0	0	0	0	0	0
Mycreb1	118	Litter saprotroph	Mycena rebaudengoi	Basidiomycota	Agaricomycetes	Agaricales	Mycenaceae	Mycena	20	79	1	2	0	0	0	0	0	0	0
Myc59_1	119	Litter saprotroph	Mycena sp.	Basidiomycota	Agaricomycetes	Agaricales	Mycenaceae	Mycena	6	27	1	6	0	0	0	0	0	0	0
Mycami1	120	Wood saprotroph	Mycena amicta	Basidiomycota	Agaricomycetes	Agaricales	Mycenaceae	Mycena	4	38	1	6	0	0	0	0	0	0	0
Mycpur1	121	Grass saprotroph	Mycena pura	Basidiomycota	Agaricomycetes	Agaricales	Mycenaceae	Mycena	11	35	1	8	0	0	0	0	0	0	0
Rorror1	122	Litter saprotroph	Roridomyces roridus	Basidiomycota	Agaricomycetes	Agaricales	Mycenaceae	Roridomyces	12	40	1	3	0	0	0	0	0	0	0

## Sheet: Lipase total
Table S5 - The count of total lipases
JGI_ID	CladeOrder	Ecology	SpeciesName	Phylum	Class	Order	Family	Genus	GGGX.ABH01	GGGX.ABH03	GGGX.ABH04	GX.ABH07	GX.ABH09	GX.ABH14	GX.ABH19	GX.ABH22	GX.ABH23	Y.ABH27	GGGX.ABH02	GX.ABH32	GX.ABH08	GX.ABH16	GX.ABH36	GX.ABH15	GX.ABH21
Phocon1	1	Wood saprotroph	Pholiota conissans	Basidiomycota	Agaricomycetes	Agaricales	Strophariaceae	Pholiota	3	28	1	1	1	1	1	1	5	1	0	0	0	0	0	0	0
Phosp1	2	Wood saprotroph	Pholiota sp.	Basidiomycota	Agaricomycetes	Agaricales	Strophariaceae	Pholiota	3	21	1	1	1	1	1	1	4	1	0	0	0	0	0	0	0
Phohig1	3	Soil saprotroph	Pholiota molesta	Basidiomycota	Agaricomycetes	Agaricales	Strophariaceae	Pholiota	1	24	1	1	2	1	1	1	6	1	0	0	0	0	0	0	0
Hypsu1	4	Wood saprotroph	Hypholoma sublateritium	Basidiomycota	Agaricomycetes	Agaricales	Strophariaceae	Hypholoma	8	30	2	1	0	1	1	1	6	1	0	0	0	0	0	0	1
Phoaln1	5	Soil saprotroph	Pholiota alnicola	Basidiomycota	Agaricomycetes	Agaricales	Strophariaceae	Flammula	3	24	1	3	2	2	1	3	1	1	0	0	0	0	0	0	0
Hebvel2	6	Ectomycorrhiza	Hebeloma brunneifolium	Basidiomycota	Agaricomycetes	Agaricales	Hymenogastraceae	Hebeloma	0	19	1	2	0	1	1	3	8	1	0	0	1	0	2	1	0
Hebcy2	7	Ectomycorrhiza	Hebeloma cylindrosporum	Basidiomycota	Agaricomycetes	Agaricales	Hymenogastraceae	Hebeloma	0	13	1	2	0	1	1	3	5	1	0	0	1	0	2	0	0
Psicub1_1	8	Grass saprotroph	Psilocybe cubensis	Basidiomycota	Agaricomycetes	Agaricales	Strophariaceae	Psilocybe	10	28	2	1	1	2	1	2	5	1	0	0	0	0	0	0	0
Psiser1	9	Litter saprotroph	Psilocybe serbica	Basidiomycota	Agaricomycetes	Agaricales	Strophariaceae	Psilocybe	13	32	2	1	5	3	1	2	6	1	0	1	1	0	0	0	0
Agrped1	10	Grass saprotroph	Agrocybe pediades	Basidiomycota	Agaricomycetes	Agaricales	Strophariaceae	Agrocybe	13	34	1	1	0	2	1	3	6	1	0	0	0	0	0	0	0
Agrpra2	11	Litter saprotroph	Agrocybe praecox	Basidiomycota	Agaricomycetes	Agaricales	Strophariaceae	Agrocybe	9	26	1	1	3	2	1	2	8	2	0	0	0	0	0	0	0
Gymch1	12	Wood saprotroph	Gymnopilus chrysopellus	Basidiomycota	Agaricomycetes	Agaricales	Hymenogastraceae	Gymnopilus	4	21	1	1	2	1	1	4	6	1	0	0	0	0	0	0	0
Gymjun1	13	Wood saprotroph	Gymnopilus junonius	Basidiomycota	Agaricomycetes	Agaricales	Hymenogastraceae	Gymnopilus	5	16	1	1	0	1	1	3	5	1	0	0	0	0	0	0	0
Galma1	14	Wood saprotroph	Galerina marginata	Basidiomycota	Agaricomycetes	Agaricales	Strophariaceae	Galerina	3	28	1	1	0	1	1	3	3	1	0	0	2	0	0	0	0
Crafun1	15	Soil saprotroph	Crassisporium funariophilum	Basidiomycota	Agaricomycetes	Agaricales	Crassisporiaceae	Crassisporium	6	15	2	1	4	2	1	1	4	1	0	0	0	0	0	0	0
Corgl3	16	Ectomycorrhiza	Phlegmacium glaucopus	Basidiomycota	Agaricomycetes	Agaricales	Cortinariaceae	Phlegmacium	1	11	2	1	3	1	1	2	6	1	0	0	0	0	0	0	0
Crevar1	17	Wood saprotroph	Crepidotus variabilis	Basidiomycota	Agaricomycetes	Agaricales	Crepidotaceae	Crepidotus	5	20	0	0	3	2	1	3	5	1	0	0	0	0	0	0	0
Creces1	18	Wood saprotroph	Crepidotus cesatii	Basidiomycota	Agaricomycetes	Agaricales	Crepidotaceae	Crepidotus	3	20	0	1	3	2	1	3	5	1	0	0	0	0	0	0	0
Inolan1	19	Wood saprotroph	Inosperma lanatodiscum	Basidiomycota	Agaricomycetes	Agaricales	Inocybaceae	Inosperma	0	26	0	0	0	5	0	4	3	2	0	0	0	0	0	1	0
Phapla1	20	Wood saprotroph	Phaeosolenia platensis	Basidiomycota	Agaricomycetes	Agaricales	Chromocyphellaceae	Phaeosolenia	2	14	0	1	3	1	1	5	6	2	0	0	0	1	0	0	0
Panpap1	21	Grass saprotroph	Panaeolus papilionaceus	Basidiomycota	Agaricomycetes	Agaricales	Galeropsidaceae	Panaeolus	7	21	1	0	4	2	1	3	6	1	0	0	0	0	1	0	0
Conapa1	22	Grass saprotroph	Conocybe apala	Basidiomycota	Agaricomycetes	Agaricales	Bolbitiaceae	Conocybe	5	36	2	0	3	2	1	2	9	2	0	0	0	0	1	0	0
Bolvit1	23	Grass saprotroph	Bolbitius vitellinus	Basidiomycota	Agaricomycetes	Agaricales	Bolbitiaceae	Bolbitius	2	11	1	1	8	2	1	2	7	1	0	0	0	0	0	0	0
Copci1	24	Litter saprotroph	Coprinopsis cinerea	Basidiomycota	Agaricomycetes	Agaricales	Psathyrellaceae	Coprinopsis	3	12	0	3	1	1	1	2	2	1	0	2	0	0	2	0	0
Copscl1	25	Grass saprotroph	Coprinopsis sclerotiger	Basidiomycota	Agaricomycetes	Agaricales	Psathyrellaceae	Coprinopsis	4	10	0	3	1	1	1	2	9	1	0	1	0	0	8	0	0
Copmar1	26	Grass saprotroph	Coprinopsis marcescibilis	Basidiomycota	Agaricomycetes	Agaricales	Psathyrellaceae	Coprinopsis	5	20	0	3	1	1	1	2	3	1	0	4	0	0	0	1	0
Coppel1	27	Grass saprotroph	Coprinellus pellucidus	Basidiomycota	Agaricomycetes	Agaricales	Psathyrellaceae	Coprinellus	6	8	1	3	1	1	1	3	4	1	0	2	0	0	0	1	0
Copang1	28	Litter saprotroph	Coprinellus angulatus	Basidiomycota	Agaricomycetes	Agaricales	Psathyrellaceae	Tulosesus	6	19	3	2	2	1	1	4	5	1	0	3	0	0	0	0	0
Copmic2	29	Litter saprotroph	Coprinellus micaceus	Basidiomycota	Agaricomycetes	Agaricales	Psathyrellaceae	Coprinellus	4	21	1	3	0	1	0	8	5	2	0	10	0	0	0	1	0
Lacam2	30	Ectomycorrhiza	Laccaria amethystina	Basidiomycota	Agaricomycetes	Agaricales	Hydnangiaceae	Laccaria	0	11	0	0	2	2	1	1	2	3	0	0	0	0	0	1	0
Lacbi2	31	Ectomycorrhiza	Laccaria bicolor	Basidiomycota	Agaricomycetes	Agaricales	Hydnangiaceae	Laccaria	0	13	0	1	0	2	1	1	6	1	0	0	0	0	0	0	0
Cyapal1	32	Wood saprotroph	Cyathus pallidus	Basidiomycota	Agaricomycetes	Agaricales	Nidulariaceae	Cyathus	16	55	2	1	4	1	1	3	15	2	0	0	0	0	0	1	0
Cyaste1	33	Grass saprotroph	Cyathus stercoreus	Basidiomycota	Agaricomycetes	Agaricales	Nidulariaceae	Cyathus	17	44	1	2	5	1	1	2	10	1	0	0	0	0	0	0	0
Cyastr2	34	Wood saprotroph	Cyathus striatus	Basidiomycota	Agaricomycetes	Agaricales	Nidulariaceae	Cyathus	14	33	2	2	4	2	2	2	6	1	0	0	0	0	0	0	0
Mycden1	35	Wood saprotroph	Mycocalia denudata	Basidiomycota	Agaricomycetes	Agaricales	Nidulariaceae	Mycocalia	6	17	0	1	2	2	1	1	5	1	0	0	0	0	0	0	0
Nidsp1	36	Wood saprotroph	Nidula sp.	Basidiomycota	Agaricomycetes	Agaricales	Nidulariaceae	Nidula	13	22	1	1	1	1	0	4	9	2	0	0	0	0	0	0	0
Crula1	37	Wood saprotroph	Crucibulum laeve	Basidiomycota	Agaricomycetes	Agaricales	Nidulariaceae	Crucibulum	3	20	2	1	4	1	1	3	7	1	0	0	0	0	0	0	0
Agabi_varbisH97_2	38	Grass saprotroph	Agaricus bisporus H97	Basidiomycota	Agaricomycetes	Agaricales	Agaricaceae	Agaricus	2	13	3	2	1	1	1	1	4	1	1	0	0	0	0	0	0
Agabi_varbur_1	39	Grass saprotroph	Agaricus bisporus	Basidiomycota	Agaricomycetes	Agaricales	Agaricaceae	Agaricus	3	12	3	2	1	1	1	1	5	1	0	0	0	0	0	0	0
Agasi1	40	Grass saprotroph	Agaricus sinodeliciosus	Basidiomycota	Agaricomycetes	Agaricales	Agaricaceae	Agaricus	2	11	2	2	0	1	1	1	5	1	1	0	0	0	0	0	0
Macfu1	41	Litter saprotroph	Macrolepiota fuliginosa	Basidiomycota	Agaricomycetes	Agaricales	Agaricaceae	Macrolepiota	3	20	1	3	0	1	1	1	3	1	0	0	0	0	0	0	0
Lycper1	42	Litter saprotroph	Lycoperdon perlatum	Basidiomycota	Agaricomycetes	Agaricales	Lycoperdaceae	Lycoperdon	6	26	2	1	2	1	1	3	4	1	0	0	0	0	0	0	0
Amaapr1	43	Ectomycorrhiza	Amanita muscaria	Basidiomycota	Agaricomycetes	Agaricales	Amanitaceae	Amanita	0	5	2	0	5	1	1	27	4	1	0	1	0	0	0	0	0
Amamu1	44	Ectomycorrhiza	Amanita muscaria Koide	Basidiomycota	Agaricomycetes	Agaricales	Amanitaceae	Amanita	0	9	1	1	3	1	1	10	3	1	1	1	0	0	0	0	0
Amarub1	45	Ectomycorrhiza	Amanita rubescens	Basidiomycota	Agaricomycetes	Agaricales	Amanitaceae	Amanita	4	8	3	1	0	1	1	2	2	2	0	0	0	0	0	0	0
Amath1	46	Ectomycorrhiza	Amanita thiersii	Basidiomycota	Agaricomycetes	Agaricales	Amanitaceae	Amanita	4	14	1	0	1	1	1	4	8	1	0	0	0	0	0	0	0
Trima3	47	Ectomycorrhiza	Tricholoma matsutake	Basidiomycota	Agaricomycetes	Agaricales	Tricholomataceae	Tricholoma	2	2	1	1	1	1	1	5	4	3	0	0	0	0	0	0	0
Tripop1	48	Ectomycorrhiza	Tricholoma populinum	Basidiomycota	Agaricomycetes	Agaricales	Tricholomataceae	Tricholoma	3	2	1	1	3	1	1	5	4	1	0	0	0	0	0	0	0
Lepnud1	49	Litter saprotroph	Lepista nuda	Basidiomycota	Agaricomycetes	Agaricales	Clitocybaceae	Collybia	5	23	5	3	3	1	1	2	21	1	0	0	0	0	0	0	0
Lyoat1	50	Soil saprotroph	Lyophyllum atratum	Basidiomycota	Agaricomycetes	Agaricales	Lyophyllaceae	Lyophyllum	3	13	1	2	1	1	1	5	10	1	0	0	0	0	0	0	0
TerJ132_1	51	Grass saprotroph	Termitomyces sp.	Basidiomycota	Agaricomycetes	Agaricales	Lyophyllaceae	Termitomyces	4	9	0	2	2	1	1	3	2	1	0	1	0	0	0	0	0
Hypma1	52	Wood saprotroph	Hypsizygus marmoreus	Basidiomycota	Agaricomycetes	Agaricales	Lyophyllaceae	Hypsizygus	3	14	0	2	1	1	1	4	3	1	0	0	0	0	0	0	0
Cligib1	53	Litter saprotroph	Clitocybe gibba	Basidiomycota	Agaricomycetes	Agaricales		Infundibulicybe	4	25	1	2	0	2	1	2	5	1	0	0	1	0	1	0	0
Plucer1	54	Wood saprotroph	Pluteus cervinus	Basidiomycota	Agaricomycetes	Agaricales	Pluteaceae	Pluteus	4	12	2	1	1	1	1	6	8	1	0	0	0	0	0	0	1
Volvo1	55	Grass saprotroph	Volvariella volvacea	Basidiomycota	Agaricomycetes	Agaricales	Pluteaceae	Volvariella	2	7	1	0	2	1	1	3	5	0	0	0	0	0	0	1	0
Radcon1	56	Wood saprotroph	Radulomyces confluens	Basidiomycota	Agaricomycetes	Agaricales	Radulomycetaceae	Radulomyces	3	56	1	1	0	1	1	2	4	1	1	0	0	0	0	0	0
Aphpse1	57	Wood saprotroph	Aphanobasidium pseudotsugae	Basidiomycota	Agaricomycetes	Agaricales	Radulomycetaceae	Aphanobasidium	2	21	2	1	0	1	1	2	5	1	0	0	0	0	0	0	0
Ptegra1	58	Grass saprotroph	Pterula gracilis	Basidiomycota	Agaricomycetes	Agaricales	Pterulaceae	Pterula	0	23	2	1	1	1	1	4	7	2	0	0	0	1	0	0	0
Hygcoc2	59	Grass saprotroph	Hygrocybe coccinea	Basidiomycota	Agaricomycetes	Agaricales	Hygrophoraceae	Hygrocybe	0	0	0	1	0	1	1	2	3	1	0	0	0	0	0	0	0
Crison1	60	Pathogen	Cristinia sonorae	Basidiomycota	Agaricomycetes	Agaricales	Stephanosporaceae	Cristinia	2	6	6	1	1	1	1	1	3	1	0	0	0	0	0	0	0
PleosPC9_1	61	Wood saprotroph	Pleurotus ostreatus	Basidiomycota	Agaricomycetes	Agaricales	Pleurotaceae	Pleurotus	1	24	0	0	2	1	1	4	7	1	1	0	0	0	0	0	0
Pleery1	62	Wood saprotroph	Pleurotus eryngii	Basidiomycota	Agaricomycetes	Agaricales	Pleurotaceae	Pleurotus	1	13	1	1	1	1	1	4	8	1	0	0	0	0	0	0	0
Armga1	63	Wood saprotroph	Armillaria gallica	Basidiomycota	Agaricomycetes	Agaricales	Physalacriaceae	Armillaria	0	29	2	1	5	1	1	4	8	2	0	0	0	0	0	0	0
Armcep1	64	Wood saprotroph	Armillaria cepistipes	Basidiomycota	Agaricomycetes	Agaricales	Physalacriaceae	Armillaria	2	24	1	1	3	1	1	1	11	2	0	0	0	0	0	0	0
Armnab1	65	Wood saprotroph	Armillaria nabsnona	Basidiomycota	Agaricomycetes	Agaricales	Physalacriaceae	Armillaria	2	27	1	1	6	1	1	4	9	2	0	0	0	0	0	0	0
Armost1	66	Pathogen	Armillaria ostoyae	Basidiomycota	Agaricomycetes	Agaricales	Physalacriaceae	Armillaria	0	36	1	2	6	1	1	4	10	1	0	0	0	0	0	0	0
Armosto1	67	Wood saprotroph	Armillaria solidipes	Basidiomycota	Agaricomycetes	Agaricales	Physalacriaceae	Armillaria	0	26	1	1	6	0	1	3	9	1	0	0	0	0	0	0	0
Armbor1	68	Wood saprotroph	Armillaria borealis	Basidiomycota	Agaricomycetes	Agaricales	Physalacriaceae	Armillaria	1	33	1	1	7	1	1	5	11	2	0	0	0	0	0	0	0
Armfum1	69	Wood saprotroph	Armillaria fumosa	Basidiomycota	Agaricomycetes	Agaricales	Physalacriaceae	Armillaria	1	29	2	1	7	1	2	3	7	1	0	0	0	0	0	0	0
Armlut1	70	Litter saprotroph	Armillaria luteobubalina	Basidiomycota	Agaricomycetes	Agaricales	Physalacriaceae	Armillaria	0	30	1	1	11	1	2	9	12	1	0	0	0	0	0	0	0
Armnov1	71	Pathogen	Armillaria novae-zelandiae	Basidiomycota	Agaricomycetes	Agaricales	Physalacriaceae	Armillaria	2	25	2	1	10	1	1	14	7	1	0	0	0	0	0	0	0
Armme1_1	72	Pathogen	Armillaria mellea	Basidiomycota	Agaricomycetes	Agaricales	Physalacriaceae	Armillaria	1	25	1	1	2	1	1	2	12	2	0	0	0	0	0	0	0
Armect1	73	Litter saprotroph	Armillaria ectypa	Basidiomycota	Agaricomycetes	Agaricales	Physalacriaceae	Desarmillaria	1	22	1	1	6	1	1	3	9	2	0	0	0	0	0	0	0
Armtab1	74	Wood saprotroph	Armillaria tabescens	Basidiomycota	Agaricomycetes	Agaricales	Physalacriaceae	Desarmillaria	0	43	1	1	5	1	1	4	8	1	0	0	2	0	0	0	0
Guyne1	75	Wood saprotroph	Guyanagaster necrorhizus	Basidiomycota	Agaricomycetes	Agaricales	Physalacriaceae	Guyanagaster	1	26	1	0	3	1	1	1	7	1	0	0	0	0	0	0	0
Hymrad1	76	Wood saprotroph	Hymenopellis radicata	Basidiomycota	Agaricomycetes	Agaricales	Physalacriaceae	Hymenopellis	3	62	1	1	1	1	3	1	8	1	0	3	0	0	0	0	0
Oudmuc1	77	Wood saprotroph	Oudemansiella mucida	Basidiomycota	Agaricomycetes	Agaricales	Physalacriaceae	Mucidula	0	37	2	1	1	1	1	1	3	1	0	0	0	0	0	0	1
Cylto1	78	Wood saprotroph	Cylindrobasidium torrendii	Basidiomycota	Agaricomycetes	Agaricales	Physalacriaceae	Cylindrobasidium	3	20	1	1	2	1	1	2	4	1	0	2	0	0	0	0	0
Rhobu1	79	Litter saprotroph	Rhodocollybia butyracea	Basidiomycota	Agaricomycetes	Agaricales	Omphalotaceae	Rhodocollybia	13	21	6	1	0	1	1	1	5	1	0	0	1	0	0	0	0
Lenlat1	80	Wood saprotroph	Lentinula lateritia	Basidiomycota	Agaricomycetes	Agaricales	Omphalotaceae	Lentinula	3	15	5	1	1	1	1	1	4	2	0	0	0	0	0	0	0
Gymlu1	81	Wood saprotroph	Gymnopus luxurians	Basidiomycota	Agaricomycetes	Agaricales	Omphalotaceae	Collybiopsis	19	27	7	1	4	1	1	2	5	1	0	0	0	0	0	0	0
Gyman1	82	Litter saprotroph	Gymnopus androsaceus	Basidiomycota	Agaricomycetes	Agaricales	Omphalotaceae	Gymnopus	17	53	2	5	1	1	1	2	3	1	0	0	1	0	0	0	0
Gymear1	83	Soil saprotroph	Gymnopus earleae	Basidiomycota	Agaricomycetes	Agaricales	Omphalotaceae	Gymnopus	16	25	4	2	2	1	1	3	3	1	0	0	0	0	0	0	0
Ompol1	84	Wood saprotroph	Omphalotus olearius	Basidiomycota	Agaricomycetes	Agaricales	Omphalotaceae	Omphalotus	1	12	0	1	0	1	1	1	3	1	0	0	0	0	0	0	0
Denbi1	85	Wood saprotroph	Dendrothele bispora	Basidiomycota	Agaricomycetes	Agaricales		Dendrothele	6	62	3	3	3	1	1	3	4	1	1	0	0	0	0	0	0
Marfi1	86	Litter saprotroph	Marasmius fiardii	Basidiomycota	Agaricomycetes	Agaricales	Marasmiaceae	Marasmius	14	31	7	1	2	1	1	3	9	0	0	0	0	0	0	0	0
MroMCA2997_1	87	Pathogen	Moniliophthora roreri	Basidiomycota	Agaricomycetes	Agaricales	Marasmiaceae	Moniliophthora	5	51	4	1	4	1	1	3	4	2	0	0	0	0	0	0	0
Cysmur1	88	Pathogen	Cystostereum murrayi	Basidiomycota	Agaricomycetes	Agaricales	Cystostereaceae	Cystostereum	4	23	2	3	1	1	1	1	4	1	0	0	0	0	0	0	0
Mycflo1	89	Litter saprotroph	Mycena floridula	Basidiomycota	Agaricomycetes	Agaricales	Mycenaceae	Mycena	10	54	4	1	3	1	1	5	6	1	0	0	0	0	0	0	0
Schco_LoeD_1	90	Wood saprotroph	Schizophyllum commune	Basidiomycota	Agaricomycetes	Agaricales	Schizophyllaceae	Schizophyllum	1	16	3	1	1	1	1	2	3	1	0	0	0	0	0	0	0
Schrad1	91	Wood saprotroph	Schizophyllum radiatum	Basidiomycota	Agaricomycetes	Agaricales	Schizophyllaceae	Schizophyllum	3	22	3	1	2	1	1	2	3	1	0	0	0	0	0	0	0
Schfas1	92	Litter saprotroph	Schizophyllum fasciatum	Basidiomycota	Agaricomycetes	Agaricales	Schizophyllaceae	Schizophyllum	2	15	3	1	1	1	1	2	1	2	0	0	0	0	0	0	0
Auramp1	93	Wood saprotroph	Auriculariopsis ampla	Basidiomycota	Agaricomycetes	Agaricales	Schizophyllaceae	Auriculariopsis	3	13	3	1	1	1	1	2	4	1	0	0	0	1	0	0	0
Fishe1	94	Wood saprotroph	Fistulina hepatica	Basidiomycota	Agaricomycetes	Agaricales	Fistulinaceae	Fistulina	9	8	3	1	1	1	1	1	7	1	0	0	0	0	0	0	0
Niavib1	95	Wood saprotroph	Nia vibrissa	Basidiomycota	Agaricomycetes	Agaricales	Cyphellopsidaceae	Nia	0	11	0	1	1	1	1	2	5	2	0	1	0	0	0	0	0
Denmi1	96	Wood saprotroph	Dendrothele microspora	Basidiomycota	Agaricomycetes	Agaricales		Dendrothele	7	36	4	2	3	1	1	3	7	2	0	1	0	0	0	0	0
Mychae1	97	Wood saprotroph	Mycena haematopus	Basidiomycota	Agaricomycetes	Agaricales	Mycenaceae	Mycena	9	38	6	1	2	1	1	3	12	1	0	0	1	0	0	0	0
Mycsan1	98	Litter saprotroph	Mycena sanguinolenta	Basidiomycota	Agaricomycetes	Agaricales	Mycenaceae	Mycena	20	61	11	5	4	1	1	5	10	1	0	2	0	1	0	0	0
Mycgal1	99	Litter saprotroph	Mycena galopus	Basidiomycota	Agaricomycetes	Agaricales	Mycenaceae	Mycena	27	84	13	3	2	1	1	5	17	1	0	1	0	1	0	0	0
Mycalb1	100	Grass saprotroph	Mycena albidolilacea	Basidiomycota	Agaricomycetes	Agaricales	Mycenaceae	Mycena	24	79	10	3	6	1	1	6	14	1	0	0	0	0	0	0	1
Mycoli1	101	Grass saprotroph	Mycena olivaceomarginata	Basidiomycota	Agaricomycetes	Agaricales	Mycenaceae	Mycena	40	147	18	3	4	1	1	10	28	2	0	0	0	0	0	0	2
Favcal1_2	102	Wood saprotroph	Favolaschia claudopus	Basidiomycota	Agaricomycetes	Agaricales	Mycenaceae	Favolaschia	9	54	6	1	0	1	0	7	10	1	0	0	0	0	0	0	0
Mycvit1	103	Litter saprotroph	Mycena vitilis	Basidiomycota	Agaricomycetes	Agaricales	Mycenaceae	Mycena	9	53	4	4	0	1	1	4	19	1	0	2	0	0	0	0	0
Mycpol1	104	Wood saprotroph	Mycena polygramma	Basidiomycota	Agaricomycetes	Agaricales	Mycenaceae	Mycena	13	89	6	4	0	1	1	5	23	2	0	1	1	0	0	0	0
Mycrub1	105	Litter saprotroph	Mycena capillaripes	Basidiomycota	Agaricomycetes	Agaricales	Mycenaceae	Mycena	14	89	6	2	1	1	1	6	14	1	0	1	1	0	0	0	0
Myclep1	106	Litter saprotroph	Mycena leptocephala	Basidiomycota	Agaricomycetes	Agaricales	Mycenaceae	Mycena	29	130	6	2	3	1	1	9	38	1	0	2	0	0	0	0	0
Mycmet1	107	Litter saprotroph	Mycena metata	Basidiomycota	Agaricomycetes	Agaricales	Mycenaceae	Mycena	34	55	1	6	3	1	1	5	17	1	0	1	0	0	0	0	0
Mycale1	108	Litter saprotroph	Mycena alexandri	Basidiomycota	Agaricomycetes	Agaricales	Mycenaceae	Mycena	24	46	1	3	4	1	1	4	11	1	0	1	0	0	0	0	0
Mycfil1	109	Litter saprotroph	Mycena filopes	Basidiomycota	Agaricomycetes	Agaricales	Mycenaceae	Mycena	7	64	0	2	1	1	1	3	14	1	0	1	1	0	0	0	0
Mycbel1	110	Grass saprotroph	Mycena belliae	Basidiomycota	Agaricomycetes	Agaricales	Mycenaceae	Mycena	4	17	1	2	0	1	1	3	7	1	0	0	0	0	0	0	0
Myclat1	111	Grass saprotroph	Mycena latifolia	Basidiomycota	Agaricomycetes	Agaricales	Mycenaceae	Mycena	19	93	4	3	1	1	1	5	15	1	0	0	0	0	0	0	0
Mycros1	112	Litter saprotroph	Mycena rosella	Basidiomycota	Agaricomycetes	Agaricales	Mycenaceae	Mycena	17	74	4	1	1	1	1	5	6	1	0	1	0	0	0	0	1
Mycvul1	113	Litter saprotroph	Mycena vulgaris	Basidiomycota	Agaricomycetes	Agaricales	Mycenaceae	Mycena	18	97	8	2	3	1	1	5	12	1	0	1	0	0	0	0	0
Mycepi1	114	Litter saprotroph	Mycena epipterygia	Basidiomycota	Agaricomycetes	Agaricales	Mycenaceae	Mycena	23	105	6	2	2	1	1	5	15	1	0	0	0	0	0	0	0
Myccro1	115	Litter saprotroph	Mycena crocata	Basidiomycota	Agaricomycetes	Agaricales	Mycenaceae	Mycena	8	58	4	2	1	1	1	6	7	3	0	3	1	0	0	0	0
Mycgale1	116	Wood saprotroph	Mycena galericulata	Basidiomycota	Agaricomycetes	Agaricales	Mycenaceae	Mycena	15	70	9	1	2	1	1	5	15	1	0	0	0	0	0	0	0
Mycmac1	117	Wood saprotroph	Mycena maculata	Basidiomycota	Agaricomycetes	Agaricales	Mycenaceae	Mycena	6	57	2	4	0	1	1	4	9	1	0	0	0	0	0	0	0
Mycreb1	118	Litter saprotroph	Mycena rebaudengoi	Basidiomycota	Agaricomycetes	Agaricales	Mycenaceae	Mycena	25	110	7	1	3	1	1	7	9	1	0	3	0	0	0	0	0
Myc59_1	119	Litter saprotroph	Mycena sp.	Basidiomycota	Agaricomycetes	Agaricales	Mycenaceae	Mycena	9	38	1	1	2	1	1	8	9	1	0	0	0	0	0	0	0
Mycami1	120	Wood saprotroph	Mycena amicta	Basidiomycota	Agaricomycetes	Agaricales	Mycenaceae	Mycena	6	48	3	2	5	1	1	6	12	1	0	1	2	0	0	0	0
Mycpur1	121	Grass saprotroph	Mycena pura	Basidiomycota	Agaricomycetes	Agaricales	Mycenaceae	Mycena	16	51	2	1	1	1	1	5	11	1	0	0	1	0	0	3	0
Rorror1	122	Litter saprotroph	Roridomyces roridus	Basidiomycota	Agaricomycetes	Agaricales	Mycenaceae	Roridomyces	16	51	3	4	1	1	1	3	6	1	0	1	0	0	0	0	0

## Sheet: SSP
Table S5 - The count of small secreted proteins (SSP)
JGI_ID	CladeOrder	Ecology	SpeciesName	Phylum	Class	Order	Family	Genus	X00025_00071_00503_01926_04670_08477_09439	X00085	X00106_13561	X00160	X00188	X00295	X00314	X00332	X00457	X00462	X00545	X00652	X00652_14200	X00657_13472	X00722	X00732	X00734	X00734_01083	X01083	X01145	X01161	X01183	X01185	X01328	X01476	X01522	X01670	X01764	X02221	X02469	X03067	X03211	X03227	X03330	X03443	X04777	X05572	X05730	X07249	X07504	X10342
Phocon1	1	Wood saprotroph	Pholiota conissans	Basidiomycota	Agaricomycetes	Agaricales	Strophariaceae	Pholiota	0	0	0	1	2	0	3	0	1	0	0	0	0	0	0	0	5	0	0	0	3	0	26	0	3	2	2	2	2	0	1	0	1	4	9	1	1	6	1	1	7
Phosp1	2	Wood saprotroph	Pholiota sp.	Basidiomycota	Agaricomycetes	Agaricales	Strophariaceae	Pholiota	0	0	0	0	2	0	0	0	1	0	0	0	0	1	0	0	5	0	0	0	3	0	33	1	3	2	2	3	2	0	1	0	1	5	11	0	1	4	1	1	9
Phohig1	3	Soil saprotroph	Pholiota molesta	Basidiomycota	Agaricomycetes	Agaricales	Strophariaceae	Pholiota	0	0	0	2	1	0	1	0	0	0	0	0	2	1	0	0	3	1	1	0	5	0	32	1	6	1	1	0	1	0	1	0	0	9	12	1	0	5	1	0	10
Hypsu1	4	Wood saprotroph	Hypholoma sublateritium	Basidiomycota	Agaricomycetes	Agaricales	Strophariaceae	Hypholoma	1	0	0	1	0	0	3	0	1	0	0	0	1	1	0	0	2	1	1	1	3	0	27	0	2	4	1	1	0	0	2	0	1	6	8	1	0	6	2	0	10
Phoaln1	5	Soil saprotroph	Pholiota alnicola	Basidiomycota	Agaricomycetes	Agaricales	Strophariaceae	Flammula	0	0	0	1	1	0	2	0	0	0	0	0	4	1	0	0	3	1	0	1	3	0	22	1	5	4	2	1	1	0	0	0	1	7	6	0	1	14	2	0	6
Hebvel2	6	Ectomycorrhiza	Hebeloma brunneifolium	Basidiomycota	Agaricomycetes	Agaricales	Hymenogastraceae	Hebeloma	1	0	0	0	6	0	2	1	0	0	0	0	4	0	0	0	0	0	1	1	3	0	20	0	1	10	1	4	2	0	0	0	1	8	1	1	3	3	1	0	6
Hebcy2	7	Ectomycorrhiza	Hebeloma cylindrosporum	Basidiomycota	Agaricomycetes	Agaricales	Hymenogastraceae	Hebeloma	1	0	0	0	2	0	2	1	0	0	0	0	0	0	0	1	0	0	1	1	3	1	13	0	0	4	0	2	1	0	0	0	1	4	0	1	2	3	1	0	7
Psicub1_1	8	Grass saprotroph	Psilocybe cubensis	Basidiomycota	Agaricomycetes	Agaricales	Strophariaceae	Psilocybe	0	0	1	0	2	0	3	1	1	0	0	0	0	1	1	0	4	0	2	1	4	0	18	0	1	4	1	2	1	0	4	0	1	3	11	1	3	1	4	0	7
Psiser1	9	Litter saprotroph	Psilocybe serbica	Basidiomycota	Agaricomycetes	Agaricales	Strophariaceae	Psilocybe	0	0	0	0	3	0	3	1	0	0	0	0	1	4	1	1	3	0	2	1	2	0	39	0	3	3	1	3	1	1	0	0	0	7	11	1	3	5	3	0	9
Agrped1	10	Grass saprotroph	Agrocybe pediades	Basidiomycota	Agaricomycetes	Agaricales	Strophariaceae	Agrocybe	0	0	0	1	1	0	4	2	1	0	0	0	0	1	1	0	6	0	3	0	2	6	43	0	3	5	2	3	0	0	0	0	1	10	11	1	1	4	1	0	11
Agrpra2	11	Litter saprotroph	Agrocybe praecox	Basidiomycota	Agaricomycetes	Agaricales	Strophariaceae	Agrocybe	0	0	0	1	2	0	3	1	0	0	0	0	0	0	1	0	6	0	3	0	3	2	31	0	2	2	2	2	1	0	0	0	0	14	13	1	0	3	3	0	11
Gymch1	12	Wood saprotroph	Gymnopilus chrysopellus	Basidiomycota	Agaricomycetes	Agaricales	Hymenogastraceae	Gymnopilus	0	0	0	1	1	0	2	2	0	0	0	0	2	0	0	0	4	1	1	0	3	2	33	0	1	2	2	0	1	0	0	0	1	5	6	1	0	2	1	0	7
Gymjun1	13	Wood saprotroph	Gymnopilus junonius	Basidiomycota	Agaricomycetes	Agaricales	Hymenogastraceae	Gymnopilus	0	0	2	1	1	0	1	0	1	0	0	2	3	0	1	0	4	1	1	0	3	0	12	0	3	2	2	1	0	0	0	0	1	2	7	0	0	3	3	0	6
Galma1	14	Wood saprotroph	Galerina marginata	Basidiomycota	Agaricomycetes	Agaricales	Strophariaceae	Galerina	0	0	0	0	1	0	2	2	3	0	0	0	4	0	0	0	10	0	4	0	1	1	42	0	1	5	3	0	1	0	2	0	1	7	12	1	0	5	1	0	7
Crafun1	15	Soil saprotroph	Crassisporium funariophilum	Basidiomycota	Agaricomycetes	Agaricales	Crassisporiaceae	Crassisporium	0	0	0	1	2	0	3	3	2	0	0	0	0	1	3	0	6	2	15	0	4	0	28	0	2	5	3	2	1	0	1	2	0	5	12	0	2	5	1	0	5
Corgl3	16	Ectomycorrhiza	Phlegmacium glaucopus	Basidiomycota	Agaricomycetes	Agaricales	Cortinariaceae	Phlegmacium	0	0	0	1	0	0	1	1	0	0	0	0	4	0	0	1	0	0	0	0	3	1	26	0	1	4	1	2	1	1	0	0	1	4	1	1	0	2	3	0	2
Crevar1	17	Wood saprotroph	Crepidotus variabilis	Basidiomycota	Agaricomycetes	Agaricales	Crepidotaceae	Crepidotus	0	1	0	1	2	0	4	2	3	0	0	0	2	2	0	0	2	0	3	0	4	1	37	1	3	4	1	4	1	0	1	1	1	3	14	1	3	1	3	0	11
Creces1	18	Wood saprotroph	Crepidotus cesatii	Basidiomycota	Agaricomycetes	Agaricales	Crepidotaceae	Crepidotus	0	0	0	0	4	1	3	3	3	0	0	0	2	1	0	1	5	0	1	0	3	1	54	1	3	5	1	2	1	0	2	1	1	3	17	2	5	4	2	0	8
Inolan1	19	Wood saprotroph	Inosperma lanatodiscum	Basidiomycota	Agaricomycetes	Agaricales	Inocybaceae	Inosperma	0	0	0	0	5	0	9	0	0	0	0	7	11	0	0	0	0	0	0	0	6	1	8	1	1	6	0	0	1	1	0	0	0	1	4	2	9	5	0	0	5
Phapla1	20	Wood saprotroph	Phaeosolenia platensis	Basidiomycota	Agaricomycetes	Agaricales	Chromocyphellaceae	Phaeosolenia	0	0	0	0	4	0	4	1	3	0	0	0	2	0	0	0	5	0	3	0	0	2	8	4	2	5	0	2	1	0	2	0	1	7	23	1	3	11	2	0	3
Panpap1	21	Grass saprotroph	Panaeolus papilionaceus	Basidiomycota	Agaricomycetes	Agaricales	Galeropsidaceae	Panaeolus	0	0	0	0	1	0	2	4	7	0	0	0	2	3	2	0	16	1	11	0	3	5	55	0	2	5	3	4	0	0	2	2	0	5	24	1	3	9	2	0	9
Conapa1	22	Grass saprotroph	Conocybe apala	Basidiomycota	Agaricomycetes	Agaricales	Bolbitiaceae	Conocybe	1	1	0	1	1	0	2	0	22	0	0	0	2	0	2	1	7	1	5	1	4	3	74	0	1	7	1	7	1	1	2	2	1	3	14	0	2	7	6	2	5
Bolvit1	23	Grass saprotroph	Bolbitius vitellinus	Basidiomycota	Agaricomycetes	Agaricales	Bolbitiaceae	Bolbitius	1	0	0	0	1	0	4	1	18	0	0	0	1	1	0	0	8	0	6	1	1	2	28	0	0	12	1	3	1	0	2	1	1	4	17	0	1	2	4	0	4
Copci1	24	Litter saprotroph	Coprinopsis cinerea	Basidiomycota	Agaricomycetes	Agaricales	Psathyrellaceae	Coprinopsis	1	0	0	0	1	0	3	0	5	0	0	0	7	2	1	0	8	0	4	0	3	0	31	0	2	8	1	0	0	0	0	2	1	3	16	0	7	3	4	0	6
Copscl1	25	Grass saprotroph	Coprinopsis sclerotiger	Basidiomycota	Agaricomycetes	Agaricales	Psathyrellaceae	Coprinopsis	1	0	0	0	1	0	3	1	1	0	0	0	3	0	2	0	4	0	5	0	5	0	16	1	1	6	0	6	1	1	0	0	0	4	9	1	4	9	2	0	6
Copmar1	26	Grass saprotroph	Coprinopsis marcescibilis	Basidiomycota	Agaricomycetes	Agaricales	Psathyrellaceae	Coprinopsis	1	0	0	1	1	0	4	1	1	0	0	0	2	2	1	0	5	0	1	0	3	0	30	1	2	6	1	1	1	0	0	2	0	6	23	1	4	9	5	0	4
Coppel1	27	Grass saprotroph	Coprinellus pellucidus	Basidiomycota	Agaricomycetes	Agaricales	Psathyrellaceae	Coprinellus	1	0	0	1	3	0	2	0	7	1	0	0	3	3	2	0	5	0	3	0	1	0	7	0	1	9	1	1	0	0	0	1	1	5	12	0	6	3	5	0	3
Copang1	28	Litter saprotroph	Coprinellus angulatus	Basidiomycota	Agaricomycetes	Agaricales	Psathyrellaceae	Tulosesus	1	0	0	0	3	0	8	0	5	0	0	0	12	1	3	1	15	0	2	1	4	0	14	0	2	13	1	2	0	0	0	1	0	6	39	1	0	8	6	0	6
Copmic2	29	Litter saprotroph	Coprinellus micaceus	Basidiomycota	Agaricomycetes	Agaricales	Psathyrellaceae	Coprinellus	0	0	0	1	3	0	4	0	5	0	0	0	2	9	1	1	8	0	2	0	3	2	21	0	1	8	0	2	1	0	0	1	0	2	26	0	4	7	5	0	6
Lacam2	30	Ectomycorrhiza	Laccaria amethystina	Basidiomycota	Agaricomycetes	Agaricales	Hydnangiaceae	Laccaria	0	0	0	1	9	0	1	0	0	0	1	0	0	0	1	0	0	0	0	1	1	0	6	0	1	5	2	1	1	0	0	0	1	6	0	0	2	6	1	0	8
Lacbi2	31	Ectomycorrhiza	Laccaria bicolor	Basidiomycota	Agaricomycetes	Agaricales	Hydnangiaceae	Laccaria	0	0	0	1	8	0	2	0	0	0	1	0	1	0	0	0	0	0	1	1	1	0	10	0	0	4	1	2	2	0	0	0	1	4	2	0	2	10	1	0	9
Cyapal1	32	Wood saprotroph	Cyathus pallidus	Basidiomycota	Agaricomycetes	Agaricales	Nidulariaceae	Cyathus	1	0	1	0	5	0	10	6	0	0	0	1	29	0	2	1	4	0	8	0	3	5	141	0	13	7	4	8	2	0	1	3	1	32	23	0	10	15	11	0	10
Cyaste1	33	Grass saprotroph	Cyathus stercoreus	Basidiomycota	Agaricomycetes	Agaricales	Nidulariaceae	Cyathus	1	0	0	0	7	0	6	5	0	0	0	0	48	0	1	0	4	0	3	0	4	5	132	0	18	8	2	6	3	1	1	4	0	38	19	0	5	14	8	0	9
Cyastr2	34	Wood saprotroph	Cyathus striatus	Basidiomycota	Agaricomycetes	Agaricales	Nidulariaceae	Cyathus	1	0	0	1	5	0	2	2	0	0	0	0	10	1	1	1	4	0	4	0	3	1	55	1	15	4	3	5	1	0	3	2	0	16	17	1	3	3	6	0	4
Mycden1	35	Wood saprotroph	Mycocalia denudata	Basidiomycota	Agaricomycetes	Agaricales	Nidulariaceae	Mycocalia	0	0	0	0	1	0	1	2	0	0	0	1	2	0	1	1	9	0	6	0	1	0	31	0	1	1	2	2	2	0	0	0	1	4	5	1	0	4	2	0	8
Nidsp1	36	Wood saprotroph	Nidula sp.	Basidiomycota	Agaricomycetes	Agaricales	Nidulariaceae	Nidula	0	0	0	0	2	0	2	1	0	0	0	1	14	0	0	1	3	0	2	0	2	0	53	2	2	1	4	6	1	0	0	2	0	3	23	1	2	2	4	0	7
Crula1	37	Wood saprotroph	Crucibulum laeve	Basidiomycota	Agaricomycetes	Agaricales	Nidulariaceae	Crucibulum	0	0	0	1	3	0	3	2	0	0	0	0	6	0	0	1	7	0	4	0	3	4	38	0	2	6	4	4	1	0	1	1	0	5	25	1	2	2	4	0	9
Agabi_varbisH97_2	38	Grass saprotroph	Agaricus bisporus H97	Basidiomycota	Agaricomycetes	Agaricales	Agaricaceae	Agaricus	1	2	1	1	1	1	4	1	1	1	1	2	4	2	2	1	1	1	5	1	3	4	18	0	3	3	2	1	1	1	1	1	1	2	6	0	2	4	0	1	4
Agabi_varbur_1	39	Grass saprotroph	Agaricus bisporus	Basidiomycota	Agaricomycetes	Agaricales	Agaricaceae	Agaricus	1	3	1	1	2	1	3	1	1	1	1	3	6	2	1	1	2	1	5	1	2	3	14	1	3	3	2	1	1	1	1	1	1	2	6	1	2	5	1	1	5
Agasi1	40	Grass saprotroph	Agaricus sinodeliciosus	Basidiomycota	Agaricomycetes	Agaricales	Agaricaceae	Agaricus	1	2	0	1	1	0	5	1	1	1	1	7	3	1	0	0	1	0	4	1	4	4	8	0	3	3	3	1	1	1	1	1	1	3	5	0	1	3	2	0	7
Macfu1	41	Litter saprotroph	Macrolepiota fuliginosa	Basidiomycota	Agaricomycetes	Agaricales	Agaricaceae	Macrolepiota	0	1	0	1	3	0	5	2	3	1	1	0	19	2	0	2	1	0	2	1	4	5	22	2	12	6	2	0	1	2	1	2	1	10	19	1	3	3	4	0	6
Lycper1	42	Litter saprotroph	Lycoperdon perlatum	Basidiomycota	Agaricomycetes	Agaricales	Lycoperdaceae	Lycoperdon	1	1	0	0	2	0	5	2	0	0	1	0	10	1	1	1	4	0	4	1	4	6	61	0	7	4	8	2	1	0	0	2	0	6	13	1	4	3	3	0	6
Amaapr1	43	Ectomycorrhiza	Amanita muscaria	Basidiomycota	Agaricomycetes	Agaricales	Amanitaceae	Amanita	1	1	0	0	0	0	3	0	0	0	0	0	2	0	0	0	0	0	0	0	1	3	11	0	1	3	0	2	1	1	0	0	1	3	0	1	0	8	2	0	5
Amamu1	44	Ectomycorrhiza	Amanita muscaria Koide	Basidiomycota	Agaricomycetes	Agaricales	Amanitaceae	Amanita	1	0	0	1	1	0	2	1	0	0	0	0	3	0	0	0	0	0	0	0	1	3	11	0	1	2	0	4	1	0	0	0	1	4	0	1	0	7	2	0	6
Amarub1	45	Ectomycorrhiza	Amanita rubescens	Basidiomycota	Agaricomycetes	Agaricales	Amanitaceae	Amanita	0	0	0	0	0	0	0	0	0	0	0	0	2	0	0	0	0	0	0	1	1	1	3	0	3	0	1	0	1	1	0	0	1	1	0	2	0	1	8	0	5
Amath1	46	Ectomycorrhiza	Amanita thiersii	Basidiomycota	Agaricomycetes	Agaricales	Amanitaceae	Amanita	1	0	0	2	3	0	0	1	0	0	0	0	0	0	1	0	0	0	2	0	2	4	23	0	1	3	3	4	1	0	1	0	1	3	8	1	5	2	3	0	4
Trima3	47	Ectomycorrhiza	Tricholoma matsutake	Basidiomycota	Agaricomycetes	Agaricales	Tricholomataceae	Tricholoma	0	0	0	0	0	0	1	0	0	1	0	0	0	0	1	0	0	0	0	0	0	0	6	1	1	1	1	0	1	0	0	0	0	5	1	1	0	5	1	0	2
Tripop1	48	Ectomycorrhiza	Tricholoma populinum	Basidiomycota	Agaricomycetes	Agaricales	Tricholomataceae	Tricholoma	0	2	0	0	2	0	1	1	0	0	0	0	3	0	2	0	0	0	0	0	1	0	9	0	2	4	1	3	1	1	0	0	1	4	0	0	2	4	3	0	6
Lepnud1	49	Litter saprotroph	Lepista nuda	Basidiomycota	Agaricomycetes	Agaricales	Clitocybaceae	Collybia	0	0	0	1	1	0	3	0	2	0	1	0	2	2	1	1	12	0	6	1	1	2	36	0	2	3	5	10	1	0	0	3	0	8	22	1	2	6	3	0	8
Lyoat1	50	Soil saprotroph	Lyophyllum atratum	Basidiomycota	Agaricomycetes	Agaricales	Lyophyllaceae	Lyophyllum	0	0	0	0	1	0	7	4	1	0	1	0	2	2	1	1	3	0	6	1	4	2	38	0	3	5	5	6	0	0	1	0	0	5	24	1	5	7	2	0	7
TerJ132_1	51	Grass saprotroph	Termitomyces sp.	Basidiomycota	Agaricomycetes	Agaricales	Lyophyllaceae	Termitomyces	0	0	0	1	1	0	1	1	0	0	0	0	2	0	2	0	1	0	3	0	3	1	5	0	1	2	2	0	0	0	0	0	1	3	2	0	0	2	4	0	2
Hypma1	52	Wood saprotroph	Hypsizygus marmoreus	Basidiomycota	Agaricomycetes	Agaricales	Lyophyllaceae	Hypsizygus	0	0	0	0	1	0	2	2	0	0	1	0	0	0	1	0	5	0	0	1	3	1	10	0	2	3	2	3	1	0	0	1	0	7	15	1	3	4	3	0	4
Cligib1	53	Litter saprotroph	Clitocybe gibba	Basidiomycota	Agaricomycetes	Agaricales		Infundibulicybe	0	0	0	0	4	2	6	1	0	0	0	0	1	2	4	3	4	0	3	1	1	1	65	0	8	4	4	4	1	0	1	2	0	10	10	1	2	9	7	0	6
Plucer1	54	Wood saprotroph	Pluteus cervinus	Basidiomycota	Agaricomycetes	Agaricales	Pluteaceae	Pluteus	1	0	0	1	4	0	7	1	0	1	1	0	5	0	0	0	1	0	0	0	2	1	44	0	1	4	0	3	1	0	1	1	1	3	16	0	2	8	3	0	5
Volvo1	55	Grass saprotroph	Volvariella volvacea	Basidiomycota	Agaricomycetes	Agaricales	Pluteaceae	Volvariella	0	0	1	0	2	0	1	0	0	0	0	0	0	1	0	0	1	0	1	0	1	2	6	0	1	3	2	2	1	0	2	2	0	1	14	0	8	8	1	0	4
Radcon1	56	Wood saprotroph	Radulomyces confluens	Basidiomycota	Agaricomycetes	Agaricales	Radulomycetaceae	Radulomyces	0	0	0	1	6	1	9	0	0	1	0	0	0	0	1	0	2	0	0	0	2	0	18	2	2	1	1	0	1	1	0	0	1	6	2	1	0	2	6	0	10
Aphpse1	57	Wood saprotroph	Aphanobasidium pseudotsugae	Basidiomycota	Agaricomycetes	Agaricales	Radulomycetaceae	Aphanobasidium	0	0	0	1	2	0	9	0	0	0	0	0	0	0	1	0	3	0	0	0	2	0	15	1	1	1	1	1	1	1	0	0	1	4	2	1	0	3	3	0	5
Ptegra1	58	Grass saprotroph	Pterula gracilis	Basidiomycota	Agaricomycetes	Agaricales	Pterulaceae	Pterula	0	0	0	1	5	1	9	0	1	0	1	1	7	3	3	1	1	0	2	1	1	0	19	0	7	8	3	0	1	0	0	2	1	3	19	0	0	3	3	0	7
Hygcoc2	59	Grass saprotroph	Hygrocybe coccinea	Basidiomycota	Agaricomycetes	Agaricales	Hygrophoraceae	Hygrocybe	0	0	0	1	1	0	0	0	0	0	0	0	0	0	0	2	0	0	0	0	1	0	0	0	0	2	0	0	0	1	0	0	1	0	0	1	0	4	1	0	4
Crison1	60	Pathogen	Cristinia sonorae	Basidiomycota	Agaricomycetes	Agaricales	Stephanosporaceae	Cristinia	0	0	0	1	0	0	2	0	0	0	0	0	0	0	0	0	2	0	0	1	2	2	6	1	2	0	2	1	1	0	0	0	1	7	8	1	2	2	3	0	6
PleosPC9_1	61	Wood saprotroph	Pleurotus ostreatus	Basidiomycota	Agaricomycetes	Agaricales	Pleurotaceae	Pleurotus	1	0	0	1	2	0	3	0	1	0	0	0	6	0	1	0	4	0	0	1	3	2	19	1	3	4	2	5	1	0	1	1	0	2	14	0	2	4	7	0	8
Pleery1	62	Wood saprotroph	Pleurotus eryngii	Basidiomycota	Agaricomycetes	Agaricales	Pleurotaceae	Pleurotus	1	0	0	1	1	0	4	0	0	0	0	0	4	1	2	3	3	0	0	1	3	1	11	1	2	3	2	3	1	0	1	1	0	3	18	1	4	5	6	0	10
Armga1	63	Wood saprotroph	Armillaria gallica	Basidiomycota	Agaricomycetes	Agaricales	Physalacriaceae	Armillaria	0	0	0	1	4	0	5	0	0	0	2	0	0	2	1	2	1	0	0	0	2	1	46	2	12	7	4	3	1	0	1	4	0	13	11	0	0	3	5	0	16
Armcep1	64	Wood saprotroph	Armillaria cepistipes	Basidiomycota	Agaricomycetes	Agaricales	Physalacriaceae	Armillaria	0	0	1	0	4	0	1	0	0	0	3	0	0	1	2	0	1	0	0	0	3	0	44	2	10	6	4	2	1	0	0	3	1	14	10	0	0	2	5	0	14
Armnab1	65	Wood saprotroph	Armillaria nabsnona	Basidiomycota	Agaricomycetes	Agaricales	Physalacriaceae	Armillaria	0	0	0	0	5	0	5	0	0	0	1	0	0	3	2	1	2	0	0	0	2	1	44	1	9	6	4	2	1	0	1	6	1	14	13	0	0	3	5	0	16
Armost1	66	Pathogen	Armillaria ostoyae	Basidiomycota	Agaricomycetes	Agaricales	Physalacriaceae	Armillaria	0	0	0	1	5	0	3	0	0	0	2	0	0	3	1	0	1	0	0	0	3	1	32	2	15	9	4	2	1	0	1	6	0	5	12	1	0	2	5	0	15
Armosto1	67	Wood saprotroph	Armillaria solidipes	Basidiomycota	Agaricomycetes	Agaricales	Physalacriaceae	Armillaria	0	0	0	0	6	0	1	0	0	0	2	0	0	0	2	0	1	0	0	0	3	0	39	1	12	4	4	2	1	0	0	7	1	8	9	0	0	2	5	0	15
Armbor1	68	Wood saprotroph	Armillaria borealis	Basidiomycota	Agaricomycetes	Agaricales	Physalacriaceae	Armillaria	0	0	0	0	3	0	4	0	0	0	3	0	0	4	2	0	2	0	0	0	4	1	41	1	14	7	4	2	1	0	1	7	1	8	14	0	0	3	4	0	18
Armfum1	69	Wood saprotroph	Armillaria fumosa	Basidiomycota	Agaricomycetes	Agaricales	Physalacriaceae	Armillaria	0	0	0	0	4	0	5	0	0	0	1	0	0	3	2	0	1	0	0	0	3	1	34	1	12	6	4	2	1	0	2	5	1	8	11	0	0	2	5	0	18
Armlut1	70	Litter saprotroph	Armillaria luteobubalina	Basidiomycota	Agaricomycetes	Agaricales	Physalacriaceae	Armillaria	0	0	0	1	5	1	4	0	1	0	3	0	0	4	4	2	0	0	0	0	4	0	31	3	21	6	4	7	1	0	1	6	1	12	16	0	0	4	4	0	18
Armnov1	71	Pathogen	Armillaria novae-zelandiae	Basidiomycota	Agaricomycetes	Agaricales	Physalacriaceae	Armillaria	0	0	1	0	4	0	5	0	0	0	1	0	0	4	2	0	2	0	0	0	2	1	35	3	16	6	4	3	1	0	1	5	1	11	14	0	0	4	5	0	12
Armme1_1	72	Pathogen	Armillaria mellea	Basidiomycota	Agaricomycetes	Agaricales	Physalacriaceae	Armillaria	0	0	0	1	4	0	4	0	0	0	1	0	0	0	1	1	2	0	0	1	3	0	31	1	9	7	2	7	1	0	0	4	0	7	5	0	0	2	5	0	12
Armect1	73	Litter saprotroph	Armillaria ectypa	Basidiomycota	Agaricomycetes	Agaricales	Physalacriaceae	Desarmillaria	0	0	0	0	3	0	4	0	0	0	1	0	0	5	2	1	0	0	0	0	2	1	23	0	1	2	4	4	1	0	1	5	1	1	9	1	0	3	8	0	14
Armtab1	74	Wood saprotroph	Armillaria tabescens	Basidiomycota	Agaricomycetes	Agaricales	Physalacriaceae	Desarmillaria	0	0	0	1	4	0	4	0	0	0	1	0	1	3	2	1	1	0	0	0	3	1	36	2	13	5	4	3	1	1	1	6	1	12	14	1	1	3	4	0	13
Guyne1	75	Wood saprotroph	Guyanagaster necrorhizus	Basidiomycota	Agaricomycetes	Agaricales	Physalacriaceae	Guyanagaster	0	0	0	0	5	0	4	0	0	0	0	0	0	2	1	0	2	0	0	0	4	0	22	0	3	2	4	5	1	0	1	0	1	3	8	0	0	3	5	0	11
Hymrad1	76	Wood saprotroph	Hymenopellis radicata	Basidiomycota	Agaricomycetes	Agaricales	Physalacriaceae	Hymenopellis	0	0	0	1	6	0	9	0	0	1	1	0	0	5	3	1	1	1	0	1	5	0	11	3	3	4	3	4	1	0	2	7	2	7	14	0	1	5	5	0	10
Oudmuc1	77	Wood saprotroph	Oudemansiella mucida	Basidiomycota	Agaricomycetes	Agaricales	Physalacriaceae	Mucidula	0	0	0	0	6	0	5	0	0	0	1	0	0	4	2	1	1	0	0	0	1	0	10	5	2	5	3	3	4	0	1	7	1	7	12	1	5	3	3	0	11
Cylto1	78	Wood saprotroph	Cylindrobasidium torrendii	Basidiomycota	Agaricomycetes	Agaricales	Physalacriaceae	Cylindrobasidium	0	0	1	1	3	0	10	0	1	1	2	0	1	5	3	0	0	0	4	0	1	0	5	3	2	4	3	0	1	0	2	3	1	5	15	1	2	3	3	0	15
Rhobu1	79	Litter saprotroph	Rhodocollybia butyracea	Basidiomycota	Agaricomycetes	Agaricales	Omphalotaceae	Rhodocollybia	1	0	0	1	2	1	6	0	3	1	0	0	0	1	2	1	0	2	1	0	4	0	66	11	6	0	3	1	1	1	0	0	1	8	0	1	0	3	5	0	9
Lenlat1	80	Wood saprotroph	Lentinula lateritia	Basidiomycota	Agaricomycetes	Agaricales	Omphalotaceae	Lentinula	1	0	0	1	0	0	5	0	0	0	0	0	0	3	2	1	2	0	0	0	2	1	15	2	3	0	3	0	1	1	0	0	1	6	4	1	0	3	3	0	8
Gymlu1	81	Wood saprotroph	Gymnopus luxurians	Basidiomycota	Agaricomycetes	Agaricales	Omphalotaceae	Collybiopsis	0	1	0	1	2	0	8	0	3	0	0	0	0	0	1	2	3	0	2	0	3	4	35	10	12	0	3	0	0	1	0	1	1	9	2	1	0	6	7	0	15
Gyman1	82	Litter saprotroph	Gymnopus androsaceus	Basidiomycota	Agaricomycetes	Agaricales	Omphalotaceae	Gymnopus	1	0	0	1	1	0	5	0	2	0	0	0	0	0	1	0	0	2	2	0	4	0	23	3	7	0	4	0	0	0	0	0	1	6	0	1	0	6	2	0	13
Gymear1	83	Soil saprotroph	Gymnopus earleae	Basidiomycota	Agaricomycetes	Agaricales	Omphalotaceae	Gymnopus	0	0	0	1	1	0	5	0	4	0	0	0	0	1	1	0	5	1	4	1	2	0	67	1	7	0	4	0	2	0	0	0	1	7	0	1	0	3	4	0	12
Ompol1	84	Wood saprotroph	Omphalotus olearius	Basidiomycota	Agaricomycetes	Agaricales	Omphalotaceae	Omphalotus	0	0	0	0	2	0	3	0	0	0	0	0	0	1	1	0	0	0	0	0	2	0	11	1	1	1	1	1	1	1	1	0	0	5	2	0	0	2	4	0	5
Denbi1	85	Wood saprotroph	Dendrothele bispora	Basidiomycota	Agaricomycetes	Agaricales		Dendrothele	1	0	0	0	4	0	5	0	2	0	2	0	0	1	0	2	2	0	6	0	7	2	29	12	6	3	3	0	1	2	1	3	1	11	7	1	0	8	4	0	13
Marfi1	86	Litter saprotroph	Marasmius fiardii	Basidiomycota	Agaricomycetes	Agaricales	Marasmiaceae	Marasmius	0	0	0	0	2	0	4	0	1	0	1	0	6	0	4	1	1	1	4	1	3	2	36	7	4	10	5	3	1	0	3	1	1	13	13	1	0	3	3	0	12
MroMCA2997_1	87	Pathogen	Moniliophthora roreri	Basidiomycota	Agaricomycetes	Agaricales	Marasmiaceae	Moniliophthora	1	0	0	2	9	0	7	0	2	0	1	0	0	1	3	1	2	0	2	0	3	1	40	7	1	11	3	0	1	0	1	3	1	5	18	1	1	9	9	0	8
Cysmur1	88	Pathogen	Cystostereum murrayi	Basidiomycota	Agaricomycetes	Agaricales	Cystostereaceae	Cystostereum	1	0	0	0	3	0	4	0	2	0	0	0	1	1	2	0	0	0	0	0	3	1	0	4	2	1	2	0	2	0	0	3	1	9	13	0	1	3	3	0	11
Mycflo1	89	Litter saprotroph	Mycena floridula	Basidiomycota	Agaricomycetes	Agaricales	Mycenaceae	Mycena	0	0	0	0	3	0	4	2	0	1	0	0	1	1	6	0	2	1	4	0	3	1	53	45	5	6	2	1	2	0	2	0	0	7	12	1	2	3	2	0	13
Schco_LoeD_1	90	Wood saprotroph	Schizophyllum commune	Basidiomycota	Agaricomycetes	Agaricales	Schizophyllaceae	Schizophyllum	0	0	0	0	4	0	7	0	1	0	2	0	2	2	3	0	1	0	1	0	2	1	9	0	1	3	1	3	1	0	2	3	1	9	11	1	0	6	4	0	15
Schrad1	91	Wood saprotroph	Schizophyllum radiatum	Basidiomycota	Agaricomycetes	Agaricales	Schizophyllaceae	Schizophyllum	0	0	0	0	4	0	8	0	1	0	4	0	2	1	2	0	1	0	3	0	6	2	14	0	1	3	1	3	1	0	2	3	1	9	12	1	0	11	5	0	15
Schfas1	92	Litter saprotroph	Schizophyllum fasciatum	Basidiomycota	Agaricomycetes	Agaricales	Schizophyllaceae	Schizophyllum	0	0	0	1	2	0	4	0	0	0	1	1	1	1	2	1	1	0	1	0	3	1	8	0	1	3	1	2	0	0	1	3	1	10	13	0	0	5	4	0	13
Auramp1	93	Wood saprotroph	Auriculariopsis ampla	Basidiomycota	Agaricomycetes	Agaricales	Schizophyllaceae	Auriculariopsis	0	0	0	0	3	0	8	0	0	0	2	0	2	1	2	0	0	0	2	0	4	1	8	0	1	4	1	3	0	0	1	4	0	6	12	1	0	8	4	0	7
Fishe1	94	Wood saprotroph	Fistulina hepatica	Basidiomycota	Agaricomycetes	Agaricales	Fistulinaceae	Fistulina	0	1	0	1	1	0	5	0	0	0	0	0	0	0	0	0	0	0	0	0	0	0	8	1	0	1	1	0	1	0	0	0	0	2	3	1	0	3	6	0	6
Niavib1	95	Wood saprotroph	Nia vibrissa	Basidiomycota	Agaricomycetes	Agaricales	Cyphellopsidaceae	Nia	0	0	0	1	1	0	2	0	2	0	0	0	1	0	0	1	0	0	4	0	1	0	0	2	0	3	1	2	1	1	0	0	0	1	10	1	2	3	1	0	2
Denmi1	96	Wood saprotroph	Dendrothele microspora	Basidiomycota	Agaricomycetes	Agaricales		Dendrothele	0	0	0	0	2	0	7	0	1	0	1	1	8	1	2	0	1	0	6	0	7	1	11	1	3	5	3	2	1	0	2	4	1	9	17	0	0	6	2	0	13
Mychae1	97	Wood saprotroph	Mycena haematopus	Basidiomycota	Agaricomycetes	Agaricales	Mycenaceae	Mycena	0	0	0	0	1	0	10	0	4	0	0	1	4	1	2	2	1	1	2	1	3	1	22	9	1	3	5	5	1	1	2	0	0	0	2	1	0	3	1	0	4
Mycsan1	98	Litter saprotroph	Mycena sanguinolenta	Basidiomycota	Agaricomycetes	Agaricales	Mycenaceae	Mycena	0	0	0	0	5	0	17	0	3	0	0	2	15	2	6	0	3	2	7	1	4	1	32	9	3	4	2	2	2	1	5	0	1	15	5	1	0	4	1	0	9
Mycgal1	99	Litter saprotroph	Mycena galopus	Basidiomycota	Agaricomycetes	Agaricales	Mycenaceae	Mycena	0	0	2	1	2	0	19	0	5	0	0	0	12	2	6	4	4	4	5	1	2	1	54	12	3	7	3	4	3	0	2	0	0	3	3	0	0	6	2	0	9
Mycalb1	100	Grass saprotroph	Mycena albidolilacea	Basidiomycota	Agaricomycetes	Agaricales	Mycenaceae	Mycena	0	0	0	0	4	0	11	0	2	0	0	2	12	4	7	2	5	2	5	0	5	2	63	12	4	5	6	4	1	0	1	2	1	4	5	1	1	9	2	0	10
Mycoli1	101	Grass saprotroph	Mycena olivaceomarginata	Basidiomycota	Agaricomycetes	Agaricales	Mycenaceae	Mycena	0	0	1	0	11	1	19	0	4	0	0	0	17	5	5	7	3	5	11	0	3	5	69	18	2	9	12	8	3	0	3	2	1	15	15	1	2	6	5	0	16
Favcal1_2	102	Wood saprotroph	Favolaschia claudopus	Basidiomycota	Agaricomycetes	Agaricales	Mycenaceae	Favolaschia	0	0	0	0	1	0	22	0	3	0	1	0	2	0	1	6	0	1	1	0	8	2	25	3	0	2	9	3	1	0	0	0	1	5	7	1	1	12	7	0	7
Mycvit1	103	Litter saprotroph	Mycena vitilis	Basidiomycota	Agaricomycetes	Agaricales	Mycenaceae	Mycena	0	0	0	0	2	0	15	0	0	0	0	0	5	3	5	2	3	1	3	0	6	1	26	15	2	7	5	6	1	1	1	0	1	4	9	1	2	3	1	0	11
Mycpol1	104	Wood saprotroph	Mycena polygramma	Basidiomycota	Agaricomycetes	Agaricales	Mycenaceae	Mycena	0	0	0	0	2	0	13	0	1	0	0	0	4	1	5	1	4	2	5	0	5	2	47	20	2	8	7	7	3	0	1	0	1	7	10	1	0	5	0	0	15
Mycrub1	105	Litter saprotroph	Mycena capillaripes	Basidiomycota	Agaricomycetes	Agaricales	Mycenaceae	Mycena	0	0	1	1	4	0	13	0	2	0	0	4	10	1	4	0	5	1	6	1	4	1	5	20	1	8	4	7	4	1	3	2	1	5	5	1	1	11	1	0	5
Myclep1	106	Litter saprotroph	Mycena leptocephala	Basidiomycota	Agaricomycetes	Agaricales	Mycenaceae	Mycena	0	0	0	2	6	0	18	0	8	0	0	5	28	2	3	7	13	2	9	1	4	1	85	16	2	14	3	4	2	0	6	3	0	17	13	1	0	10	1	0	10
Mycmet1	107	Litter saprotroph	Mycena metata	Basidiomycota	Agaricomycetes	Agaricales	Mycenaceae	Mycena	0	0	1	0	2	0	15	1	3	0	0	5	10	2	3	2	3	2	6	0	3	1	49	14	2	7	6	3	1	1	0	0	0	3	3	1	0	4	2	0	14
Mycale1	108	Litter saprotroph	Mycena alexandri	Basidiomycota	Agaricomycetes	Agaricales	Mycenaceae	Mycena	0	1	0	0	2	0	11	1	4	0	0	2	12	3	1	2	1	1	5	0	2	1	40	7	3	5	4	4	1	1	0	0	1	4	4	2	1	5	3	0	12
Mycfil1	109	Litter saprotroph	Mycena filopes	Basidiomycota	Agaricomycetes	Agaricales	Mycenaceae	Mycena	0	0	0	0	1	0	7	2	2	0	0	1	1	3	2	0	1	1	5	1	4	1	34	11	2	6	4	4	1	0	2	3	1	3	6	1	1	5	7	0	13
Mycbel1	110	Grass saprotroph	Mycena belliae	Basidiomycota	Agaricomycetes	Agaricales	Mycenaceae	Mycena	0	1	0	1	1	0	3	1	1	0	0	0	2	1	0	4	1	1	4	0	2	0	17	5	0	2	3	2	3	0	0	0	0	6	2	2	2	4	2	0	7
Myclat1	111	Grass saprotroph	Mycena latifolia	Basidiomycota	Agaricomycetes	Agaricales	Mycenaceae	Mycena	0	0	0	0	6	1	10	2	2	0	0	0	10	2	1	0	3	2	6	0	6	1	60	6	2	4	5	5	3	1	1	0	0	5	8	1	3	3	1	1	5
Mycros1	112	Litter saprotroph	Mycena rosella	Basidiomycota	Agaricomycetes	Agaricales	Mycenaceae	Mycena	0	1	0	0	1	0	6	0	3	0	0	1	5	3	4	1	2	1	5	0	5	1	55	6	2	2	3	2	2	1	0	0	1	4	6	1	8	5	4	0	10
Mycvul1	113	Litter saprotroph	Mycena vulgaris	Basidiomycota	Agaricomycetes	Agaricales	Mycenaceae	Mycena	0	0	0	1	5	0	10	3	2	0	0	3	19	2	1	3	5	2	10	1	4	2	40	16	5	6	4	5	3	0	1	2	1	9	9	1	6	9	1	0	14
Mycepi1	114	Litter saprotroph	Mycena epipterygia	Basidiomycota	Agaricomycetes	Agaricales	Mycenaceae	Mycena	0	0	0	1	1	0	9	2	5	0	0	1	6	0	2	0	4	1	5	0	2	2	90	11	5	6	4	4	3	1	2	0	1	4	6	1	0	2	1	0	11
Myccro1	115	Litter saprotroph	Mycena crocata	Basidiomycota	Agaricomycetes	Agaricales	Mycenaceae	Mycena	0	0	0	1	1	0	9	1	1	1	0	0	12	3	2	0	1	1	2	0	4	1	24	13	0	6	4	3	1	1	1	3	1	7	4	1	4	12	1	0	6
Mycgale1	116	Wood saprotroph	Mycena galericulata	Basidiomycota	Agaricomycetes	Agaricales	Mycenaceae	Mycena	0	0	0	0	1	0	14	0	3	0	0	2	13	1	2	1	3	1	5	1	4	2	102	10	3	3	16	5	2	1	0	0	2	2	4	1	1	6	2	0	14
Mycmac1	117	Wood saprotroph	Mycena maculata	Basidiomycota	Agaricomycetes	Agaricales	Mycenaceae	Mycena	0	0	0	0	1	0	6	0	2	0	0	0	7	0	2	1	3	0	4	0	4	1	14	5	0	2	5	3	1	1	0	0	1	3	2	1	0	3	1	0	7
Mycreb1	118	Litter saprotroph	Mycena rebaudengoi	Basidiomycota	Agaricomycetes	Agaricales	Mycenaceae	Mycena	0	0	1	0	3	0	11	1	2	0	0	22	21	5	1	3	5	1	7	1	1	1	108	29	2	9	3	2	3	1	4	3	0	3	8	1	4	16	1	0	15
Myc59_1	119	Litter saprotroph	Mycena sp.	Basidiomycota	Agaricomycetes	Agaricales	Mycenaceae	Mycena	1	0	0	1	3	1	8	0	2	0	0	5	7	0	1	2	8	0	5	1	2	1	12	5	1	3	3	2	0	1	6	1	0	2	4	1	0	8	1	0	5
Mycami1	120	Wood saprotroph	Mycena amicta	Basidiomycota	Agaricomycetes	Agaricales	Mycenaceae	Mycena	0	0	1	1	5	0	7	0	2	0	0	0	3	2	1	1	2	0	4	1	5	1	33	9	1	5	5	3	3	1	0	0	0	3	1	1	0	7	1	0	8
Mycpur1	121	Grass saprotroph	Mycena pura	Basidiomycota	Agaricomycetes	Agaricales	Mycenaceae	Mycena	0	0	0	1	2	0	7	0	2	0	0	3	10	2	0	3	1	1	6	1	2	1	23	1	2	2	4	4	3	0	0	1	1	4	2	1	0	3	1	0	7
Rorror1	122	Litter saprotroph	Roridomyces roridus	Basidiomycota	Agaricomycetes	Agaricales	Mycenaceae	Roridomyces	0	0	0	0	1	0	12	0	3	0	0	2	1	1	5	1	3	1	5	0	3	1	16	6	0	0	5	4	2	1	2	0	0	2	6	0	0	4	3	0	14
[truncated: 1,079 more columns]
